# Supplementary material for: Silver(i)-catalyzed sequential hydroamination and Prins type cyclization for the synthesis of fused benzo-δ-sultams
Source: Royal Society of Chemistry journal article supplement (doi:10.1039/c8ob00918j), 2018-01-01
Supplement: c8ob00918j1.pdf [file c8ob00918j1.pdf]

Supporting Information

## Silver(I)-catalyzed sequential hydroamination and Prins type cyclization for the synthesis of fused benzo- $\delta$ -sultams

B. Maheshwar Rao<sup>a</sup>, J. S. Yadav<sup>a</sup>, B. Sridhar<sup>b</sup>, B. V. Subba Reddy<sup>a\*</sup>

<sup>a</sup>Centre for Semiochemicals, <sup>b</sup>Laboratory of X-ray Crystallography,  
CSIR-Indian Institute of Chemical Technology, Hyderabad 500007, India.

Email: basireddy@iict.res.in, Fax: 91-40-27160512

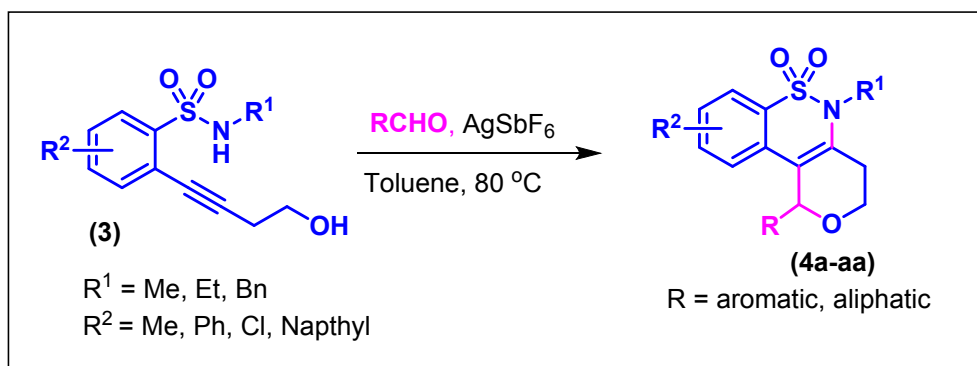

| S. No | Contents                                                 | Page    |
|-------|----------------------------------------------------------|---------|
| 1.    | Experimental procedure                                   | S2-S3   |
| 2.    | Spectral data of products (4a-aa)                        | S3-S18  |
| 3.    | <sup>1</sup> H & <sup>13</sup> C NMR spectra of products | S19-S45 |
| 4.    | X-ray crystal structure of 4d                            | S46     |

## 1. Experimental procedures

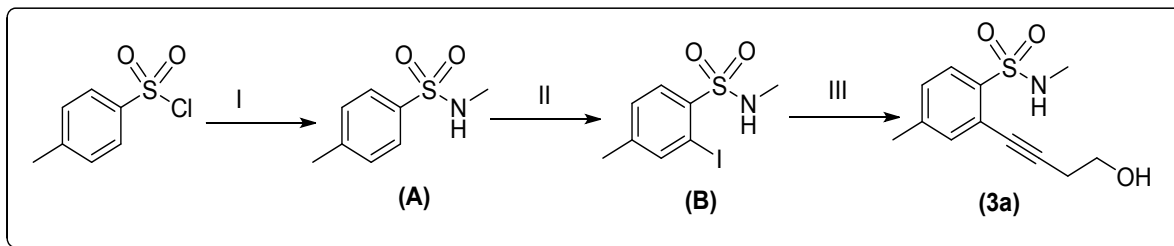

**Reagents and conditions:** (i) 40% Monomethylamine solution,  $\text{CHCl}_3$ , reflux (ii) *n*-BuLi, THF,  $\text{I}_2$  (iii)  $[\text{PdCl}_2(\text{PPh}_3)_2]$ , CuI,  $\text{CH}_3\text{CN}$ ,  $\text{Et}_3\text{N}$

### Synthesis of *N*,4-dimethylbenzenesulfonamide (A)

To a stirred solution of tosyl chloride (10g, 1 equiv, 0.052mmol) in chloroform (100 mL) at 0 °C was added 40% aqueous solution of monomethyl amine (4g, ~15ml, 0.12 mmol) drop wise. The resulting mixture was heated under reflux for about 4h. After completion, the solvent was removed under reduced pressure and the residue was dissolved in chloroform and washed with dil.HCl (1x50mL) followed by a brine solution. The organic layer was dried over  $\text{Na}_2\text{SO}_4$  and concentrated under vacuum to obtain the desired compound **1a** (9.25g, 95% yield).

### Synthesis of 2-iodo-*N*,4-dimethylbenzenesulfonamide (B)

To a solution of *N*,4-dimethylbenzenesulfonamide (5g, 0.027 mmol) in THF (50 mL) was cooled to 0 °C under nitrogen atmosphere and treated with a solution of *n*-BuLi in hexane (14 mL, 0.059 mmol) dropwise. The mixture was stirred at 0 °C for 15 min and then warmed to room temperature. After stirring for 1h at room temperature, the resulting bright yellow solution was cooled to -78 °C and stirred for 15 min. Then a solution of iodine (7.55g, 0.03 mmol) in THF (40mL) was added and the resulting mixture was stirred at -78 °C for 1h and then quenched with a sat. solution of  $\text{NH}_4\text{Cl}$  (40 mL) and washed with a sat. solution of  $\text{Na}_2\text{S}_2\text{O}_3$  (100 mL) and then extracted with ethyl acetate. The organic layers were combined, dried over anhydrous  $\text{Na}_2\text{SO}_4$  and concentrated under reduced pressure. The resulting residue was purified using EtOAc/hexane to obtain the desired compound **2a** (7.1g, 85% yield).

**Synthesis of 2-(4-hydroxybut-1-yn-1-yl)-*N*,4-dimethylbenzenesulfonamide by Sonogashira reaction (3a):**

To a N<sub>2</sub>-degassed solution of 2-iodo-*N*,4-dimethylbenzenesulfonamide (0.064 mmol), Pd(PPh<sub>3</sub>)<sub>2</sub>Cl<sub>2</sub> (2 mol%) and CuI (2 mol%), triethylamine (1.92 mmol, 3 equiv) was added 3-butyn-1-ol (1.92 mmol, 3 equiv) and the mixture was stirred at 80 °C for 10 h. After completion, as indicated by TLC, the mixture was diluted with EtOAc, filtered through celite and the filtrate was collected and concentrated under vacuum. The resulting residue was purified by column chromatography on silica gel (60-120 mesh) using a gradient mixture of ethyl acetate/hexane to give the compound **3a**. <sup>1</sup>H NMR (400 MHz, CDCl<sub>3</sub>): δ 7.90 (d, *J* = 8.0 Hz, 1H), 7.37 (s, 1H), 7.22 (d, *J* = 8.8 Hz, 1H), 6.22 (s, 1H), 3.89 (t, *J* = 5.4 Hz, 2H), 2.73 (t, *J* = 5.6 Hz, 2H), 2.54 (d, *J* = 5.3 Hz, 3H), 2.38 (s, 3H); <sup>13</sup>C NMR (400 MHz, CDCl<sub>3</sub>): δ 142.7, 138.1, 134.0, 129.4, 128.5, 120.9, 96.5, 78.6, 60.7, 29.3, 23.7, 21.0.

#### General procedure for the preparation of **4**:

An oven dried RB flask was charged with compound **3** (50 mg, 1 equiv) and dissolved in toluene (3 mL) and then was added the respective aldehyde **2** (1.1 equiv) under inert atmosphere. The mixture was cooled to 0 °C and then AgSbF<sub>6</sub> (5 mol%) was added. The resulting mixture was stirred at 25 °C and then heated to 80 °C. After completion, as monitored by TLC, the mixture was quenched with 5 mL of ice water and 5 mL of ethyl acetate. The organic layer was separated and dried over sodium sulfate. Removal of the solvent followed by purification on silica gel (60-120 mesh) using a gradient mixture of ethyl acetate/hexane afforded the corresponding product **4**.

## 2. Spectral data of products (4a-aa)

### 5,9-Dimethyl-1-phenyl-1,3,4,5-tetrahydrobenzo[*e*]pyrano[4,3-*c*][1,2]thiazine-6,6-dioxide (4a; Table 2):

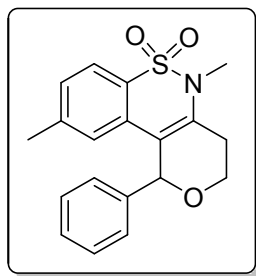

Yield, 91%; Solid; mp 193-195 °C; <sup>1</sup>H NMR (400 MHz, CDCl<sub>3</sub>): δ 7.75 (d, *J* = 8.0 Hz, 1H), 7.39 – 7.34 (m, 2H), 7.33 – 7.24 (m, 3H), 7.17 (d, *J* = 7.5 Hz, 1H), 6.90 (s, 1H), 6.97 (s, 1H), 3.89 –

3.83 (m, 2H), 3.30(s, 3H), 2.81 – 2.72 (m, 1H), 2.64 – 2.56 (m, 1H), 2.25(s, 3H);  $^{13}\text{C}$  NMR (400 MHz,  $\text{CDCl}_3$ ):  $\delta$  142.2, 139.5, 136.7, 131.7, 131.5, 129.1, 128.8, 128.5, 128.3, 128.0, 124.0, 121.6, 115.3, 74.6, 59.2, 30.4, 26.8, 21.8; IR (neat)  $\nu_{\text{max}}$  3422, 2928, 2873, 1609, 1465, 1370, 1321, 1250, 1174, 1126, 1027, 931, 895, 825, 762, 702, 579, 545, 508, 431  $\text{cm}^{-1}$ ; MS (ESI):  $m/z$  342(M+H) $^+$ . HRMS (ESI) calcd for  $\text{C}_{19}\text{H}_{20}\text{NO}_3\text{S}$ : 342.11584 (M+H) $^+$ , found 342.11572.

**5,9-Dimethyl-1-(*o*-tolyl)-1,3,4,5-tetrahydrobenzo[e]pyrano[4,3-*c*][1,2]thiazine-6,6-dioxide (4b; Table 2):**

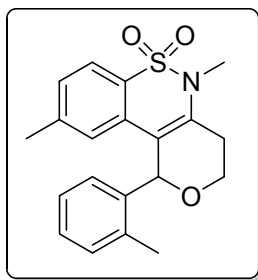

Yield, 90%; Solid; mp 155 - 158  $^{\circ}\text{C}$ ;  $^1\text{H}$  NMR (400 MHz,  $\text{CDCl}_3$ ):  $\delta$  7.75 (d,  $J$  = 8.0 Hz, 1H), 7.25 – 7.22 (m, 1H), 7.20 – 7.15 (m, 2H), 7.10 – 7.01 (m, 2H), 6.75 (s, 1H), 6.17 (s, 1H), 3.85 – 3.81(dd,  $J$  = 4.0 Hz,  $J$  = 7.2 Hz, 2H), 3.31 (s, 3H), 2.84 – 2.24 (m, 1H), 2.62(s, 3H), 2.61 - 2.54(m, 1H), 2.25 (s, 3H);  $^{13}\text{C}$  NMR (400 MHz,  $\text{CDCl}_3$ ):  $\delta$  142.2, 137.5, 137.0, 136.7, 131.5, 130.8, 129.6, 128.9, 128.3, 128.1, 125.8, 123.8, 121.8, 115.8, 71.5, 58.9, 30.5, 27.0, 21.9, 19.1; IR (neat)  $\nu_{\text{max}}$  3450, 2924, 2876, 1617, 1475, 1359, 1323, 1250, 1174, 1119, 1087, 986, 923, 880, 827, 753, 719, 668, 625, 595, 548, 464  $\text{cm}^{-1}$ ; MS (ESI):  $m/z$  356 (M+H) $^+$ . HRMS (ESI) calcd for  $\text{C}_{20}\text{H}_{22}\text{O}_3\text{NS}$ : 356.13149 (M+H) $^+$ , found 356.13155.

**1-(4-Chlorophenyl)-5,9-dimethyl-1,3,4,5-tetrahydrobenzo[e]pyrano[4,3-*c*][1,2]thiazine-6,6-dioxide (4c; Table 2):**

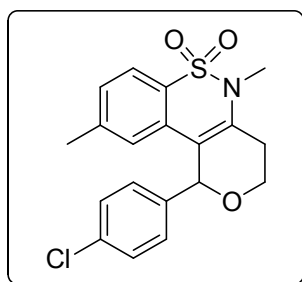

Yield, 95%; mp 198-200 °C; Solid; <sup>1</sup>H NMR (400 MHz, CDCl<sub>3</sub>): δ 7.75(d, *J* = 8.0 Hz, 1H), 7.32 – 7.27(m, 4H), 7.20(d, *J* = 8.0 Hz, 1H), 6.86(s, 1H), 5.94(s, 1H), 3.87 – 3.83(m, 2H), 3.30(s, 3H), 2.80 – 2.72(m, 1H), 2.64 – 2.57(m, 1H), 2.28(s, 3H); <sup>13</sup>C NMR (75 MHz, CDCl<sub>3</sub>): δ 142.3, 138.2, 136.9, 134.2, 131.3, 130.5, 128.9, 128.7, 128.2, 123.8, 121.7, 114.9, 73.9, 59.3, 30.4, 26.7, 21.9; IR (neat)  $\nu_{\max}$  3451, 2965, 2925, 1618, 1596, 1487, 1455, 1412, 1366, 1341, 1295, 1245, 1180, 1131, 1094, 1018, 987, 925, 896, 822, 792, 715, 698, 578, 552, 517, 446 cm<sup>-1</sup>; MS (ESI): *m/z* 376 (M+H)<sup>+</sup>. HRMS (ESI) calcd for C<sub>19</sub>H<sub>19</sub>O<sub>3</sub>N Cl S: 376.07687 (M+H)<sup>+</sup>, found 376.07759.

**1-(4-Fluorophenyl)-5,9-dimethyl-1,3,4,5-tetrahydrobenzo[e]pyrano[4,3-c][1,2]thiazine-6,6-dioxide (4d; Table 2):**

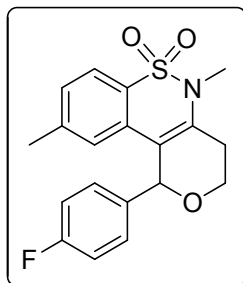

Yield, 90%; Solid; mp 194-195 °C; <sup>1</sup>H NMR (400 MHz, CDCl<sub>3</sub>): δ 7.75 (d, *J* = 8.0 Hz, 1H), 7.36 – 7.31 (m, 2H), 7.19 (d, *J* = 8.8 Hz, 1H), 7.01 – 6.96 (m, 2H), 6.87 (s, 1H), 5.95 (s, 1H), 3.88 – 3.83 (m, 2H), 3.30 (s, 3H), 2.80 – 2.27 (m, 1H), 2.65 – 2.58 (m, 1H), 2.27 (s, 3H); <sup>13</sup>C NMR (400 MHz, CDCl<sub>3</sub>): δ 142.2, 136.8, 135.6, 131.4, 130.9, 130.9, 128.9, 128.2, 123.9, 121.7, 115.6, 115.3, 115.2, 73.9, 59.3, 30.5, 26.8, 21.8; IR (neat)  $\nu_{\max}$  3447, 3055, 2962, 2918, 2859, 1623, 1598, 1568, 1474, 1427, 1364, 1319, 1255, 1173, 1126, 1099, 1068, 1031, 992, 881, 820, 788, 694, 666, 585 cm<sup>-1</sup>; MS (ESI): *m/z* 360 (M+H)<sup>+</sup>. HRMS (ESI) calcd for C<sub>19</sub>H<sub>18</sub>FNO<sub>3</sub>S: 360.10849 (M+H)<sup>+</sup>, found 360.10642.

**1-(3-Bromophenyl)-5,9-dimethyl-1,3,4,5-tetrahydrobenzo[e]pyrano[4,3-c][1,2]thiazine-6,6-dioxide (4e; Table 2):**

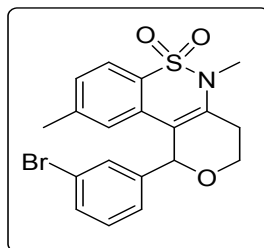

Yield, 88%; Solid; mp 196-198 °C; <sup>1</sup>H NMR (400 MHz, CDCl<sub>3</sub>): δ 7.76 (d, *J* = 8.1 Hz, 1H), 7.60 (s, 1H), 7.43 – 7.38 (m, 1H), 7.24 – 7.12 (m, 3H), 6.88 (m, 3H), 5.93 (s, 1H), 3.88 – 3.81 (m, 2H), 3.31 (s, 3H), 2.83 – 2.71 (m, 1H), 2.65 – 2.55 (m, 1H), 2.29 (s, 3H); <sup>13</sup>C NMR (400 MHz, CDCl<sub>3</sub>): δ 142.4, 141.9, 137.0, 132.3, 131.5, 131.3, 130.1, 128.8, 128.2, 127.7, 123.7, 122.6, 121.8, 114.5, 73.8, 59.2, 30.4, 26.7, 21.9; IR (neat)  $\nu_{\max}$  3447, 3055, 2962, 2918, 2859, 1623, 1598, 1568, 1474, 1427, 1364, 1319, 1255, 1173, 1126, 1099, 1068, 1031, 992, 881, 820, 788, 694, 666, 585 cm<sup>-1</sup>; MS (ESI): *m/z* 420 (M+H)<sup>+</sup>. HRMS (ESI) calcd for C<sub>19</sub>H<sub>19</sub>BrNO<sub>3</sub>S: 420.02818 (M+H)<sup>+</sup>, found 420.02635.

**5,9-Dimethyl-1-(4-nitrophenyl)-1,3,4,5-tetrahydrobenzo[e]pyrano[4,3-c][1,2]thiazine-6,6-dioxide (4f; Table 2):**

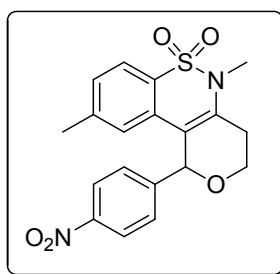

Yield, 78%; Solid; mp 202-204 °C; <sup>1</sup>H NMR (400 MHz, CDCl<sub>3</sub>): δ 8.16 (d, *J* = 8.6 Hz, 2H), 7.77(d, *J* = 8.0 Hz, 1H), 7.54(d, *J* = 8.6 Hz, 2H), 7.22 (d, *J* = 8.6 Hz, 1H), 6.83(s, 1H), 6.04 (s,1H), 3.95 – 3.81 (m, 2H), 3.32 (s, 3H), 2.83 – 2.73 (m, 1H), 2.70 – 2.61 (m,1H), 2.28 (s, 3H); <sup>13</sup>C NMR (400 MHz, CDCl<sub>3</sub>): δ 147.8, 146.8, 142.5, 137.3, 131.1, 130.1, 129.0, 128.4, 123.8, 123.5, 121.9, 114.1, 73.7, 60.0, 30.0, 26.7, 21.8; IR (neat)  $\nu_{\max}$  3448, 2921, 2858, 1614, 1524, 1481, 1349, 1327, 1248, 1175, 1128, 1104, 1065, 1035, 930, 898, 856, 826, 796, 751, 719, 684, 577, 548, 517, 442, 420 cm<sup>-1</sup>; MS (ESI): *m/z* 409 (M+Na)<sup>+</sup>. HRMS (ESI) calcd for C<sub>19</sub>H<sub>18</sub>O<sub>5</sub>N<sub>2</sub>S: 409.08465 (M+Na)<sup>+</sup>, found 409.08286.

**4-(5,9-Dimethyl-6,6-dioxido-1,3,4,5-tetrahydrobenzo[e]pyrano[4,3-c][1,2]thiazin-1-yl)benzotrile (4g; Table 2):**

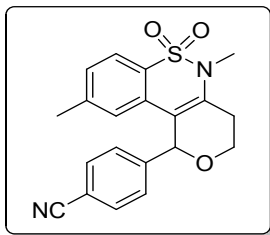

Yield, 81%; mp 180-182 °C; Solid;  $^1\text{H}$  NMR (400 MHz,  $\text{CDCl}_3$ ):  $\delta$  7.76 (d,  $J = 8.0$  Hz, 1H), 7.60 (d,  $J = 8.2$  Hz, 2H), 7.48 (d,  $J = 8.2$  Hz, 2H), 7.22 (d,  $J = 8.0$  Hz, 1H), 6.82(s, 1H), 3.93 – 3.80(m, 2H), 3.32 (s, 3H), 2.80 – 2.73 (m, 1H), 2.28 (s, 3H);  $^{13}\text{C}$  NMR (400 MHz,  $\text{CDCl}_3$ ):  $\delta$  144.9, 142.4, 137.3, 132.4, 131.2, 129.8, 128.9, 128.4, 123.5, 121.8, 118.4, 114.0, 112.2, 74.0, 55.9, 30.4, 26.6, 21.8; IR (neat)  $\nu_{\text{max}}$  3421, 3095, 2987, 2927, 2879, 2228, 1934, 1616, 1506, 1477, 1413, 1365, 1338, 1296, 1245, 1180, 1130, 1098, 1057, 1030, 990, 926, 895, 835, 792, 713, 681, 654, 574, 548, 514, 445  $\text{cm}^{-1}$ ; MS (ESI):  $m/z$  367 (M+H) $^+$ . HRMS (ESI) calcd for  $\text{C}_{20}\text{H}_{19}\text{O}_3\text{N}_2\text{S}$ : 367.11109 (M+H) $^+$ , found 367.11133.

**1-(4-Methoxyphenyl)-5,9-dimethyl-1,3,4,5-tetrahydrobenzo[e]pyrano[4,3-c][1,2]thiazine-6,6-dioxide (4h; Table 2):**

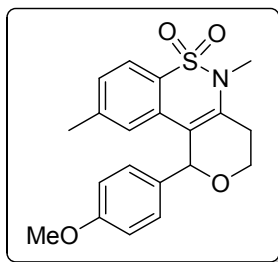

Yield 84%; Solid; mp 116-118 °C;  $^1\text{H}$  NMR (400 MHz,  $\text{CDCl}_3$ ):  $\delta$  7.71(d,  $J = 8.0$  Hz, 1H), 7.24 (m, 1H), 7.16 (d,  $J = 7.9$  Hz, 1H), 7.13 (dd,  $J = 7.5$  Hz, 1H), 6.94 (d,  $J = 8.0$  Hz, 1H), 6.91 (s, 1H), 6.82 (t,  $J = 7.3$  Hz, 1H), 6.47 (s, 1H), 4.00 (s, 3H), 3.96 – 3.84 (m, 2H), 3.29 (s, 3H), 2.80 – 2.72 (m, 1H), 2.66 – 2.59 (m, 1H), 2.26 (s, 1H);  $^{13}\text{C}$  NMR (400 MHz,  $\text{CDCl}_3$ ):  $\delta$  157.4, 142.0, 136.4, 130.5, 130.2, 129.7, 128.9, 128.0, 127.4, 123.9, 121.6, 120.5, 116.0, 110.6, 68.0, 59.3, 55.8, 30.6, 26.8, 21.9; IR (neat)  $\nu_{\text{max}}$  3448, 2954, 2858, 2809, 1612, 1559, 1511, 1472, 1370, 1317, 1292, 1245, 1200, 1174, 1125, 1104, 1065, 1029, 990, 926, 896, 830, 796, 714, 686, 619, 575, 547, 511, 471  $\text{cm}^{-1}$ ; MS (ESI):  $m/z$  372 (M+H) $^+$ . HRMS (ESI) calcd for  $\text{C}_{20}\text{H}_{22}\text{NO}_4\text{S}$ : 372.12641 (M+H) $^+$ , found 372.12795.

**1-(3-Hydroxy-4-methoxyphenyl)-5,9-dimethyl-1,3,4,5-tetrahydrobenzo[e]pyrano[4,3-c][1,2]thiazine-6,6-dioxide (4i; Table 2):**

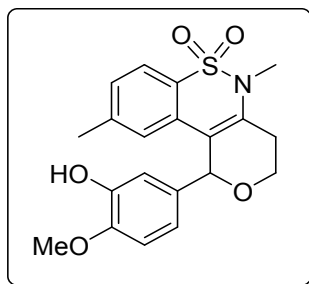

Yield, 76%; Solid; mp 154-155 °C; <sup>1</sup>H NMR (400 MHz, CDCl<sub>3</sub>): δ 7.74 (d, *J* = 8.0 Hz, 1H), 7.18 (d, *J* = 7.4 Hz, 1H), 7.02 (d, *J* = 1.9 Hz, 1H), 6.92 (s, 1H), 6.80 – 6.72 (m, 2H), 6.88 (s, 1H), 5.6 (s, 1H), 3.89 – 3.84 (m, 2H), 3.83 (s, 2H), 3.39 (s, 3H), 2.81 – 2.27 (m, 1H), 2.60 – 2.56 (m, 1H), 2.28 (s, 3H); <sup>13</sup>C NMR (400 MHz, CDCl<sub>3</sub>): δ 146.5, 145.5, 142.2, 136.5, 132.7, 131.6, 128.8, 128.0, 124.0, 121.6, 121.1, 115.5, 115.3, 110.3, 74.0, 58.7, 55.8, 30.5, 26.8, 21.9; IR (neat)  $\nu_{\max}$  3615, 2937, 1622, 1595, 1509, 1444, 1329, 1271, 1233, 1200, 1175, 1126, 1095, 1020, 876, 816, 792, 762, 716, 661, 600, 550, 467 cm<sup>-1</sup>; MS (ESI): *m/z* 388 (M+H)<sup>+</sup>. HRMS (ESI) calcd for C<sub>20</sub>H<sub>22</sub>NO<sub>5</sub>S: 388.12132 (M+H)<sup>+</sup>, found 388.12322.

**5,9-Dimethyl-1-(3-phenoxyphenyl)-1,3,4,5-tetrahydrobenzo[e]pyrano[4,3-c][1,2]thiazine 6,6-dioxide (4j; Table 2):**

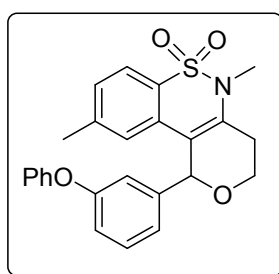

Yield, 85%; Solid; mp 177-179 °C; <sup>1</sup>H NMR (400 MHz, CDCl<sub>3</sub>): δ 7.75 (d, *J* = 7.9 Hz, 1H), 7.32 – 7.18 (m, 4H), 7.13 – 7.03 (m, 3H), 6.96 – 6.92 (d, *J* = 7.9 Hz, 2H), 6.92 – 6.88 (m, 2H), 5.90 (s, 1H), 3.95 – 3.83 (m, 2H), 3.29 (s, 3H), 2.79 – 2.71 (m, 1H), 2.65 – 2.57 (m, 1H), 2.30 (s, 3H); <sup>13</sup>C NMR (400 MHz, CDCl<sub>3</sub>): δ 157.3, 156.9, 142.1, 141.7, 136.8, 131.5, 129.9, 129.6, 128.9, 128.1, 124.0, 123.8, 123.2, 121.8, 119.7, 118.8, 118.7, 115.1, 74.5, 59.5, 30.4, 26.8, 21.9; IR (neat)  $\nu_{\max}$  3448, 3054, 2967, 2864, 1590, 1483, 1449, 1374, 1315, 1247, 1208, 1183, 1128,



1104, 1067, 999, 934, 876, 826, 798, 756, 695, 551, 510, 462  $\text{cm}^{-1}$ ; MS (ESI):  $m/z$  434 (M+H)<sup>+</sup>. HRMS (ESI) calcd for  $\text{C}_{25}\text{H}_{24}\text{NO}_4\text{S}$ : 434.14206 (M+H)<sup>+</sup>, found 434.14117.

**1-(4-Methoxynaphthalen-2-yl)-5,9-dimethyl-1,3,4,5-tetrahydrobenzo[e]pyrano[4,3-c][1,2]thiazine 6,6-dioxide (4k; Table 2):**

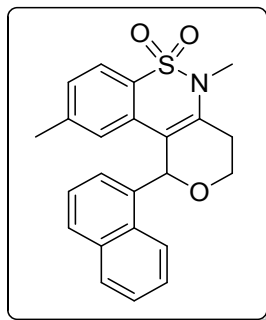

Yield, 87%; Solid; mp 218-220 °C;  $^1\text{H}$  NMR (400 MHz,  $\text{CDCl}_3$ ):  $\delta$  8.52 (d,  $J = 8.4$  Hz, 1H), 7.90 (d,  $J = 8.0$  Hz, 1H), 7.78(d,  $J = 8.0$  Hz, 2H), 7.68 – 7.63(m, 1H), 7.58 – 7.53(m, 1H), 7.33 – 7.25(m, 2H), 7.19 – 7.15 (d,  $J = 8.4$  Hz, 2H), 6.81(d,  $J = 8.4$  Hz, 2H), 3.90 – 3.83 (m, 1H), 3.80 – 3.72 (m, 1H), 3.34 (s, 3H), 2.94 – 2.83 (m, 1H), 2.56 – 2.49 (m, 1H), 2.15 (s, 3H);  $^{13}\text{C}$  NMR (400 MHz,  $\text{CDCl}_3$ ):  $\delta$  142.3, 136.9, 134.1, 132.0, 131.5, 129.1, 128.7, 128.7, 128.4, 128.2, 126.5, 125.7, 125.0, 124.0, 123.5, 115.4, 70.4, 58.4, 30.4, 26.9, 21.8; IR (neat)  $\nu_{\text{max}}$  3424, 3056, 2917, 2888, 1937, 1610, 1599, 1507, 1472, 1399, 1365, 1327, 1294, 1249, 1205, 1179, 1124, 1091, 1045, 980, 927, 877, 829, 779, 736, 709, 682, 664, 637, 592, 553, 517, 466, 440  $\text{cm}^{-1}$ ; MS (ESI):  $m/z$  392 (M+H)<sup>+</sup>. HRMS (ESI) calcd for  $\text{C}_{23}\text{H}_{22}\text{NO}_3\text{S}$  392.13370 (M+H)<sup>+</sup>, found 392.13149.

**1-(4-Methoxynaphthalen-1-yl)-5,9-dimethyl-1,3,4,5-tetrahydrobenzo[e]pyrano[4,3-c][1,2]thiazine-6,6-dioxide (4l; Table 2):**

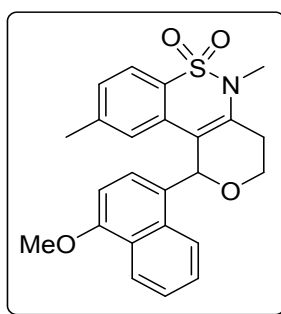

Yield, 85%; Solid; mp 211-213 °C;  $^1\text{H}$  NMR (400 MHz,  $\text{CDCl}_3$ ):  $\delta$  8.34 (d,  $J = 8.5$  Hz, 1H), 7.78 (d,  $J = 8.08$  Hz, 1H), 7.69 – 7.65 (m, 1H), 7.57 – 7.53(m, 1H), 7.19 – 7.16 (m, 2H), 6.85 (s, 1H),

6.73 (s, 1H), 6.03 (d,  $J = 7.9$  Hz, 1H), 3.93 (s, 3H), 3.87 – 3.82 (m, 1H), 3.81 – 3.74 (m, 1H), 3.33 (s, 1H), 2.92 – 2.84 (m, 1H), 2.53 – 2.47 (m, 1H), 2.71 (s, 3H);  $^{13}\text{C}$  NMR (400 MHz,  $\text{CDCl}_3$ ):  $\delta$  155.7, 142.4, 136.7, 132.9, 131.7, 129.0, 128.8, 128.2, 127.0, 126.1, 125.1, 123.6, 122.5, 121.6, 115.8, 102.7, 70.1, 58.0, 55.3, 30.5, 26.9, 21.8; IR (neat)  $\nu_{\text{max}}$  3445, 3046, 2971, 2938, 2859, 1596, 1510, 1479, 1461, 1422, 1386, 1318, 1296, 1265, 1210, 1174, 1155, 1123, 1091, 1062, 1043, 961, 929, 878, 840, 814, 757, 713, 660, 630, 597, 546, 508, 463, 417  $\text{cm}^{-1}$ ; MS (ESI):  $m/z$  422 ( $\text{M}+\text{H}$ ) $^+$ . HRMS (ESI) calcd for  $\text{C}_{24}\text{H}_{24}\text{NO}_4\text{S}$  422.14206 ( $\text{M}+\text{H}$ ) $^+$ , found 422.14344.

**1-(Furan-2-yl)-5,9-dimethyl-1,3,4,5-tetrahydrobenzo[e]pyrano[4,3-c][1,2]thiazine-6,6-dioxide (4m; Table 2):**

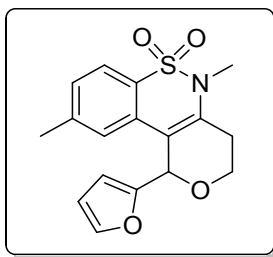

Yield, 84%; Solid; mp 162-163  $^{\circ}\text{C}$ ;  $^1\text{H}$  NMR (400 MHz,  $\text{CDCl}_3$ ):  $\delta$  7.76 (d,  $J = 8.0$  Hz, 1H), 7.44 (s, 1H), 7.23 (d,  $J = 8.0$  Hz, 1H), 6.97 (s, 1H), 6.25 (m, 1H), 6.17 (d,  $J = 3.3$  Hz, 1H), 6.05 (s, 1H), 3.96 – 3.91 (m, 1H), 3.89 – 3.83 (m, 1H), 3.28 (s, 3H), 2.87 – 2.79 (m, 1H), 2.47 – 2.41 (m, 1H), 2.34 (s, 3H);  $^{13}\text{C}$  NMR (400 MHz,  $\text{CDCl}_3$ ):  $\delta$  151.9, 143.1, 142.4, 136.6, 131.2, 128.9, 128.3, 123.2, 121.7, 113.6, 112.2, 110.4, 67.0, 58.2, 30.3, 26.3, 21.8; IR (neat)  $\nu_{\text{max}}$  3449, 3131, 3065, 2985, 2932, 1623, 1596, 1482, 1366, 1325, 1252, 1216, 1176, 1130, 1084, 1020, 929, 876, 822, 758, 712, 648, 596, 547, 430  $\text{cm}^{-1}$ ; MS (ESI):  $m/z$  332 ( $\text{M}+\text{H}$ ) $^+$ . HRMS (ESI) calcd for  $\text{C}_{17}\text{H}_{18}\text{O}_4\text{NS}$ : 332.09511 ( $\text{M}+\text{H}$ ) $^+$ , found 332.09503.

**5,9-Dimethyl-1-(5-nitrothiophen-2-yl)-1,3,4,5-tetrahydrobenzo[e]pyrano[4,3-c][1,2]thiazine-6,6-dioxide (4n; Table 2):**

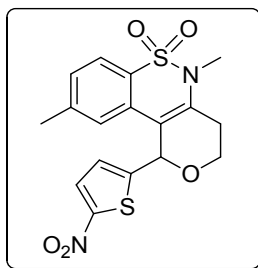

Yield, 80%; Solid; mp 160-161 °C; <sup>1</sup>H NMR (400 MHz, CDCl<sub>3</sub>): δ 7.80 (d, *J* = 7.9 Hz, 1H), 7.68 (d, *J* = 4.1 Hz, 1H), 7.28 (d, *J* = 8.0 Hz, 1H), 7.01 (s, 1H), 6.81 (d, *J* = 4.8 Hz, 1H), 6.16 (s, 1H), 4.04 – 3.97 (m, 1H), 3.92 – 3.84 (m, 1H), 3.31 (s, 3H), 2.90 – 2.79 (m, 1H), 2.48 – 2.45 (dt, *J* = 3.1 Hz, 1H), 2.37 (s, 3H); <sup>13</sup>C NMR (400 MHz, CDCl<sub>3</sub>): δ 152.2, 151.4, 142.8, 137.3, 130.7, 128.7, 128.1, 122.9, 122.0, 113.1, 68.9, 59.0, 30.2, 26.2, 21.9; IR (neat)  $\nu_{\max}$  3447, 3101, 2917, 1610, 1544, 1507, 1478, 1444, 1341, 1292, 1251, 1174, 1122, 1099, 1029, 991, 888, 816, 793, 730, 713, 598, 573, 547, 516, 469 cm<sup>-1</sup>; MS (ESI): *m/z* 393 (M+H)<sup>+</sup>. HRMS (ESI) calcd for C<sub>17</sub>H<sub>17</sub>O<sub>5</sub>N<sub>2</sub>S<sub>2</sub>: 393.05734 (M+H)<sup>+</sup>, found 393.05798.

**5,9-Dimethyl-1-(pyridin-2-yl)-1,3,4,5-tetrahydrobenzo[e]pyrano[4,3-c][1,2]thiazine-6,6-dioxide (4o; Table 2):**

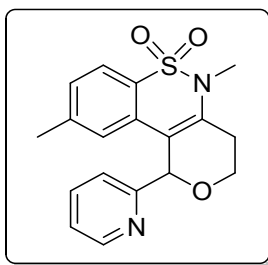

Yield, 79%; Solid; mp 190-192 °C; <sup>1</sup>H NMR (400 MHz, CDCl<sub>3</sub>): δ 8.75 (s, 1H), 8.52 (s, 1H), 7.76 (d, *J* = 8.0 Hz, 1H), 7.56 (td, *J* = 9.6 Hz, 1H), 7.23 – 7.18 (m, 2H), 6.86 (s, 1H), 6.03 (s, 1H), 3.94 – 3.82 (m, 2H), 3.31 (s, 3H), 2.81-2.72 (m, 1H), 2.69 – 2.61 (m, 1H), 2.27 (s, 3H); <sup>13</sup>C NMR (400 MHz, CDCl<sub>3</sub>): δ 150.7, 149.5, 142.4, 137.3, 136.3, 135.4, 131.1, 129.0, 128.3, 123.7, 123.5, 121.8, 114.2, 72.6, 59.7, 30.5, 26.7, 21.8; IR (neat)  $\nu_{\max}$  3448, 2919, 2870, 1600, 1478, 1426, 1370, 1312, 1251, 1180, 1129, 1104, 1063, 1025, 990, 930, 826, 796, 717, 689, 614, 551 cm<sup>-1</sup>; MS (ESI): *m/z* 343 (M+H)<sup>+</sup>. HRMS (ESI) calcd for C<sub>18</sub>H<sub>19</sub>N<sub>2</sub>O<sub>3</sub>S: 343.11109 (M+H)<sup>+</sup>, found 343.11118.

**(E)-5,9-Dimethyl-1-styryl-1,3,4,5-tetrahydrobenzo[e]pyrano[4,3-c][1,2]thiazine-6,6-dioxide**  
**(4p; Table 2):**

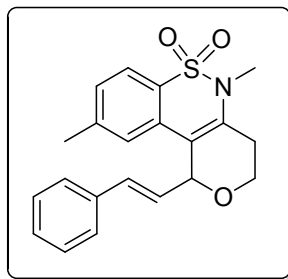

Yield, 91%; Solid; mp 132-136 °C; <sup>1</sup>H NMR (400 MHz, CDCl<sub>3</sub>): δ 7.78 (d, *J* = 8.2 Hz, 1H), 7.73 – 7.18 (m, 6H), 7.15 (s, 1H), 6.58 – 6.49 (d, *J* = 16.2 Hz, 1H), 6.40 – 6.29 (dd, *J* = 5.2 Hz, 1H), 5.63 (d, *J* = 4.9 Hz, 1H), 4.13 – 4.03 (m, 1H), 3.98 – 3.90 (m, 1H), 3.27 (s, 3H), 2.84 – 2.71 (m, 1H), 2.54 – 2.44 (m, 1H), 2.39 (s, 1H); <sup>13</sup>C NMR (400 MHz, CDCl<sub>3</sub>): δ 142.3, 136.3, 136.1, 136.0, 131.4, 128.9, 128.4, 128.2, 128.0, 126.8, 126.7, 123.8, 121.8, 115.2, 71.5, 58.6, 30.3, 26.7, 21.9; IR (neat)  $\nu_{\max}$  3749, 3449, 3026, 2977, 2917, 2865, 1603, 1482, 1452, 1368, 1319, 1247, 1176, 1124, 1086, 1065, 964, 883, 807, 753, 691, 589, 547, 461 cm<sup>-1</sup>; MS (ESI): *m/z* 368 (M+H)<sup>+</sup>. HRMS (ESI) calcd for C<sub>21</sub>H<sub>22</sub>O<sub>3</sub>NS: 368.13149 (M+H)<sup>+</sup>, found 368.13197.

**1,5,9-Trimethyl-1,3,4,5-tetrahydrobenzo[e]pyrano[4,3-c][1,2]thiazine-6,6-dioxide** (4q;  
**Table 2):**

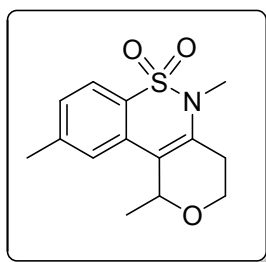

Yield, 75%; Solid; mp 138-139 °C; <sup>1</sup>H NMR (400 MHz, CDCl<sub>3</sub>): δ 7.76 (d, *J* = 7.9 Hz, 1H), 7.27 (d, *J* = 7.9 Hz, 1H), 7.13 (s, 1H), 5.14 – 5.08 (m, 1H), 4.15 – 4.05 (m, 1H), 3.85 – 3.79 (m, 1H), 3.20 (s, 3H), 2.68 – 2.60 (m, 1H), 2.56 – 2.50 (m, 1H), 2.45 (s, 3H), 1.44 (d, *J* = 6.4 Hz, 3H); <sup>13</sup>C NMR (400 MHz, CDCl<sub>3</sub>): δ 142.2, 135.0, 131.8, 129.4, 128.0, 123.5, 122.0, 118.7, 69.1, 60.6, 30.6, 26.8, 21.9, 20.5; IR (neat)  $\nu_{\max}$  3421, 2982, 2939, 2894, 2856, 2830, 1733, 1599, 1558, 1473, 1367, 1327, 1247, 1177, 116, 1112, 1075, 1036, 921, 865, 828, 781, 689, 548, 568, 491,

461, 421  $\text{cm}^{-1}$ ; MS (ESI):  $m/z$  280 ( $\text{M}+\text{H}$ )<sup>+</sup>. HRMS (ESI) calcd for  $\text{C}_{14}\text{H}_{18}\text{O}_3\text{NS}$ : 280.10019 ( $\text{M}+\text{H}$ )<sup>+</sup>, found 280.09989.

**1-Isobutyl-5,9-dimethyl-1,3,4,5-tetrahydrobenzo[e]pyrano[4,3-c][1,2]thiazine-6,6-dioxide**  
(4r; Table 2):

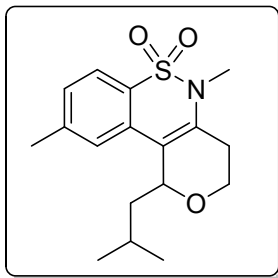

Yield, 81%; Solid; mp 127-129 °C;  $^1\text{H}$  NMR (400 MHz,  $\text{CDCl}_3$ ):  $\delta$  7.76(d,  $J$  = 8.0 Hz, 1H), 7.26 (d,  $J$  = 7.9 Hz, 1H), 7.10 (s, 1H), 5.03 (d,  $J$  = 8.6 Hz, 1H), 4.11 – 4.05 (m, 1H), 3.84 -3.78 (m, – 1H), 3.20 (s, 3H), 2.59 – 2.55 (m, 2H), 2.45 (s, 3H), 2.00 – 1.92 (m, 1H), 1.73 – 1.66 (m, 1H), 1.49 – 1.43 (m, 1H), 1.07 (d,  $J$  = 6.5 Hz, 3H), 0.91 (d,  $J$  = 6.8 Hz, 3H);  $^{13}\text{C}$  NMR (400 MHz,  $\text{CDCl}_3$ ):  $\delta$  142.1, 135.0, 131.7, 129.3, 127.9, 123.5, 122.0, 118.7, 70.7, 59.8, 42.4, 30.5, 26.7, 24.6, 23.7, 21.9, 21.3; IR (neat)  $\nu_{\text{max}}$  3448, 2951, 2869, 2838, 1616, 1597, 1462, 1365, 1317, 1247, 1174, 1113, 1073, 1036, 968, 895, 839, 807, 701, 630, 576, 547, 509, 468, 436, 407  $\text{cm}^{-1}$ ; MS (ESI):  $m/z$  322 ( $\text{M}+\text{H}$ )<sup>+</sup>. HRMS (ESI) calcd for  $\text{C}_{17}\text{H}_{23}\text{O}_3\text{NS}$ : 322.14695 ( $\text{M}+\text{H}$ )<sup>+</sup>, found 322.14714.

**1-Cyclohexyl-5,9-dimethyl-1,3,4,5-tetrahydrobenzo[e]pyrano[4,3-c][1,2]thiazine-6,6-dioxide**  
(4s; Table 2):

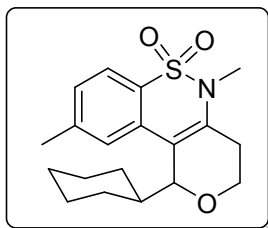

Yield, 77%; Solid; mp 158-160 °C;  $^1\text{H}$  NMR (400 MHz,  $\text{CDCl}_3$ ):  $\delta$  7.75 (d,  $J$  = 8.0 Hz, 1H), 7.26 (d,  $J$  = 7.8 Hz, 1H), 7.12 (s, 1H), 4.85 (d,  $J$  = 2.2 Hz, 1H), 4.14 (dd,  $J$  = 1.7 Hz, 1H), 3.66 (td,  $J$  = 3.0 Hz,  $J$  = 7.8 Hz, 1H), 3.18 (s, 3H), 2.77-2.66 (m, 1H), 2.46 (s, 3H), 2.40-2.33 (m, 1H), 1.80 – 1.68 (m, 3H), 1.64 – 1.39 (m, 5H), 1.26 – 1.01 (m, 2H), 1.00 – 0.88(m, 1H);  $^{13}\text{C}$  NMR (400

MHz, CDCl<sub>3</sub>):  $\delta$ 141.8, 136.3, 132.3, 129.3, 127.8, 123.8, 122.0, 117.0, 62.1, 41.7, 30.8, 30.1, 26.8, 26.3, 26.1, 24.6, 22.0; IR (neat)  $\nu_{\max}$  3450, 2926, 2856, 1609, 1453, 1332, 1247, 1174, 1125, 1032, 898, 866, 803, 696, 578, 551, 514, 445 cm<sup>-1</sup>; MS (ESI):  $m/z$  348 (M+H)<sup>+</sup>. HRMS (ESI) calcd for C<sub>19</sub>H<sub>25</sub>O<sub>3</sub>NS: 348.16299 (M+H)<sup>+</sup>, found 348.16279.

**5-Ethyl-9-methyl-1-(p-tolyl)-1,3,4,5-tetrahydrobenzo[e]pyrano[4,3-c][1,2]thiazine-6,6-dioxide (4t; Table 3):**

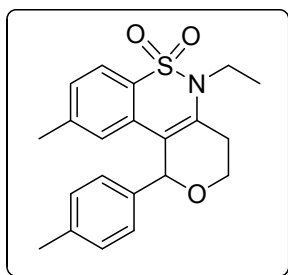

Yield, 92%; Solid; mp 172-174 °C; <sup>1</sup>H NMR (400 MHz, CDCl<sub>3</sub>):  $\delta$  7.72 (d,  $J$  = 7.9 Hz, 1H), 7.24 (d,  $J$  = 8.0 Hz, 1H), 7.17 (d,  $J$  = 7.5 Hz, 1H), 7.10 (d,  $J$  = 7.9 Hz, 2H), 6.92(s, 1H), 5.96(s, 1H), 3.96 – 3.81(m, 3H), 3.77 – 3.3.67(m, 1H), 2.81 – 2.72(m, 1H), 2.62 – 2.55(m, 1H), 2.29(s, 3H), 2.76(s, 3H), 1.12(t,  $J$  = 7.0 Hz, 3H); <sup>13</sup>C NMR (400 MHz, CDCl<sub>3</sub>):  $\delta$  141.9, 138.1, 136.6, 133.4, 131.5, 130.2, 129.0, 128.2, 124.3, 117.8, 74.5, 59.1, 40.5, 26.8, 21.8, 21.1, 15.1; IR (neat)  $\nu_{\max}$  3449, 2975, 2917, 2865, 1916, 1607, 1559, 1511, 1474, 1454, 1377, 1322, 1225, 1173, 1122, 1100, 991, 930, 904, 819, 769, 680, 658, 617, 577, 545, 510, 484 cm<sup>-1</sup>; MS (ESI):  $m/z$  370 (M+H)<sup>+</sup>. HRMS (ESI) calcd for C<sub>21</sub>H<sub>24</sub>NO<sub>3</sub>S 370.14714 (M+H)<sup>+</sup>, found 370.14778.

**5-Ethyl-9-methyl-1-(3,4,5-trimethoxyphenyl)-1,3,4,5-tetrahydrobenzo[e]pyrano[4,3-c][1,2]thiazine-6,6-dioxide (4u; Table 3):**

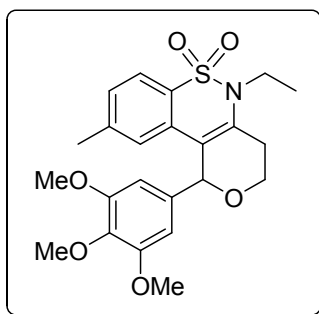

Yield, 88%; Solid; mp 149-151 °C; <sup>1</sup>H NMR (400 MHz, CDCl<sub>3</sub>): δ 7.71 (d, *J* = 7.9 Hz, 1H), 7.2 (d, *J* = 8.0 Hz, 1H), 6.97(s, 1H), 6.60 (s, 1H), 5.94(s, 1H), 4.02 – 3.86(m, 3H), 3.79 (s, 3H), 3.79 (s, 3H), 3.77 (s, 6H), 3.74 – 3.65 (s, 1H), 2.77 – 2.61 (m, 2H), 2.31 (s, 3H), 1.10 (t, *J* = 7.0 Hz 3H); <sup>13</sup>C NMR (400 MHz, CDCl<sub>3</sub>): δ 153.1, 142.0, 137.6, 135.6, 135.2, 131.71, 130.3, 128.3, 124.1, 121.1, 118.1, 106.0, 75.0, 60.6, 60.0, 56.0, 40.5, 26.7, 21.8, 15.0; IR (neat)  $\nu_{\max}$  3447, 2981, 2939, 2885, 2835, 1614, 1592, 1504, 1462, 1423, 1314, 1228, 1203, 1173, 1122, 1057, 1011, 922, 885, 824, 779, 726, 691, 590, 548, 495 cm<sup>-1</sup>; MS (ESI): *m/z* 446 (M+H)<sup>+</sup>. HRMS (ESI) calcd for C<sub>23</sub>H<sub>28</sub>NO<sub>3</sub>S: 446.16318 (M+H)<sup>+</sup>, found 446.16423.

**5-Ethyl-9-methyl-1-(p-tolyl)-1,3,4,5-tetrahydrobenzo[e]pyrano[4,3-c][1,2]thiazine-6,6-dioxide (4v; Table 3):**

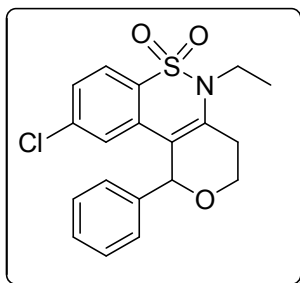

Yield, 94%; Solid; mp 182-184 °C; <sup>1</sup>H NMR (400 MHz, CDCl<sub>3</sub>): δ 7.77 (d, *J* = 8.3 Hz, 1H), 7.36 – 7.27(m, 6H), 7.09 (d, *J* = 1.83 Hz, 1H), 5.92(s,1H), 3.98 – 3.84(m, 3H), 3.81 – 3.71(m, 1H), 2.82 – 2.72(m, 1H), 2.69 – 2.61(m, 1H), 1.15(t, *J* = 7.0 Hz, 3H); <sup>13</sup>C NMR (400 MHz, CDCl<sub>3</sub>): δ 139.0, 137.9, 137.1, 133.1, 130.7, 129.0, 128.7, 128.6, 127.4, 123.9, 122.9, 116.8, 74.9, 59.5, 40.6, 26.5, 15.3; IR (neat)  $\nu_{\max}$  3059, 2976, 2930, 2869, 1901, 1611, 1583, 1546, 1493, 1459, 1397, 1371, 1351, 1328, 1279, 1228, 1209, 1174, 1125, 1093, 1063, 1037, 935, 874, 757, 701, 648, 598, 574, 517, 424 cm<sup>-1</sup>; MS (ESI): *m/z* 376 (M+H)<sup>+</sup>. HRMS (ESI) calcd for C<sub>19</sub>H<sub>18</sub>ClNO<sub>3</sub>S 376.07759 (M+H)<sup>+</sup>, found 376.07687.

**5-Benzyl-1-(4-chlorophenyl)-9-methyl-1,3,4,5-tetrahydrobenzo[e]pyrano[4,3-c][1,2]thiazine-6,6-dioxide (4w; Table 3):**

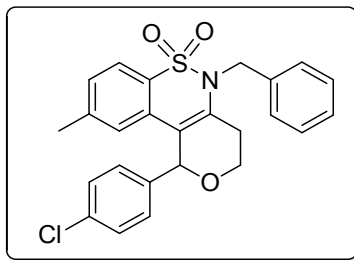

Yield, 93%; Solid; mp 156-158 °C;  $^1\text{H NMR}$  (400 MHz,  $\text{CDCl}_3$ ):  $\delta$  7.79 (d,  $J = 7.9$  Hz, 1H), 7.29 – 7.20 (m, 8H), 7.107 – 7.07(m, 2H), 6.81 (s, 1H), 5.86 (s, 1H), 5.08 (d,  $J = 16.7$  Hz, 1H), 4.92 (d,  $J = 16.7$  Hz, 1H), 3.76 – 3.67 (m, 2H), 2.62 – 2.50 (m, 2H), 2.27 (s, 3H);  $^{13}\text{C NMR}$  (400 MHz,  $\text{CDCl}_3$ ):  $\delta$  142.2, 138.2, 136.2, 136.1, 134.2, 131.3, 130.4, 130.0, 128.7, 128.7, 128.4, 127.6, 126.7, 124.2, 128.6, 117.0, 74.1, 59.4, 48.5, 27.0, 21.9; IR (neat)  $\nu_{\text{max}}$  3058, 2960, 2890, 1618, 1597, 1486, 1449, 1412, 1359, 1327, 1221, 1176, 1142, 1086, 1059, 993, 904, 862, 828, 734, 690, 657, 595, 550, 471, 446  $\text{cm}^{-1}$ ; MS (ESI):  $m/z$  452 ( $\text{M}+\text{H}$ ) $^+$ . HRMS (ESI) calcd for  $\text{C}_{25}\text{H}_{22}\text{ClNO}_3\text{S}$ : 452.10976 ( $\text{M}+\text{H}$ ) $^+$ , found 452.10817.

**5-Benzyl-9-methyl-1-pentyl-1,3,4,5-tetrahydrobenzo[e]pyrano[4,3-c][1,2]thiazine-6,6-dioxide (4x; Table 3):**

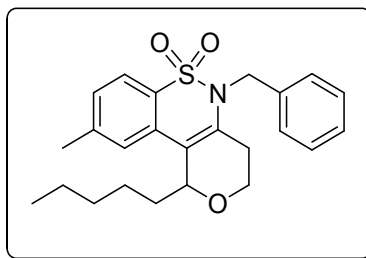

Yield, 78%; Solid; mp 122-124 °C;  $^1\text{H NMR}$  (400 MHz,  $\text{CDCl}_3$ ):  $\delta$  7.79 (d,  $J = 8.0$  Hz, 1H), 7.28 (d,  $J = 8.08$  Hz, 1H), 7.22 – 7.17 (m, 3H), 7.09(s, 1H), 7.04 – 7.01 (m, 2H), 5.02 (d,  $J = 16.8$  Hz, 1H), 4.95 – 4.91 (m, 1H), 4.78 (d,  $J = 16.8$  Hz, 1H), 4.01 – 3.95 (m, 1H), 3.62 – 3.55 (m, 1H), 2.60 – 2.51 (m, 1H), 2.46 (s, 1H), 2.36 – 2.28 (m, 1H), 1.77 – 1.64 (m, 2H), 1.46 – 1.37 (m, 2H), 1.30 – 1.19 (m, 4H), 0.84 (t,  $J = 6.96$  Hz, 3H);  $^{13}\text{C NMR}$  (400 MHz,  $\text{CDCl}_3$ ):  $\delta$  142.0, 136.4, 134.6, 131.9, 130.4, 128.6, 128.1, 127.4, 126.5, 123.7, 121.9, 119.4, 72.8, 60.7, 48.4, 33.9, 31.5, 27.0, 24.4, 22.5, 22.0, 13.9; IR (neat)  $\nu_{\text{max}}$  3418, 3026, 2931, 2860, 1609, 1557, 1456, 1410, 1358, 1316, 1175, 1140, 1114, 1075, 1029, 913, 878, 795, 746, 693, 641, 593, 555, 512, 474  $\text{cm}^{-1}$ ; MS (ESI):  $m/z$  412 ( $\text{M}+\text{H}$ ) $^+$ . HRMS (ESI) calcd for  $\text{C}_{24}\text{H}_{30}\text{O}_3\text{NS}$ : 412.19377 ( $\text{M}+\text{H}$ ) $^+$ , found 412.19409.



**5-Methyl-1,9-diphenyl-1,3,4,5-tetrahydrobenzo[e]pyrano[4,3-c][1,2]thiazine-6,6-dioxide (4y)**  
**Table 3):**

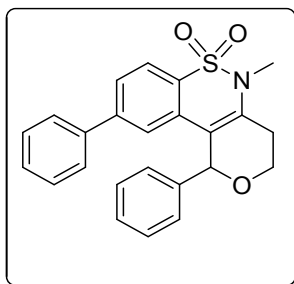

Yield, 90%; Solid; mp 194-196 °C; <sup>1</sup>H NMR (400 MHz, CDCl<sub>3</sub>): δ 7.91 (d, *J* = 8.1 Hz, 1H), 7.55 (d, *J* = 8.1 Hz, 1H), 7.43 – 7.36 (m, 12H), 6.02 (s, 1H), 4.00 – 3.86 (m, 2H), 3.35 (s, 3H), 2.80 – 2.66 (m, 2H); <sup>13</sup>C NMR (400 MHz, CDCl<sub>3</sub>): δ 144.6, 139.6, 139.5, 137.1, 131.9, 129.9, 129.8, 128.6, 128.5, 128.2, 127.2, 126.0, 122.8, 122.2, 115.6, 75.1, 59.7, 30.6, 26.9; IR (neat)  $\nu_{\max}$  3447, 3030, 2970, 2925, 2881, 1612, 1594, 1550, 1474, 1453, 1400, 1375, 1314, 1289, 1258, 1232, 1170, 1123, 1097, 1027 995, 906, 872, 847, 825, 787, 767, 747, 710, 678, 625, 587, 547, 523, 480, 417 cm<sup>-1</sup>; MS (ESI): *m/z* 404 (M+H)<sup>+</sup>. HRMS (ESI) calcd for C<sub>24</sub>H<sub>22</sub>NO<sub>3</sub>S: 404.13327 (M+H)<sup>+</sup>, found 404.13149.

**5-Methyl-9-phenyl-1-(*m*-tolyl)-1,3,4,5-tetrahydrobenzo[e]pyrano[4,3-c][1,2]thiazine-6,6-dioxide (4z; Table 3):**

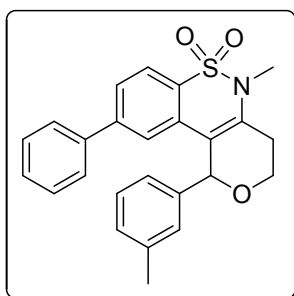

Yield, 91%; Solid; mp 174-176 °C; <sup>1</sup>H NMR (400 MHz, CDCl<sub>3</sub>): δ 7.91 (d, *J* = 8.2 Hz, 1H), 7.55 (dd, *J* = 8.19 Hz, 1H), 7.42 – 7.34 (m, 3H), 7.32 – 7.25 (m, 5H), 7.12 (d, *J* = 7.94 Hz, 2H), 6.99 (s, 1H), 3.99 – 3.84 (m, 2H), 3.34 (s, 3H), 2.82 – 2.73 (m, 1H), 2.71 – 2.62 (m, 1H), 2.29 (s, 3H); <sup>13</sup>C NMR (400 MHz, CDCl<sub>3</sub>): δ 144.5, 139.6, 138.2, 136.9, 136.6, 132.0, 130.0, 129.3, 129.0, 128.8, 128.1, 127.2, 125.9, 122.8, 122.2, 115.8, 74.8, 59.4, 30.6, 26.8, 21.1; IR (neat)  $\nu_{\max}$

3419, 3030, 2967, 2922, 2873, 1716, 1616, 1595, 1553, 1507, 1471, 1400, 1317, 126,1230, 1173, 1124, 1093, 1063, 1024, 993, 871, 830, 766,705, 674, 578, 547, 519, 483, 421  $\text{cm}^{-1}$ ; MS (ESI):  $m/z$  418 (M+H)<sup>+</sup>. HRMS (ESI) calcd for  $\text{C}_{25}\text{H}_{24}\text{NO}_3\text{S}$ : 418.14614 (M+H)<sup>+</sup>, found 418.14714.

**1-(4-Chlorophenyl)-5-methyl-1,3,4,5-tetrahydronaphtho[2,3-*e*]pyrano[4,3-*c*][1,2]thiazine-6,6-dioxide (4aa; Table 3):**

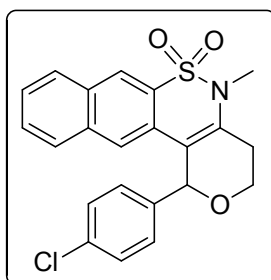

Yield, 85%; Solid; mp 250-252 °C; <sup>1</sup>H NMR (400 MHz,  $\text{CDCl}_3$ ):  $\delta$  8.10 (d,  $J = 8.4$  Hz, 1H), 7.98 (d,  $J = 7.9$  Hz, 1H), 7.86 (d,  $J = 8.5$  Hz, 1H), 7.77(d,  $J = 8.2$  Hz, 1H), 7.65 – 7.55 (m, 2H), 7.30 (d,  $J = 8.4$  Hz, 2H), 7.20 (d,  $J = 8.4$  Hz, 2H), 6.29 (s, 1H), 4.68 – 4.54 (m, 2H), 3.62 – 3.52 (m, 1H), 3.42 – 3.32 (m, 1H), 2.93 (s, 3H); <sup>13</sup>C NMR (400 MHz,  $\text{CDCl}_3$ ):  $\delta$  138.1, 136.1, 135.6, 134.2, 133.8, 132.9, 132.5, 129.8, 129.5, 128.7, 128.3, 128.1, 127.2, 126.9, 124.5, 116.0, 100.2, 69.3, 31.3, 24.3; IR (neat)  $\nu_{\text{max}}$  3448, 3065, 2900, 1589, 1491, 1440, 1406, 194, 1248, 1203, 1170, 1135, 1089, 1027, 991, 954, 888, 860, 838, 810, 786, 748, 681, 637, 618, 552, 514, 457, 407  $\text{cm}^{-1}$ ; MS (ESI):  $m/z$  412 (M+H)<sup>+</sup>. HRMS (ESI) calcd for  $\text{C}_{22}\text{H}_{19}\text{O}_3\text{NCIS}$ : 412.07854 (M+H)<sup>+</sup>, found 412.07687.

### 3. $^1\text{H}$ & $^{13}\text{C}$ NMR spectra of products

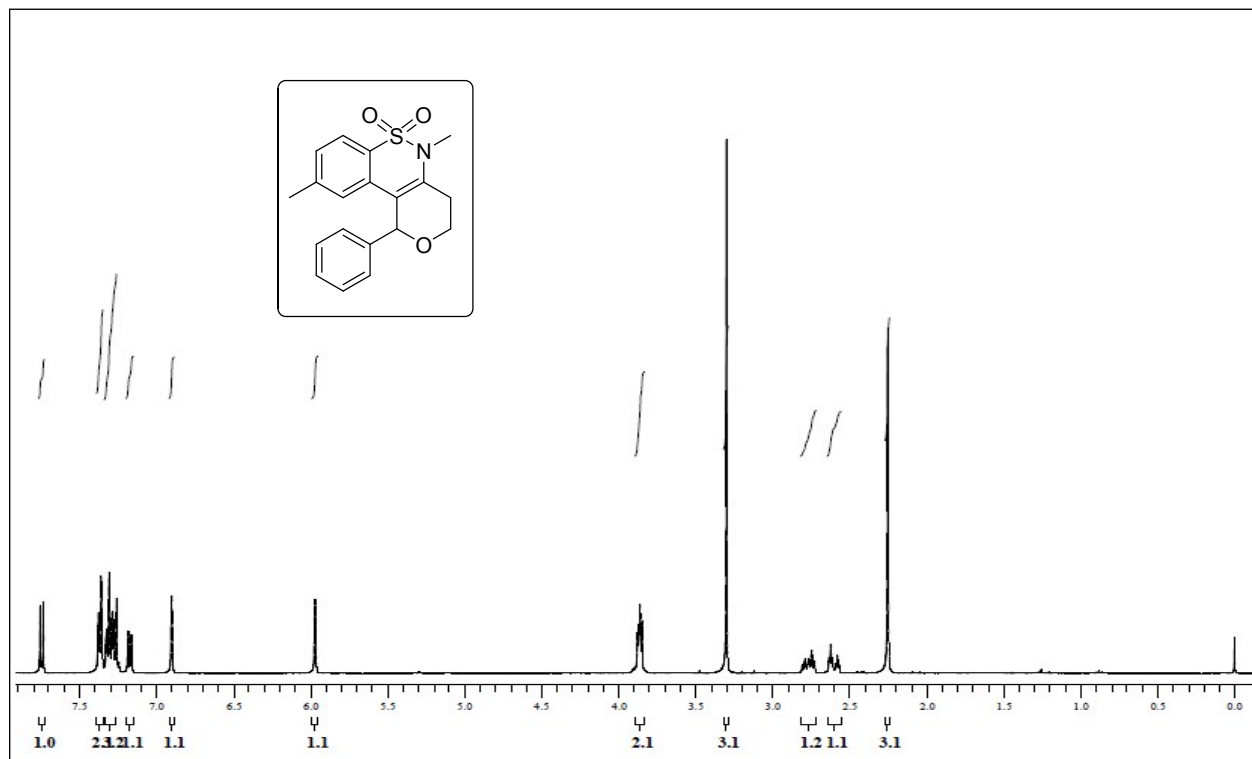

$^1\text{H}$  NMR of Compound 4a

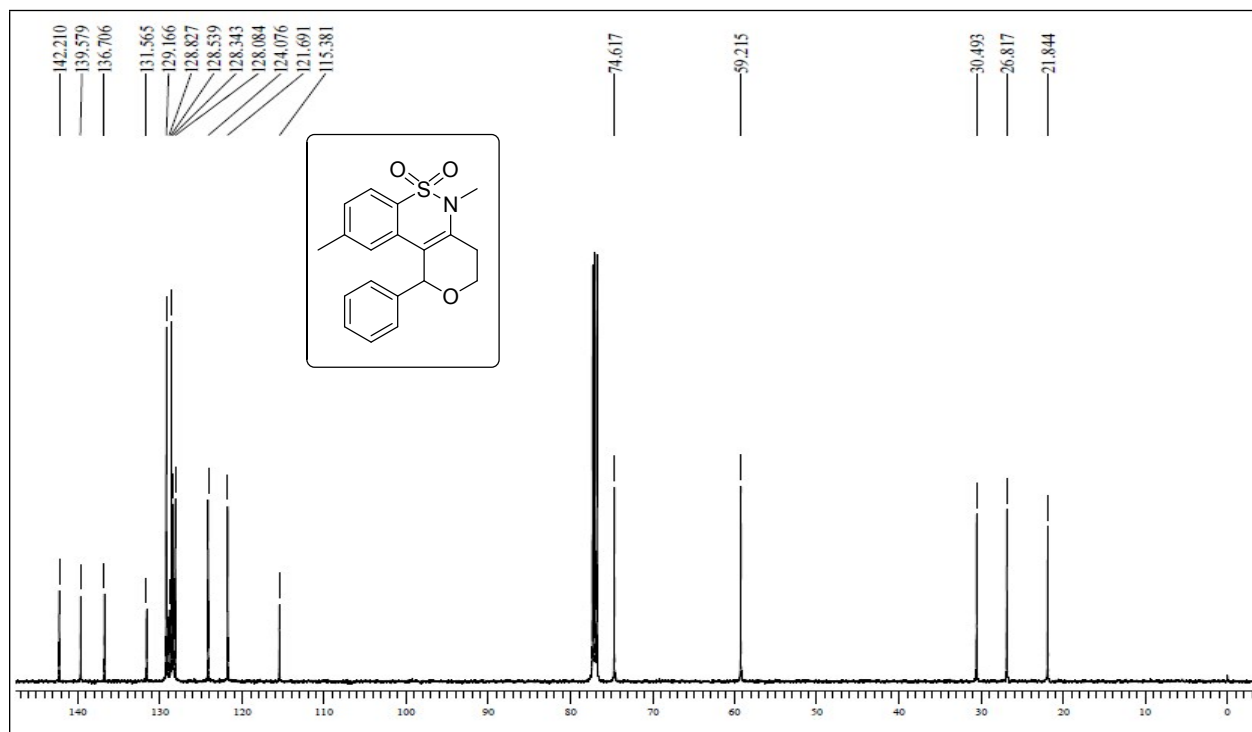

$^{13}\text{C}$  NMR of Compound 4a

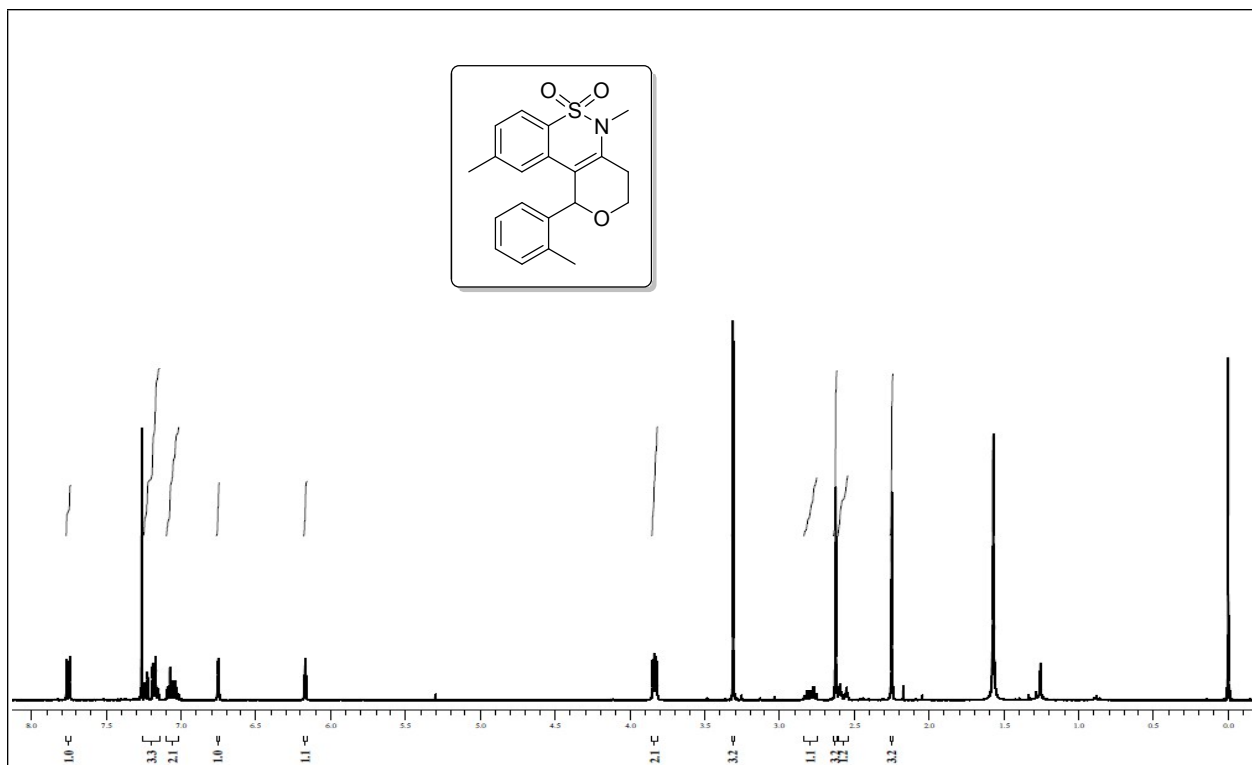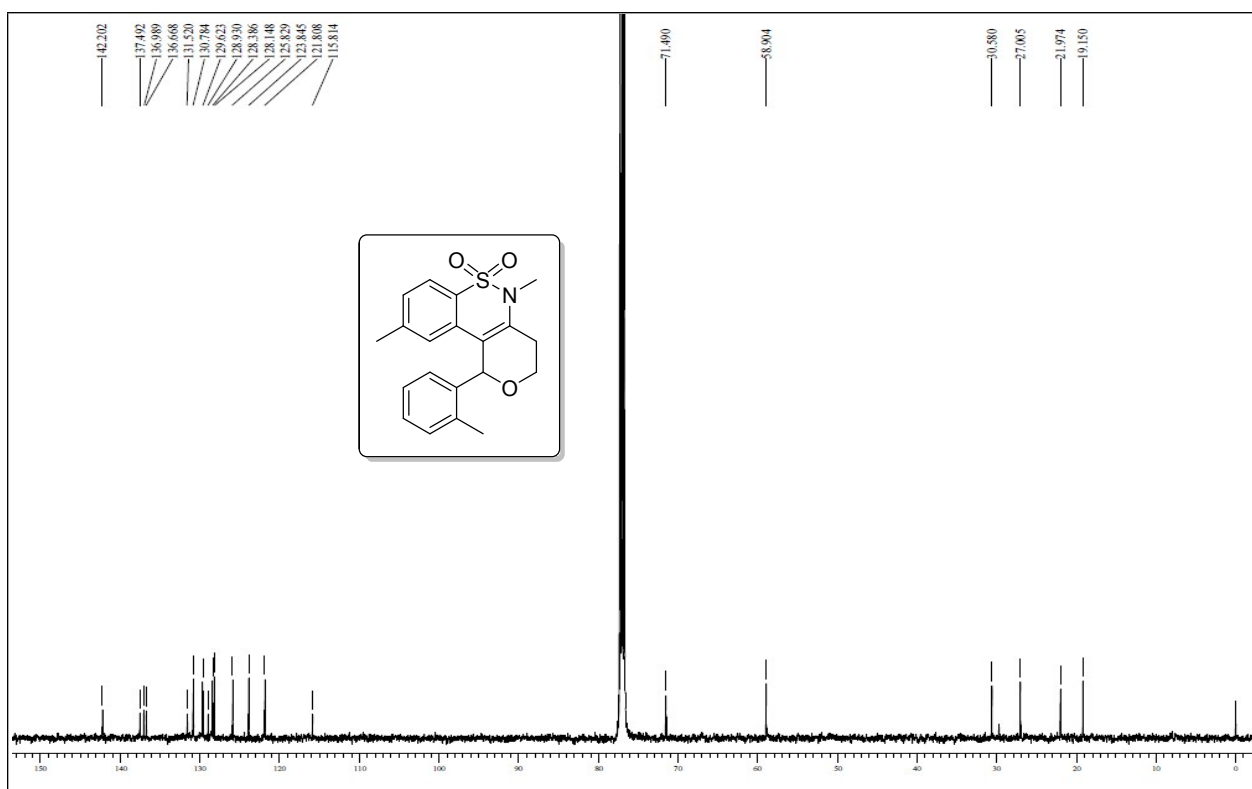

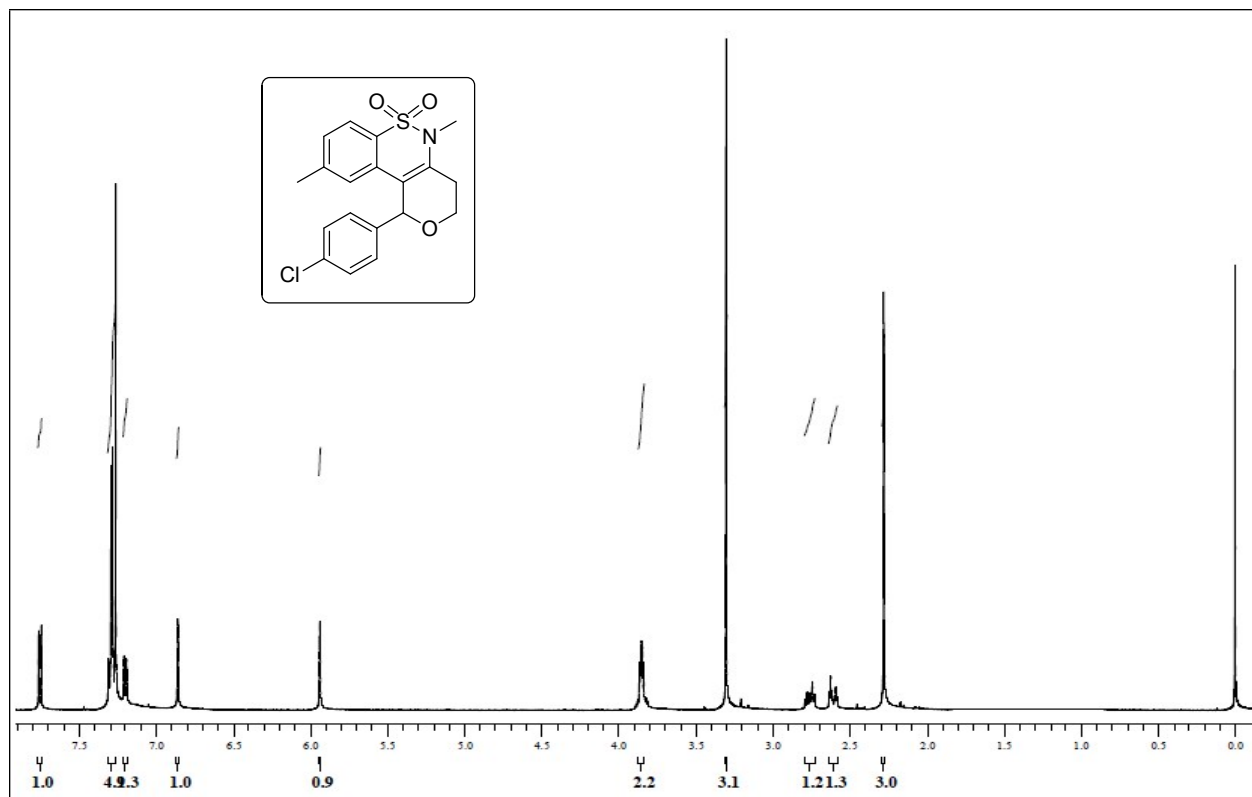

**<sup>1</sup>H NMR of Compound 4c**

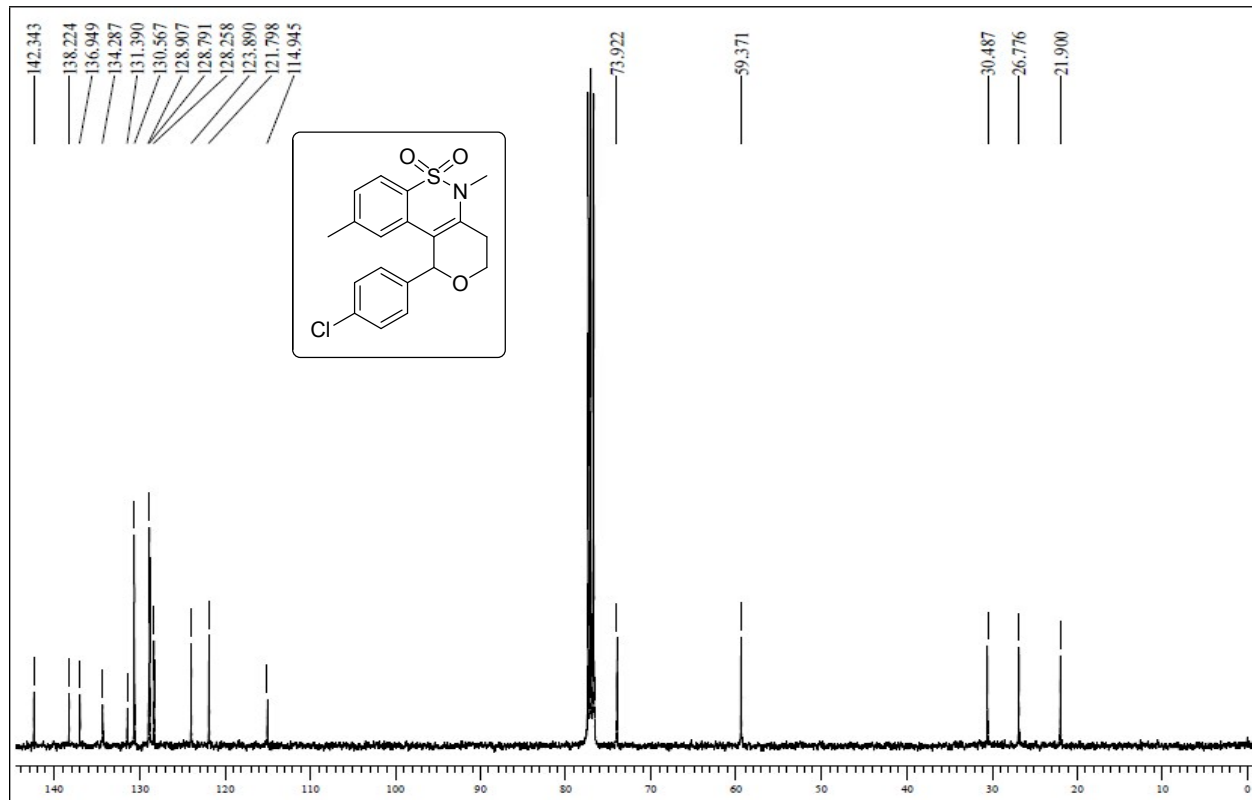

**<sup>13</sup>C NMR of Compound 4c**

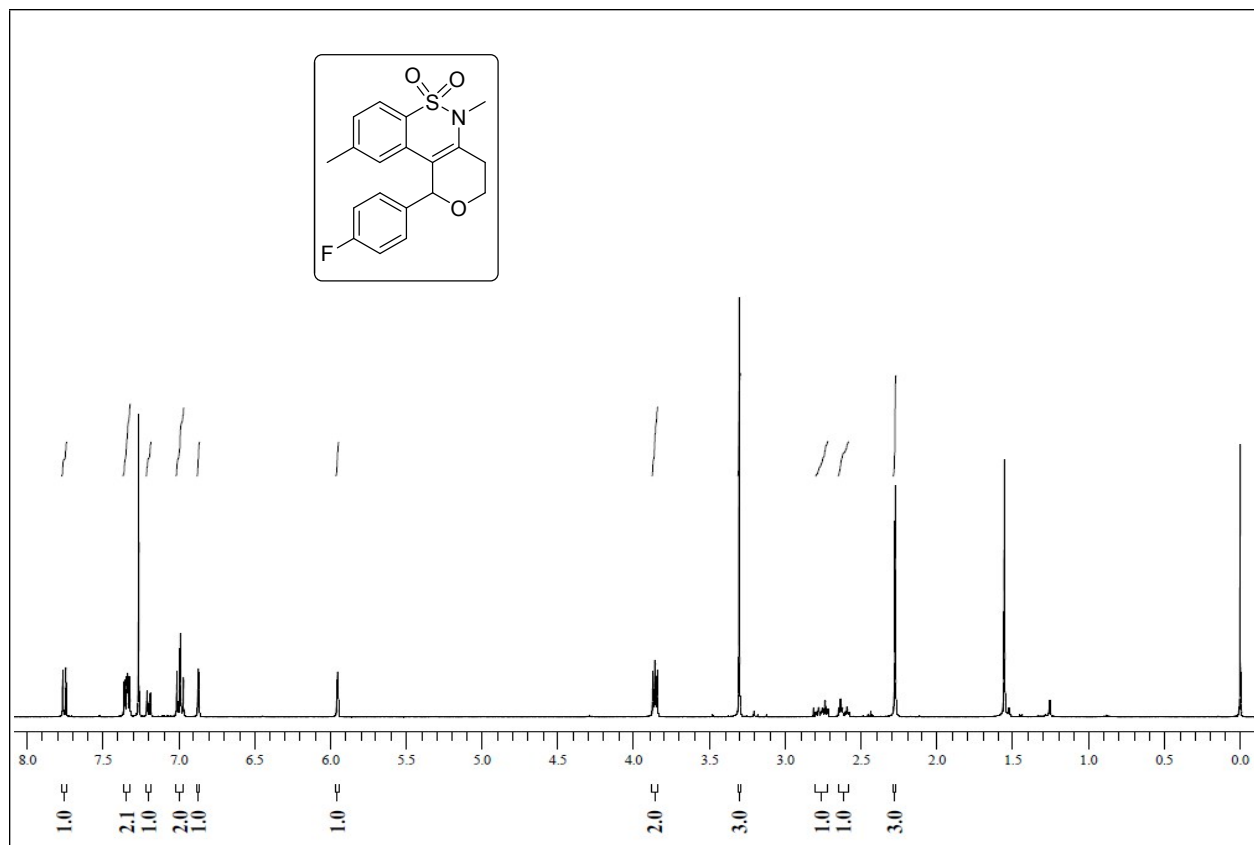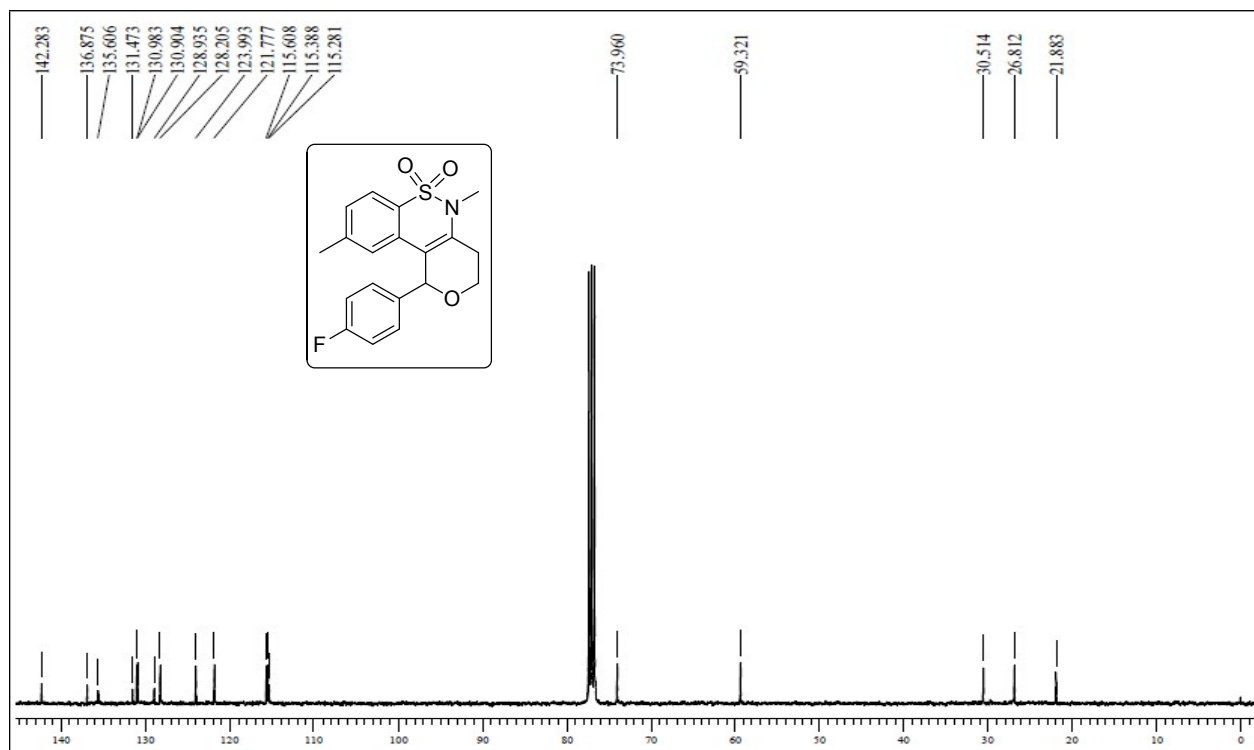

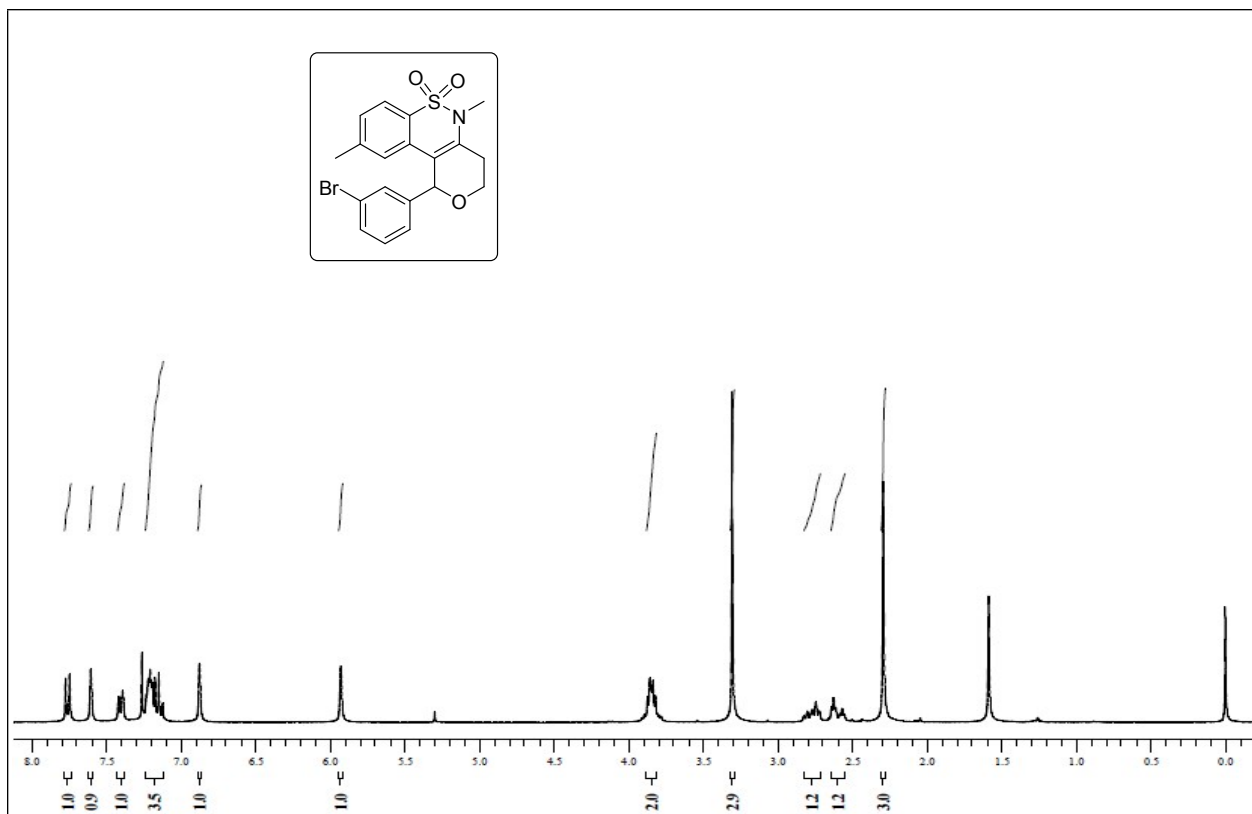

**<sup>1</sup>H NMR of Compound 4e**

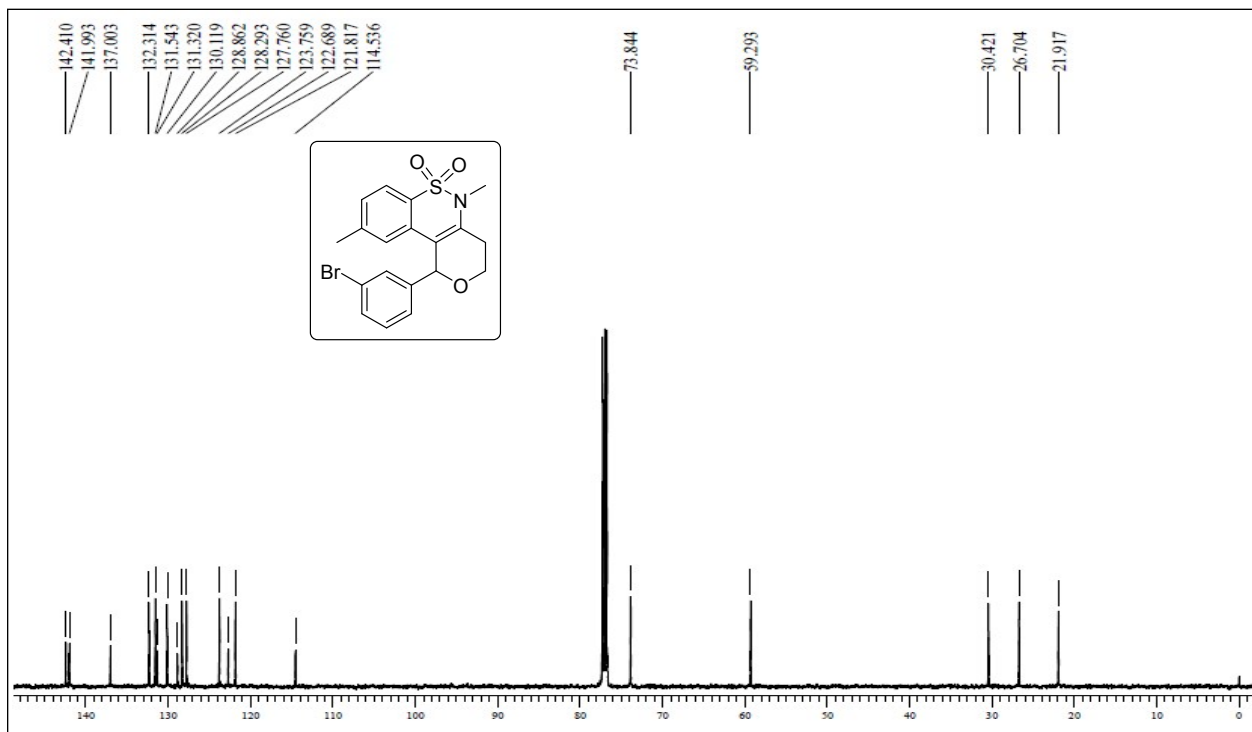

**<sup>13</sup>C NMR of Compound 4e**

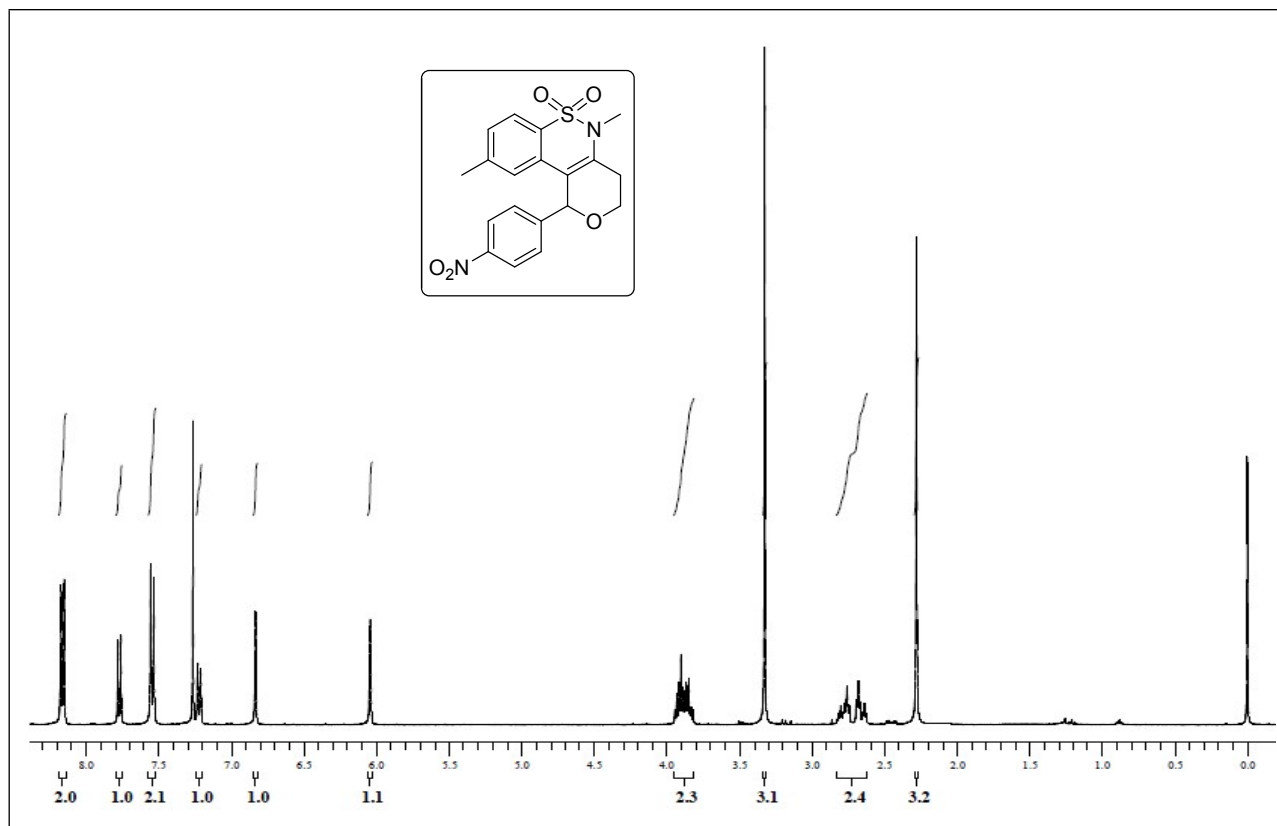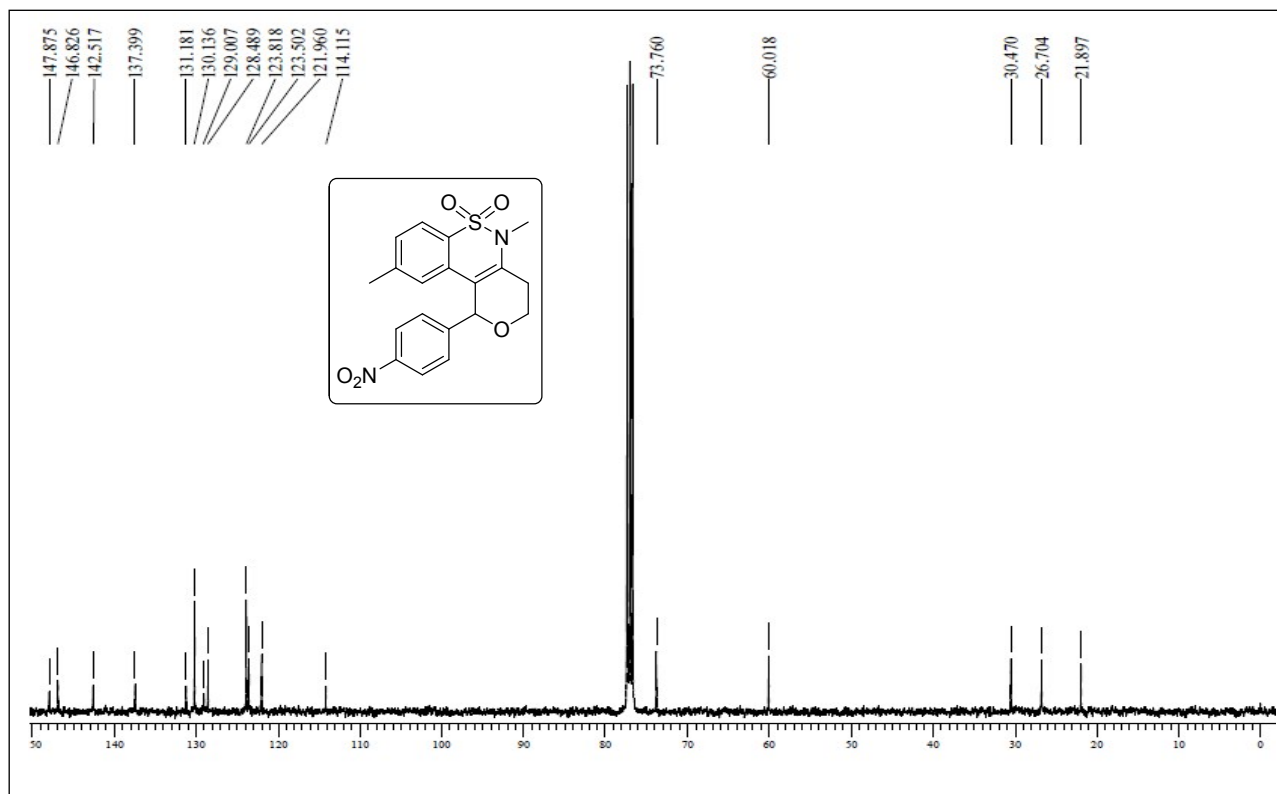





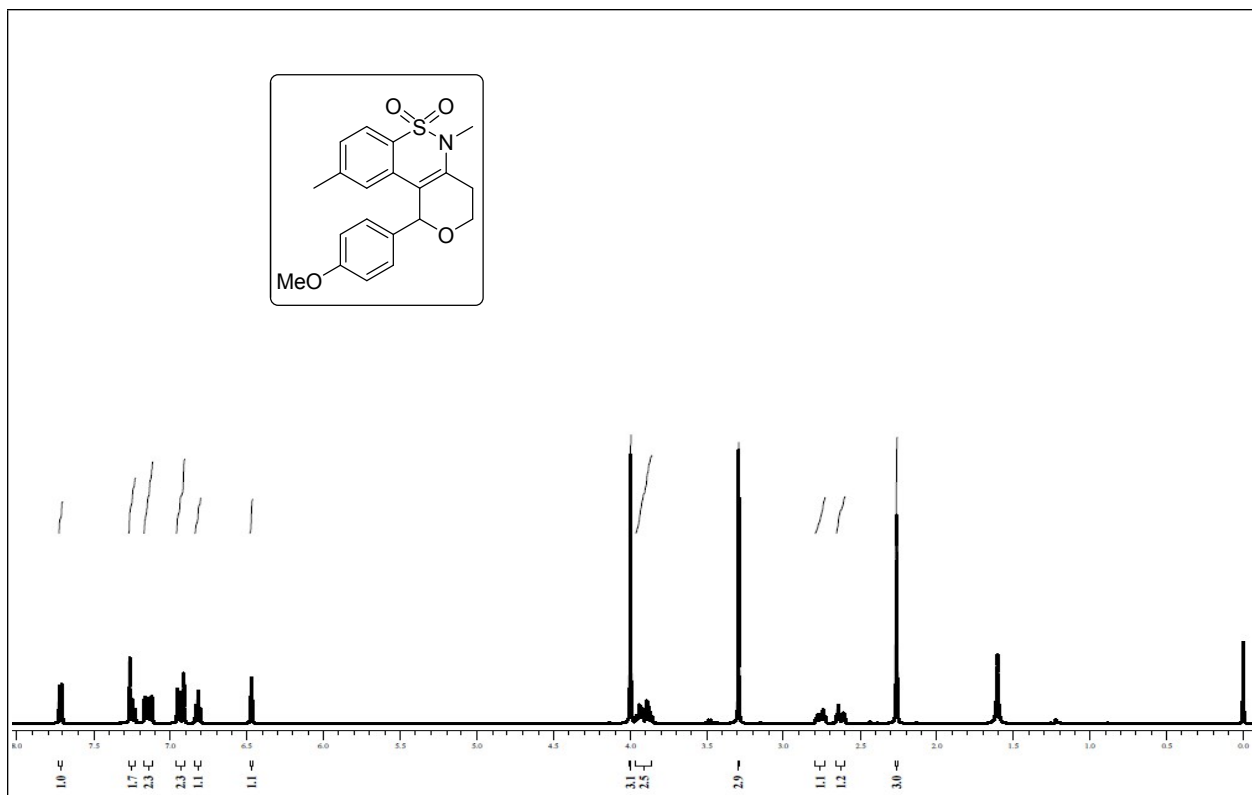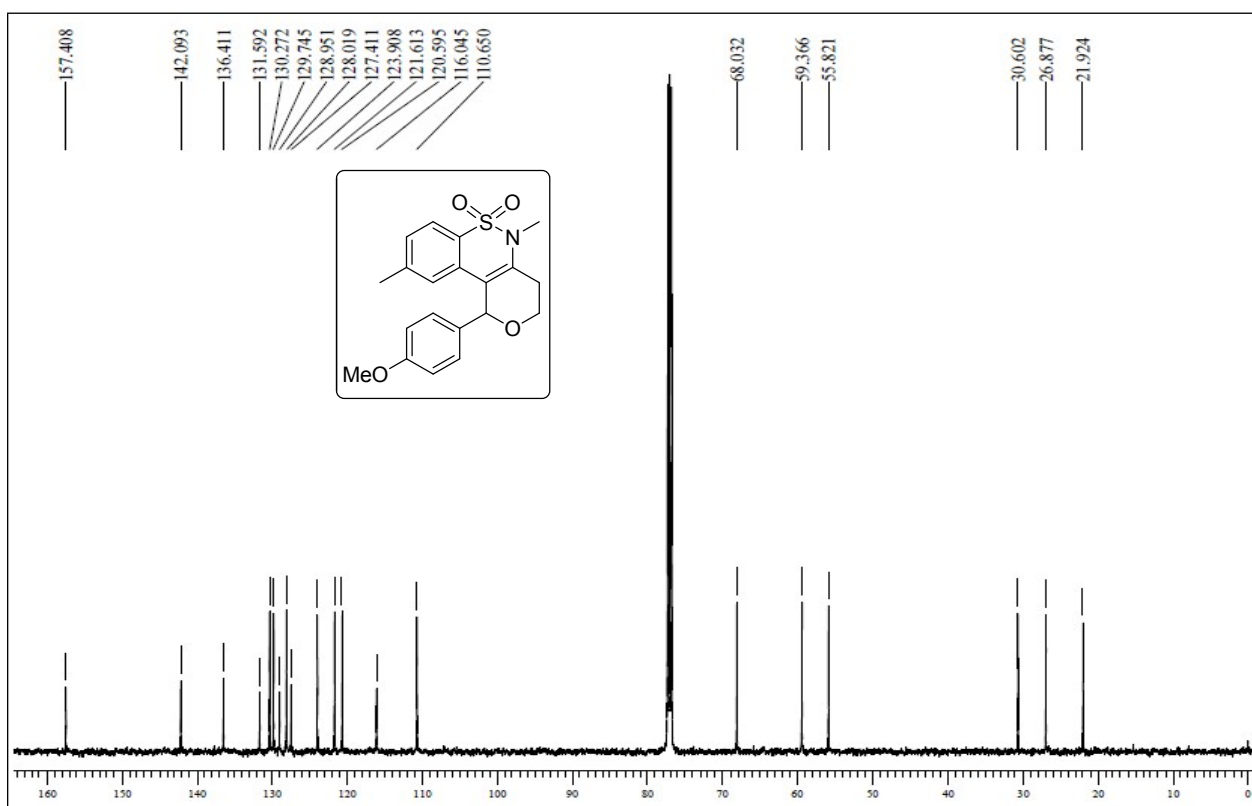

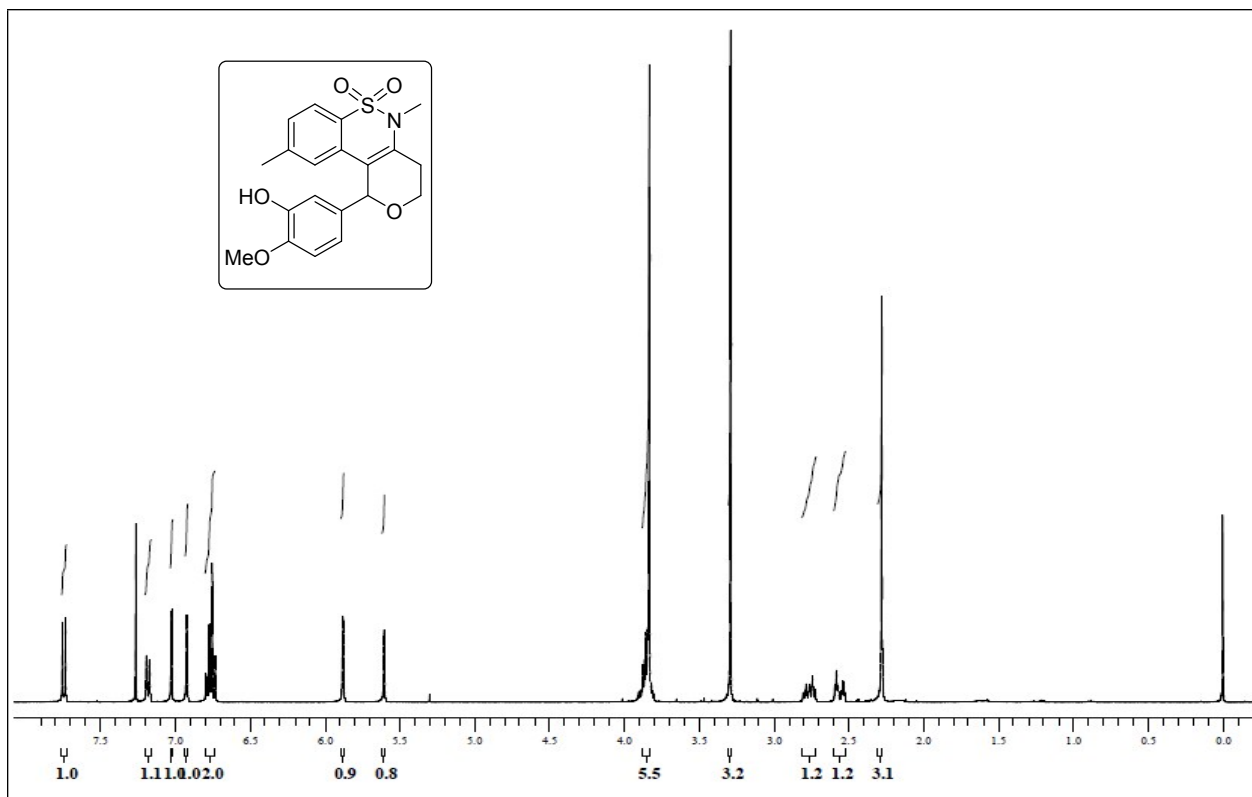

**<sup>1</sup>H NMR of Compound 4i**

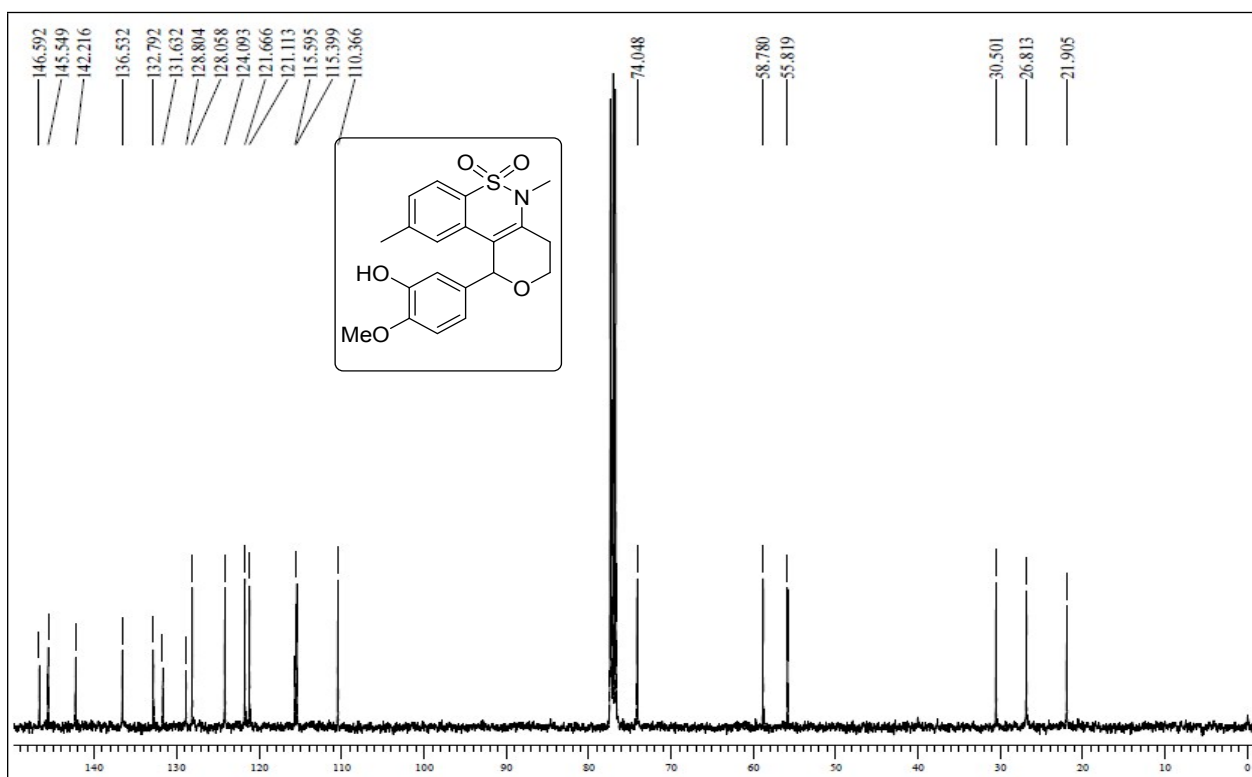

**<sup>13</sup>C NMR of Compound 4i**

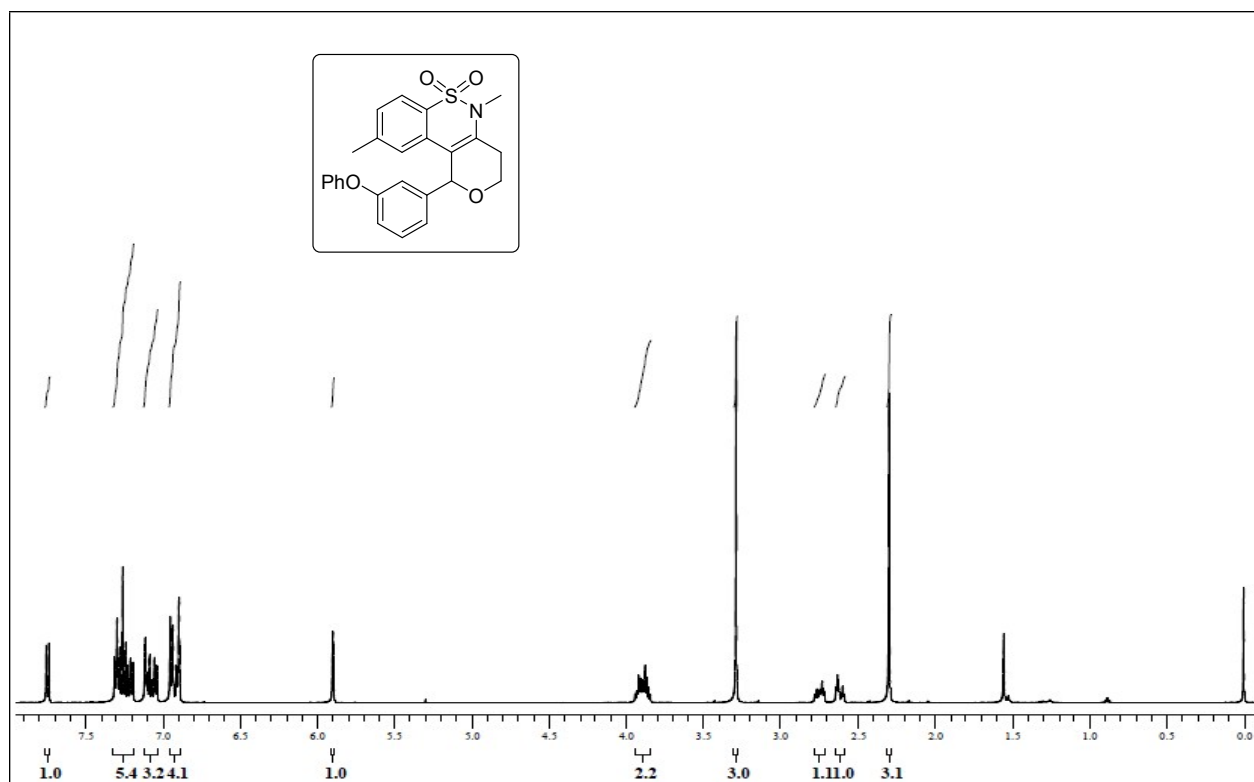

**<sup>1</sup>H NMR of Compound 4j**

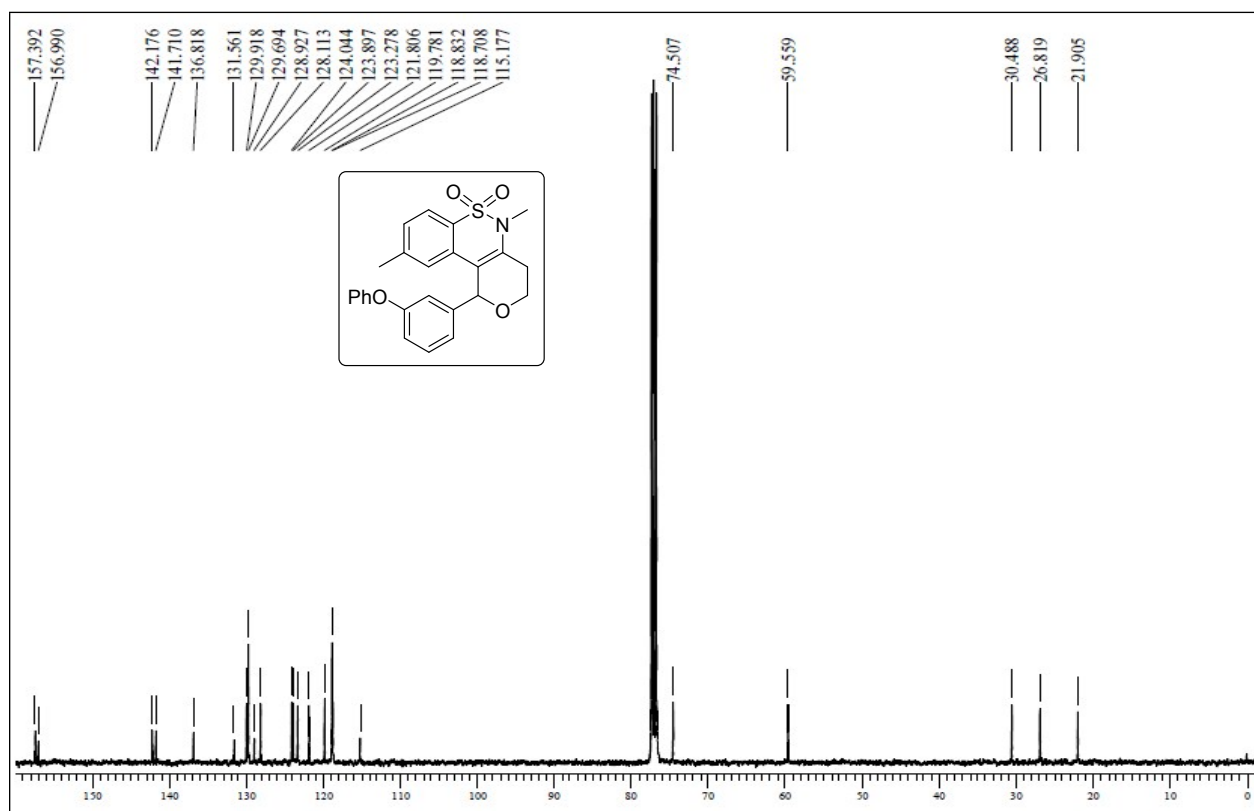

**<sup>13</sup>C NMR of Compound 4j**

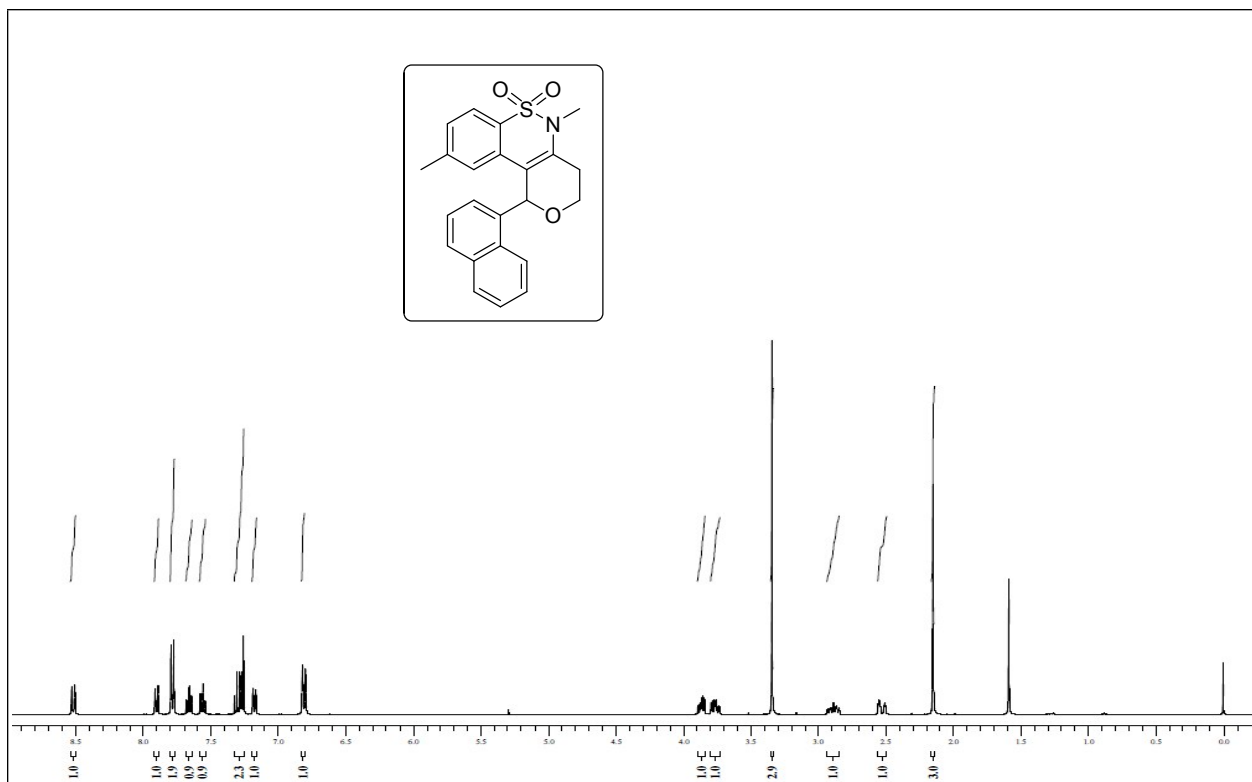

<sup>1</sup>H NMR of Compound 4k

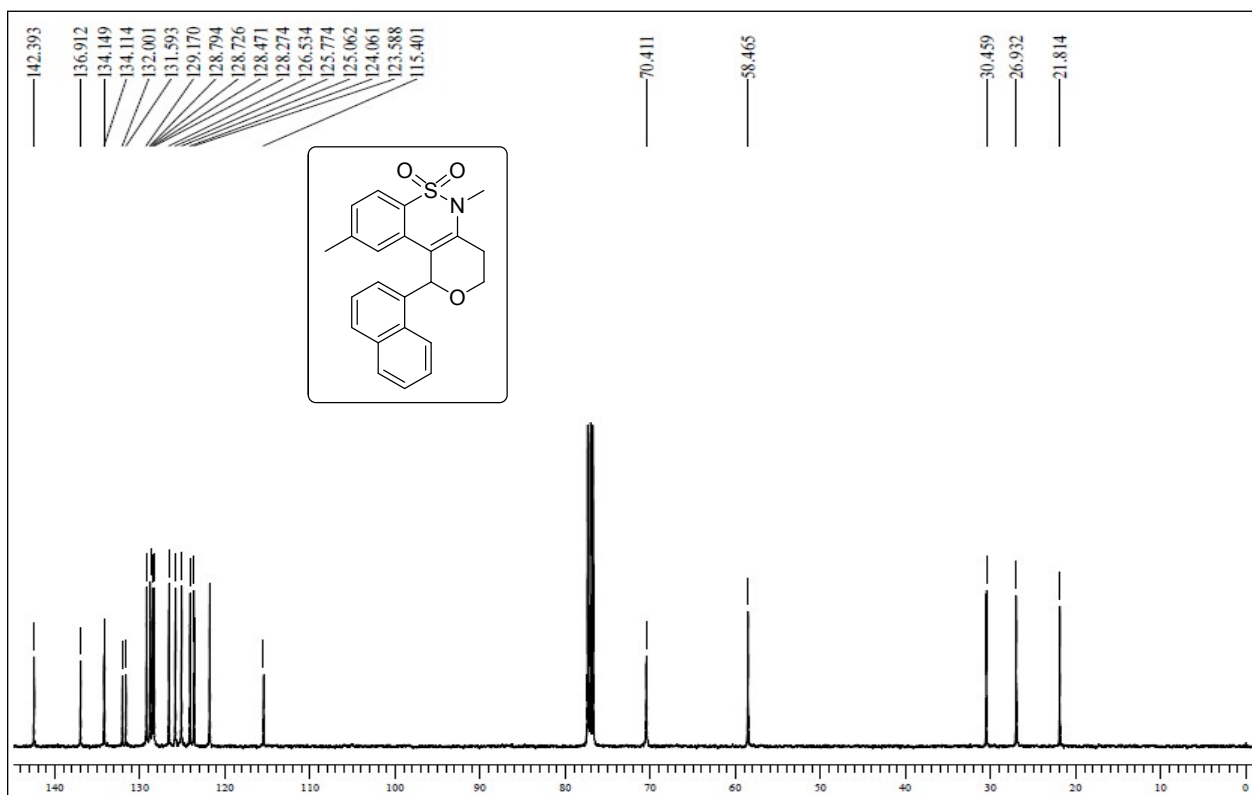

<sup>13</sup>C NMR of Compound 4k

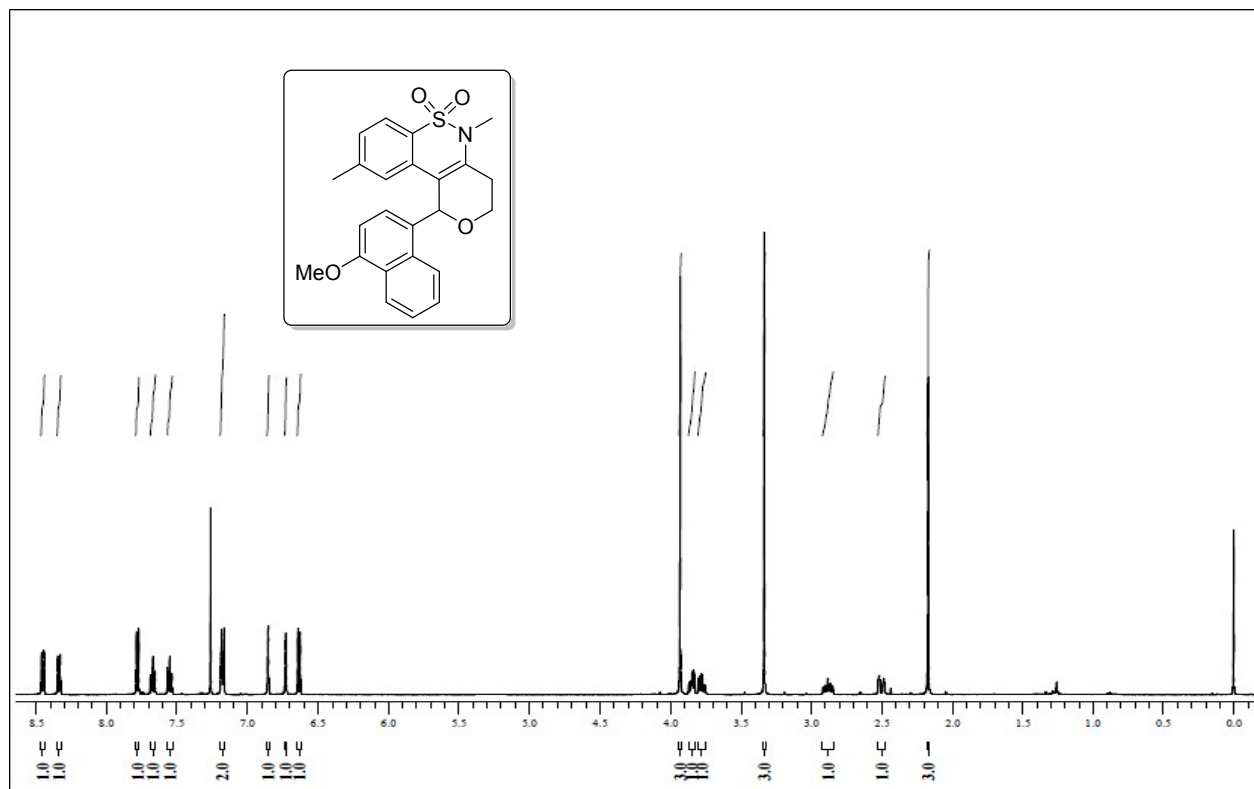

**<sup>1</sup>H NMR of Compound 4l**

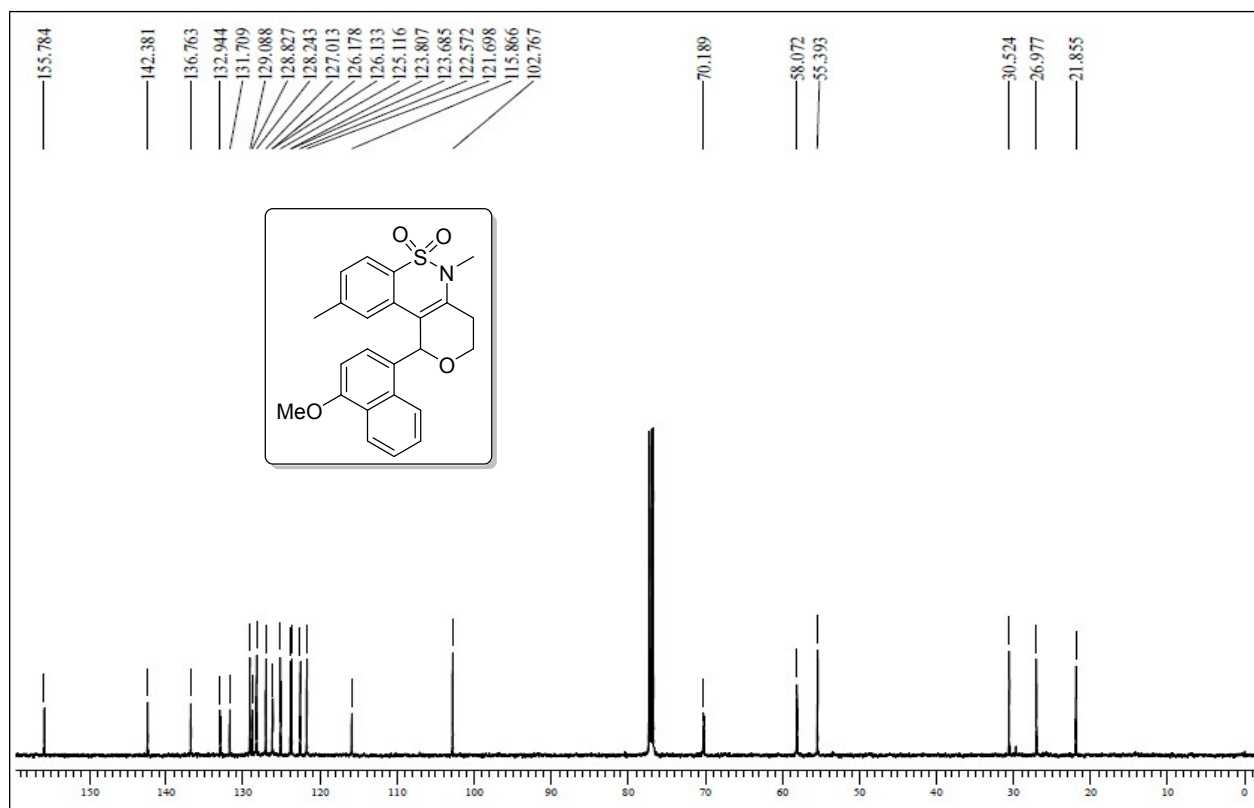

**<sup>13</sup>C NMR of Compound 4l**

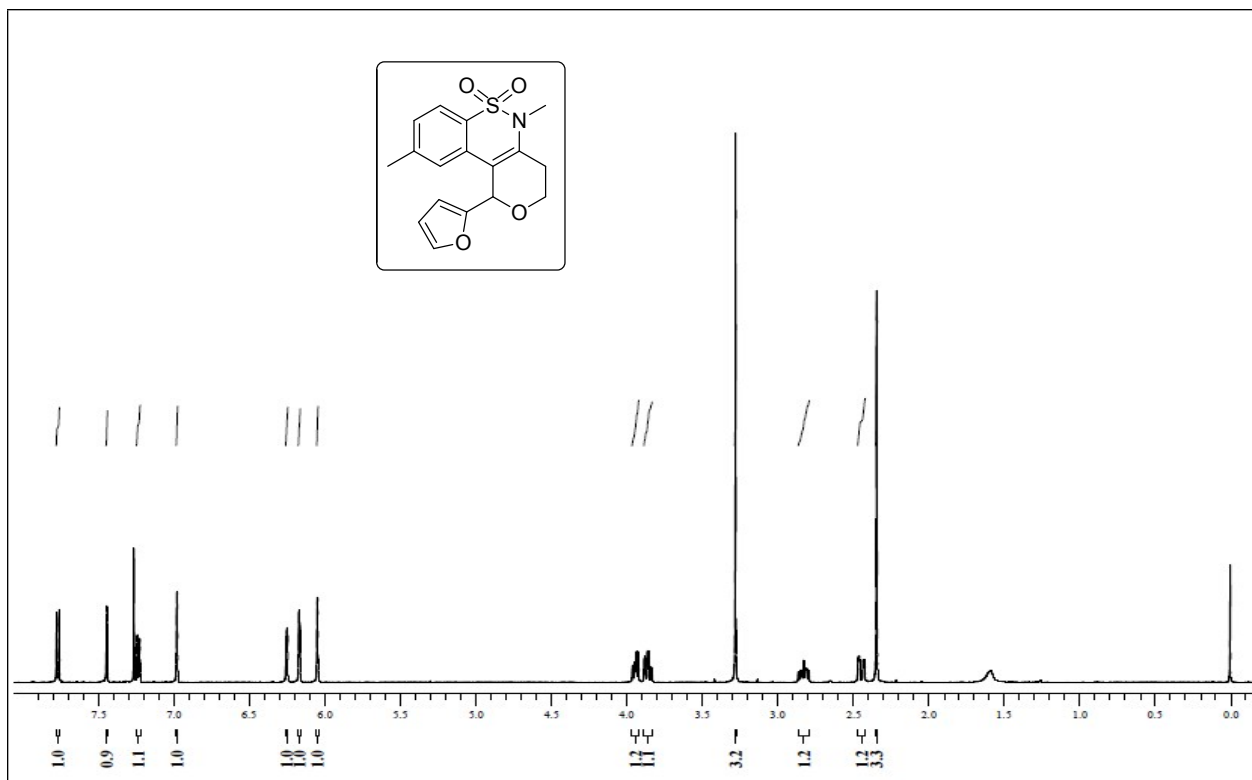

<sup>1</sup>H NMR of Compound 4m

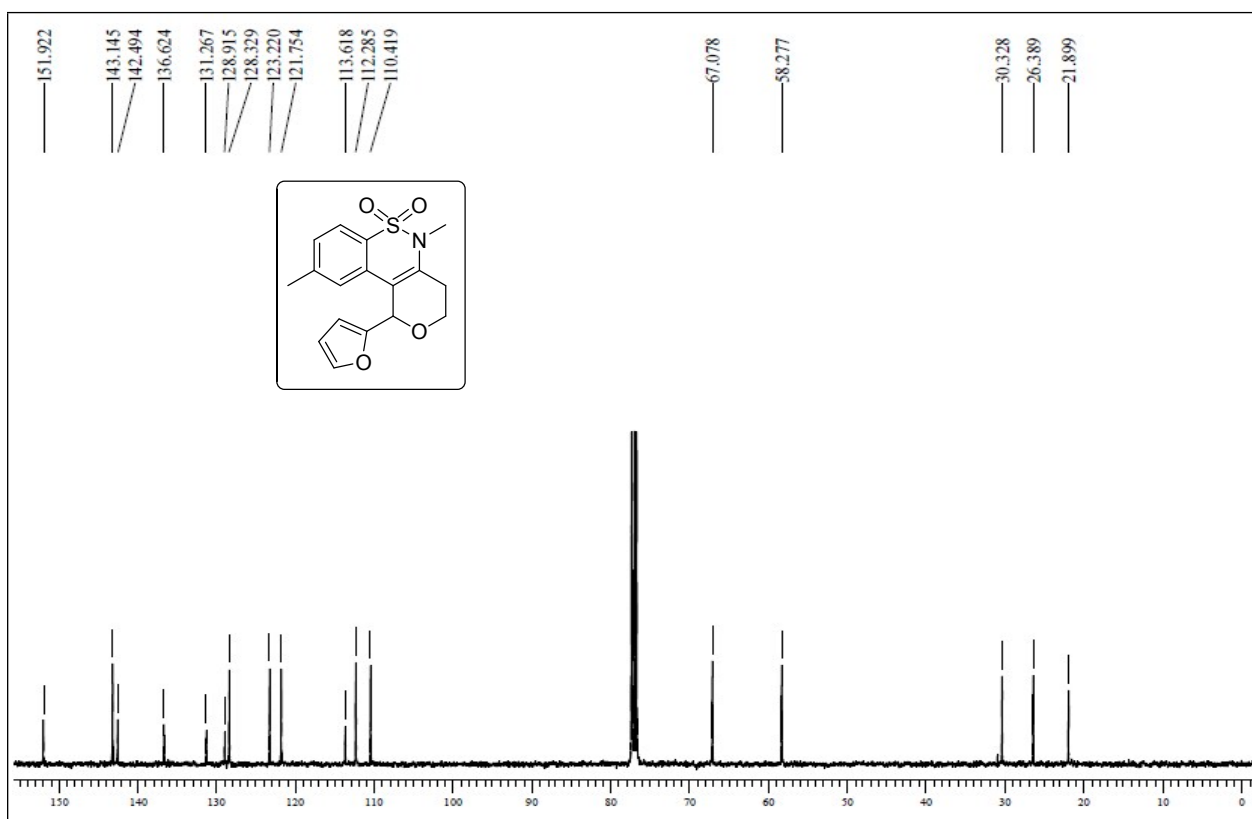

<sup>13</sup>C NMR of Compound 4m

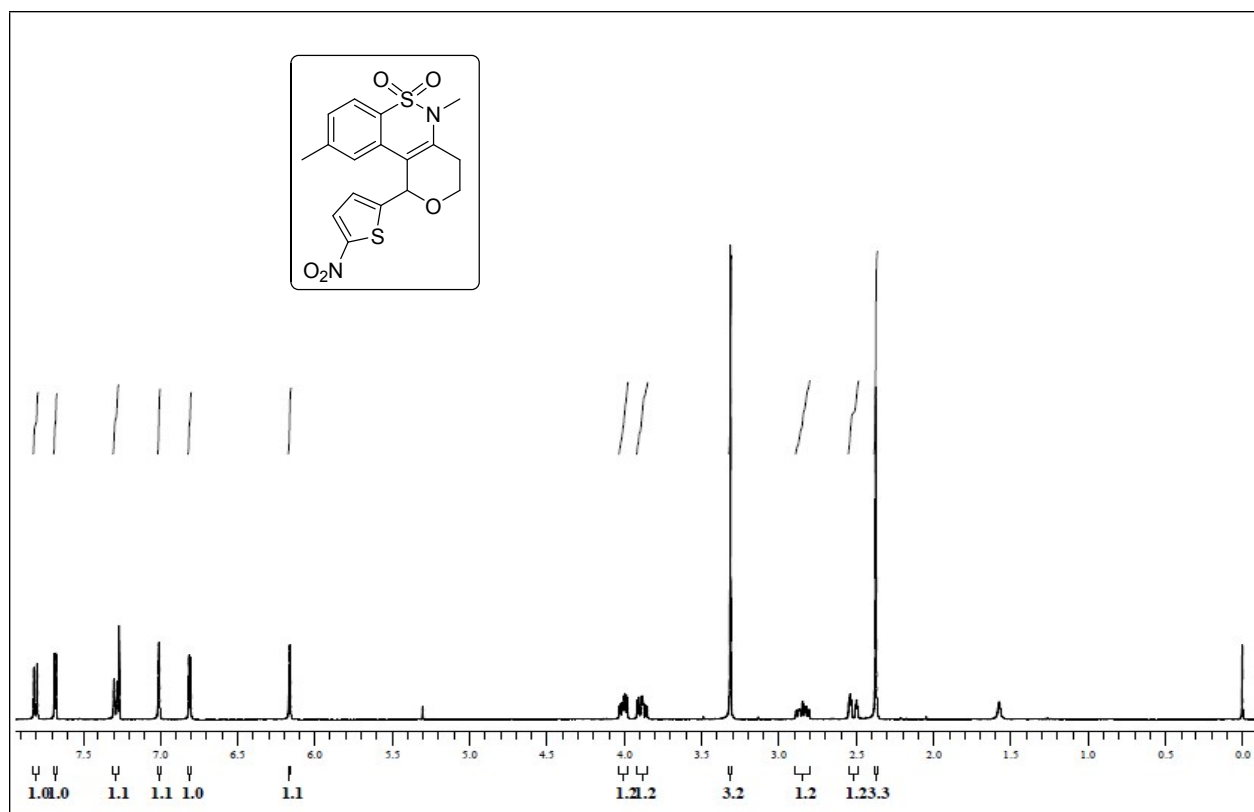

**<sup>1</sup>H NMR of Compound 4n**

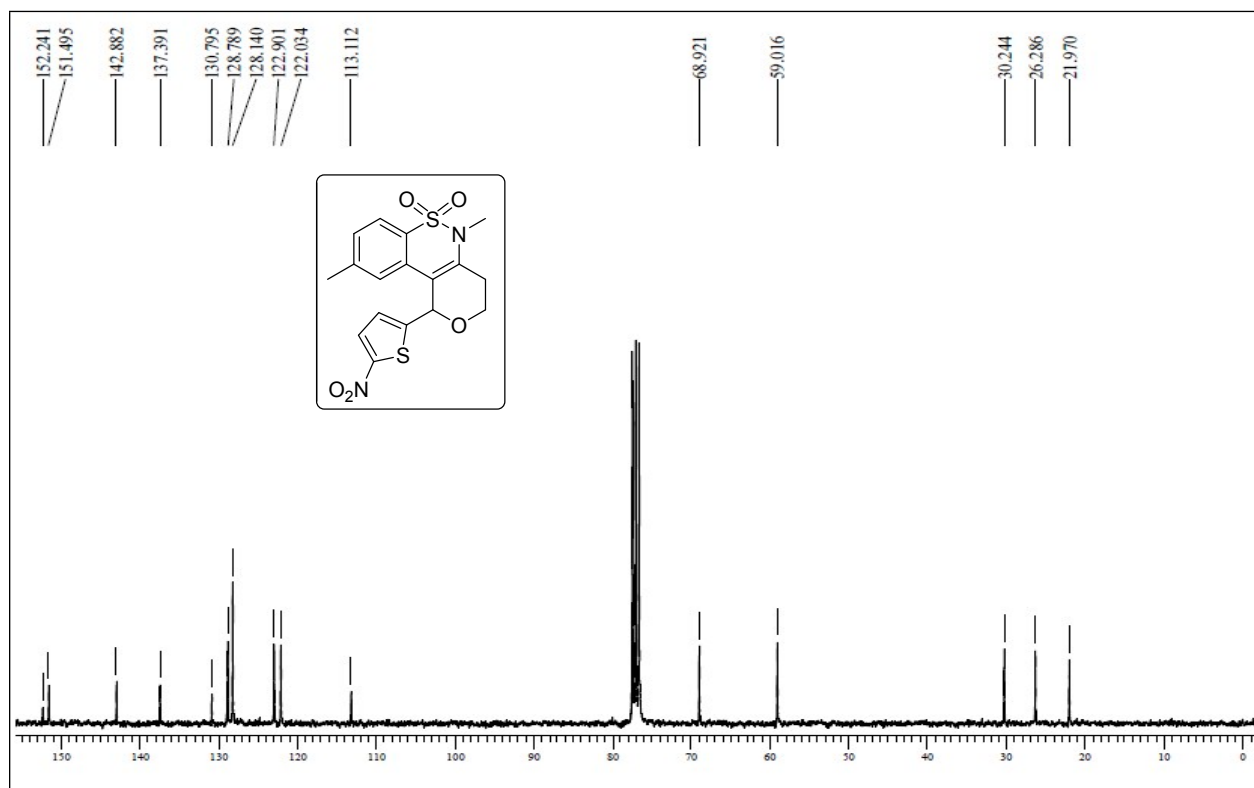

**<sup>13</sup>C NMR of Compound 4n**



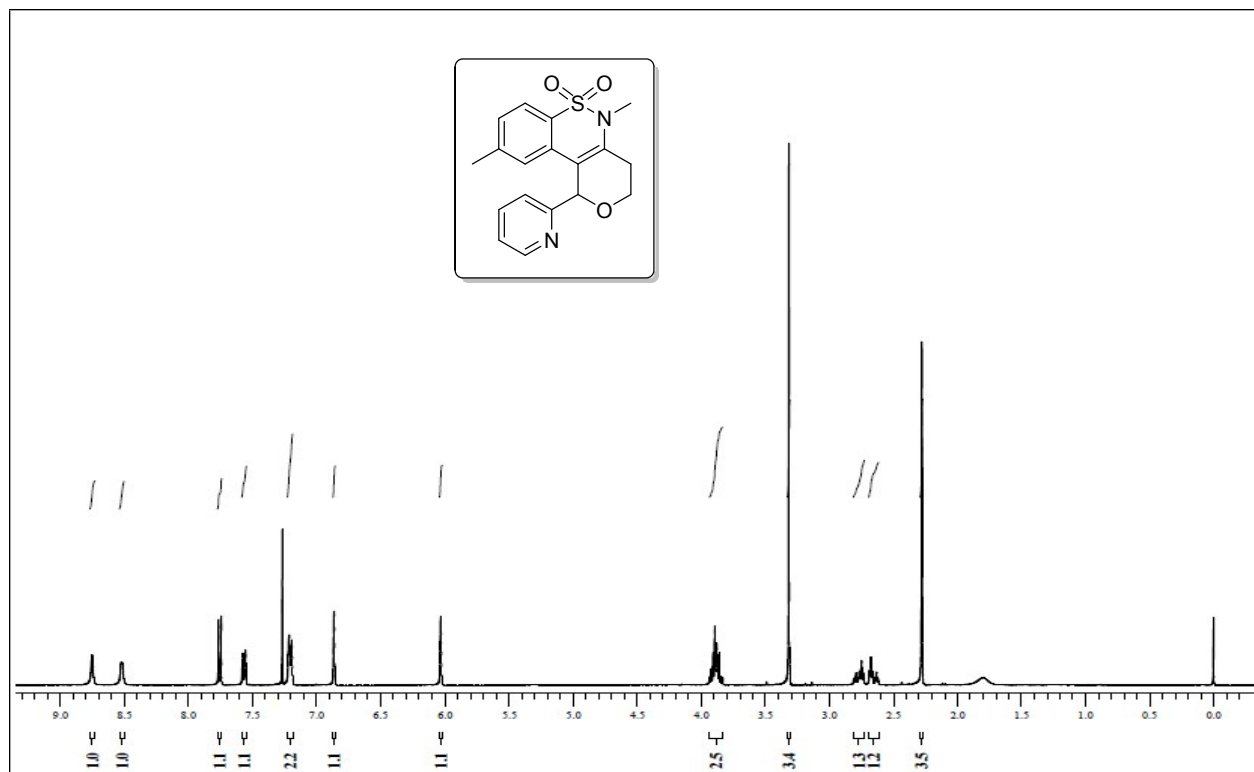

<sup>1</sup>H NMR of Compound 40

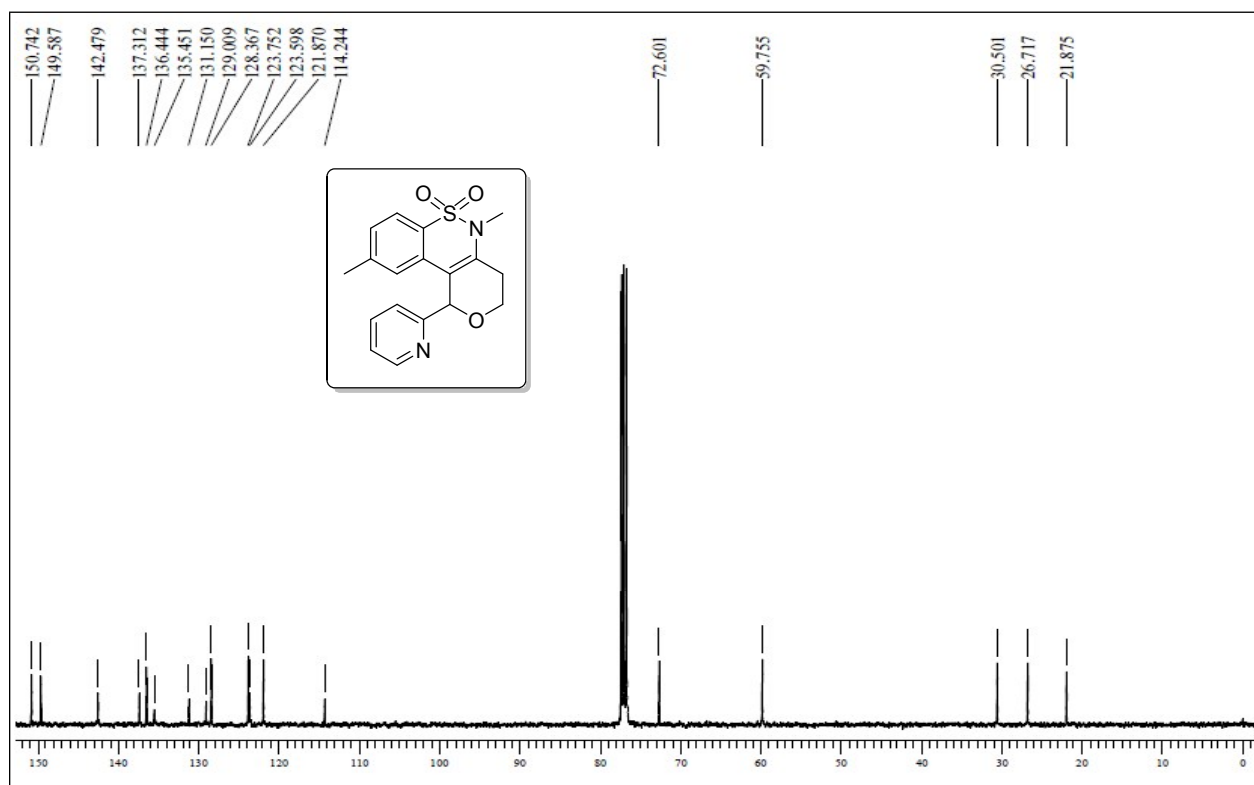

<sup>13</sup>C NMR of Compound 40

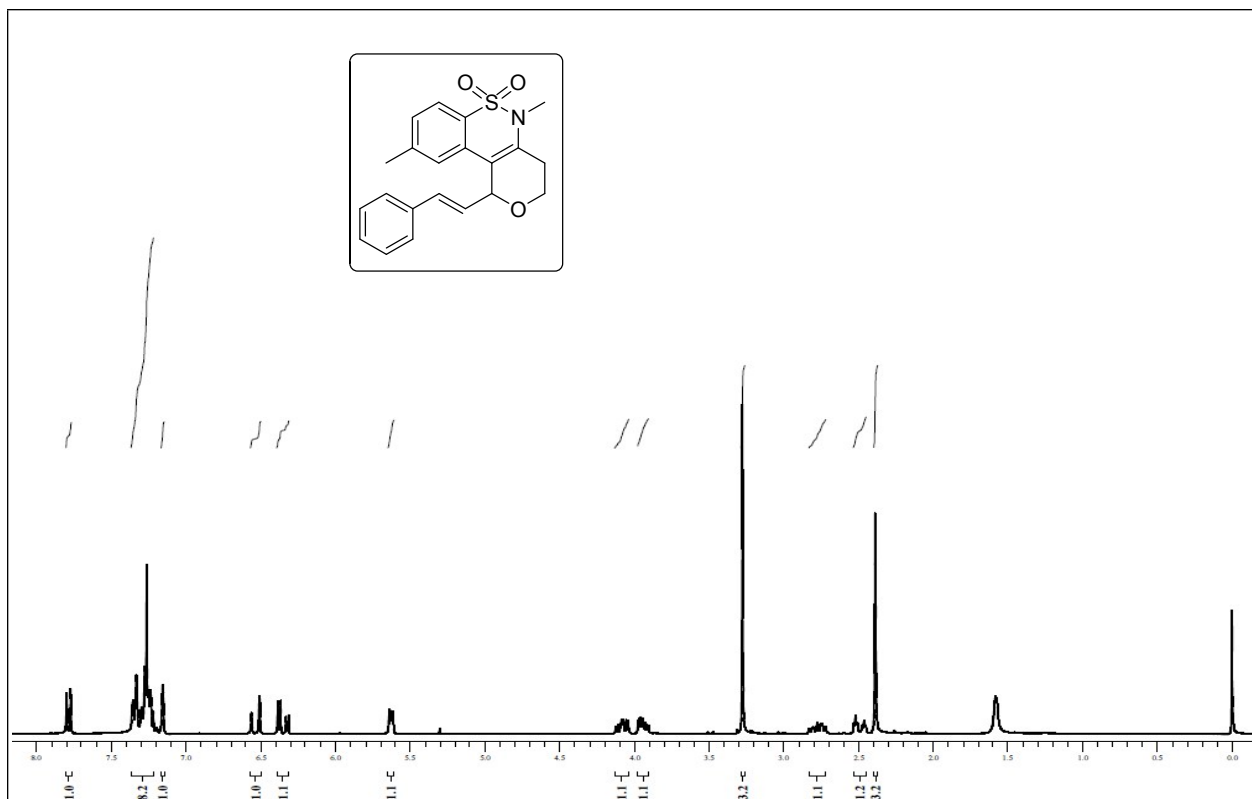

<sup>1</sup>H NMR of Compound 4p

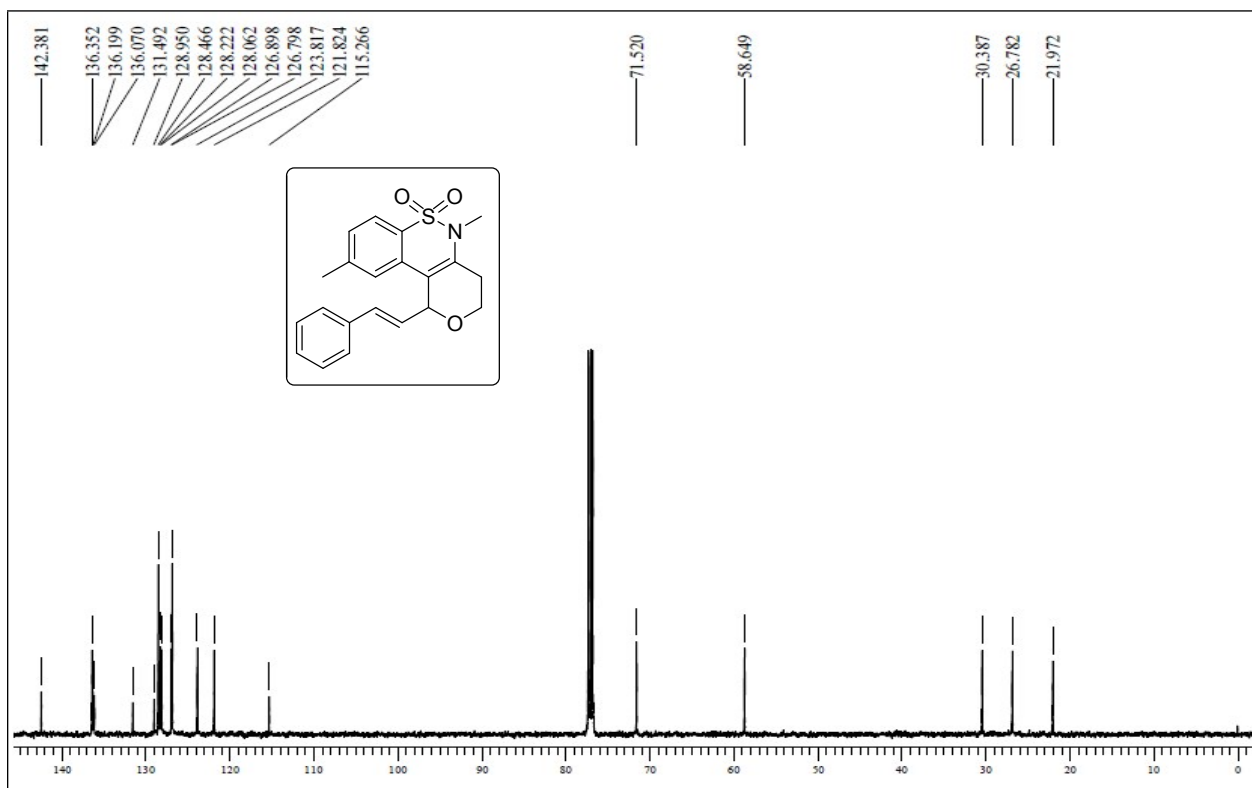

<sup>13</sup>C NMR of Compound 4p

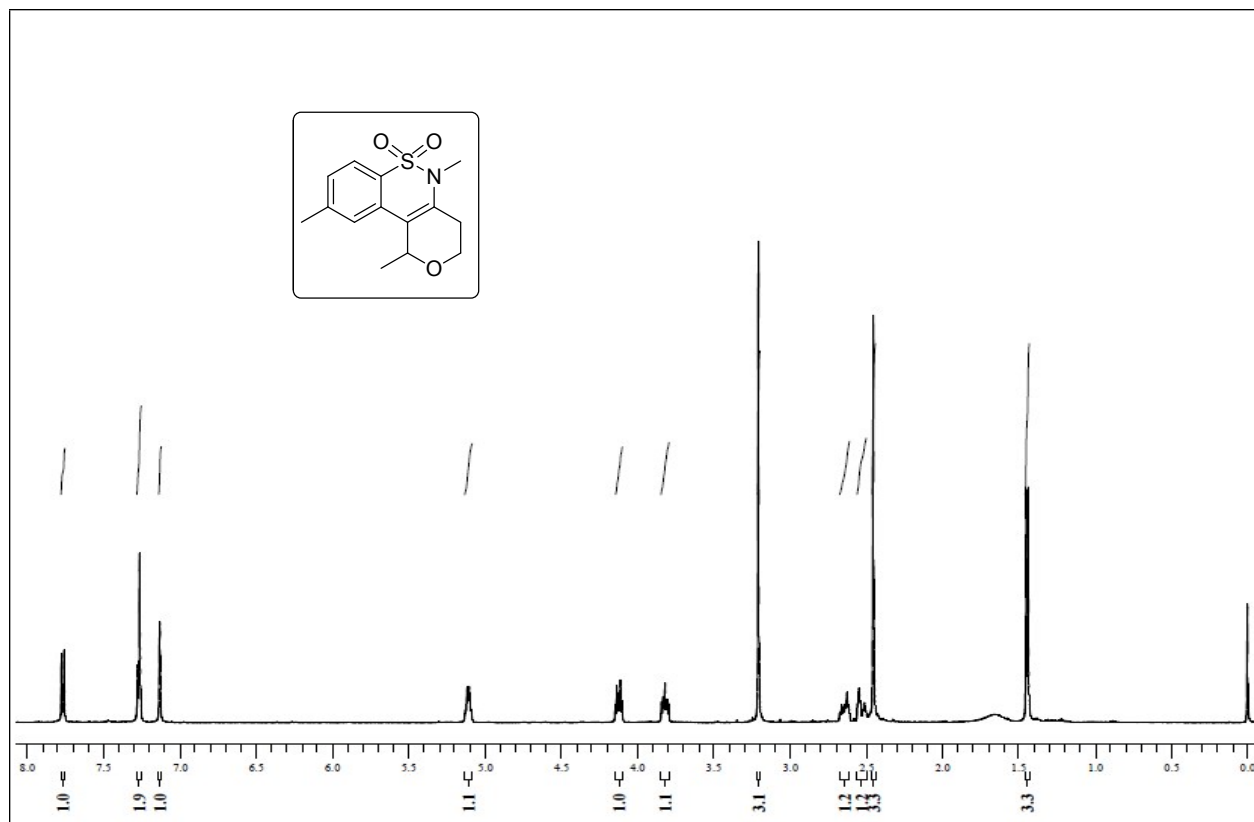

**<sup>1</sup>H NMR of Compound 4q**

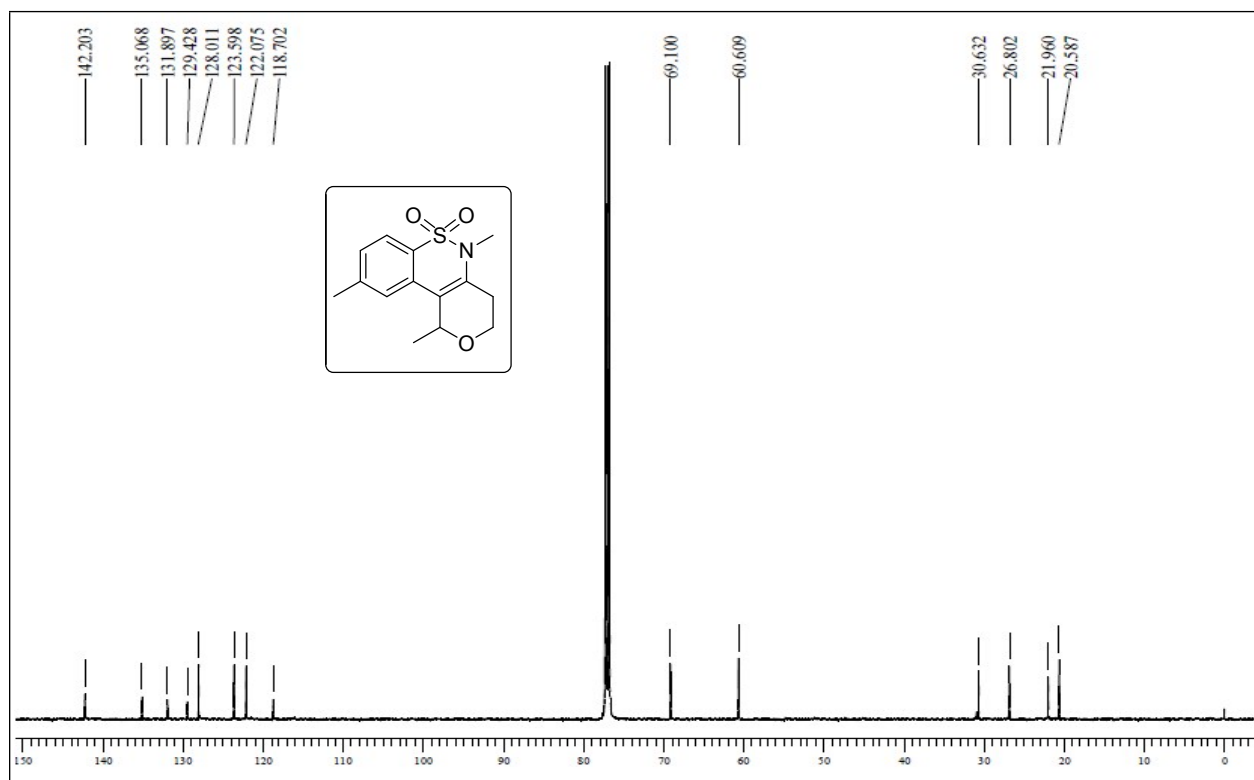

**<sup>13</sup>C NMR of Compound 4q**

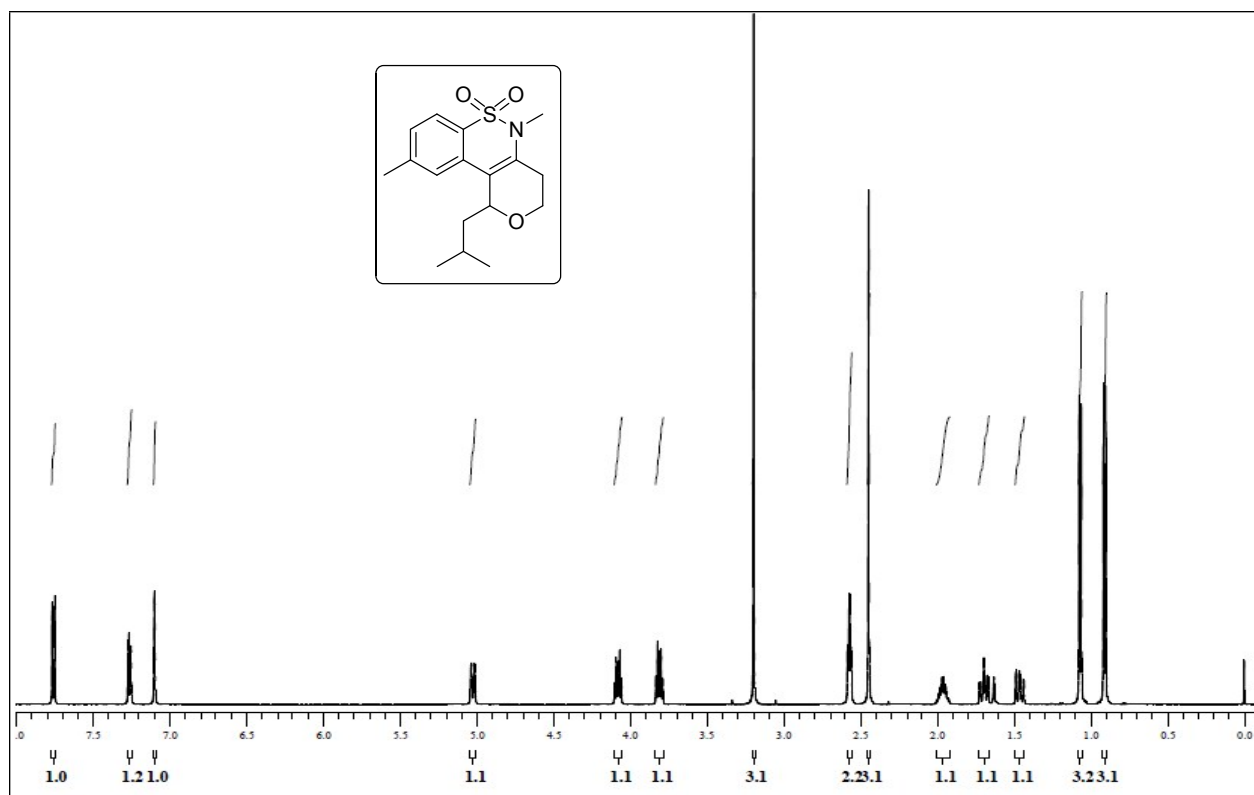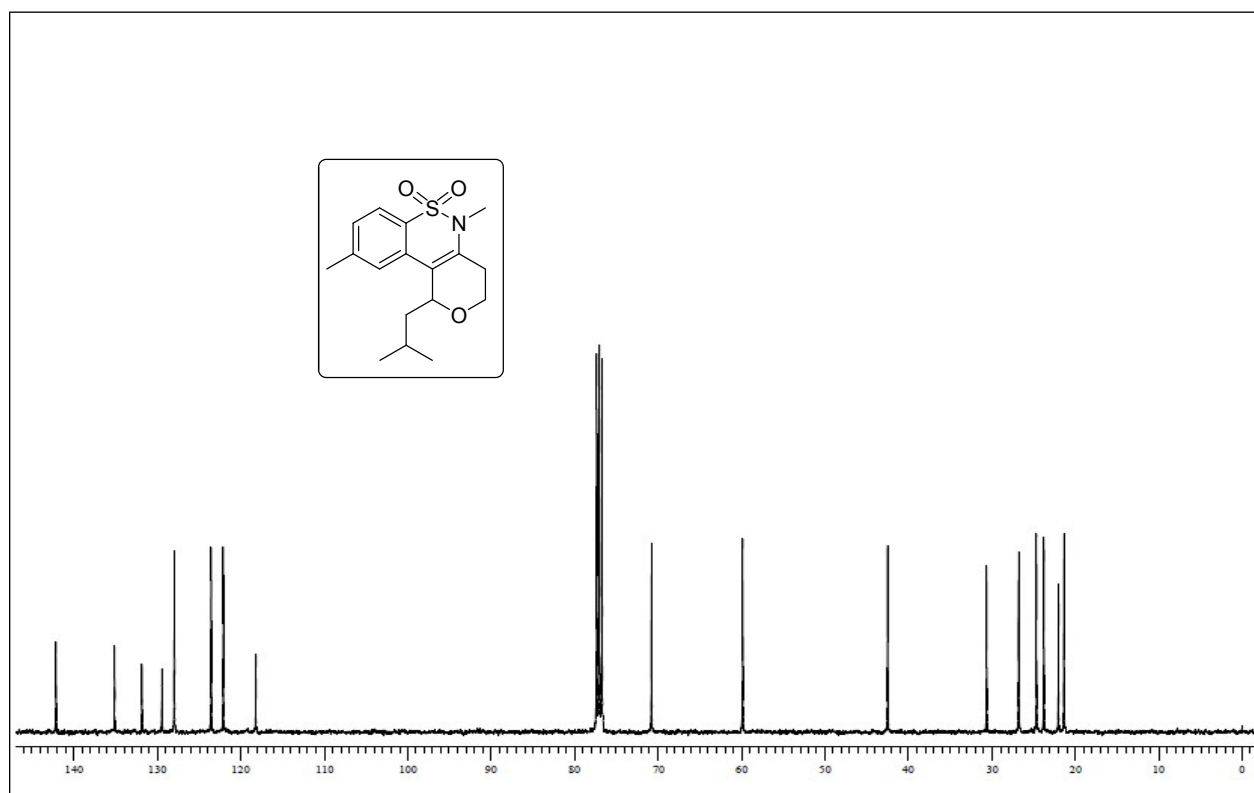

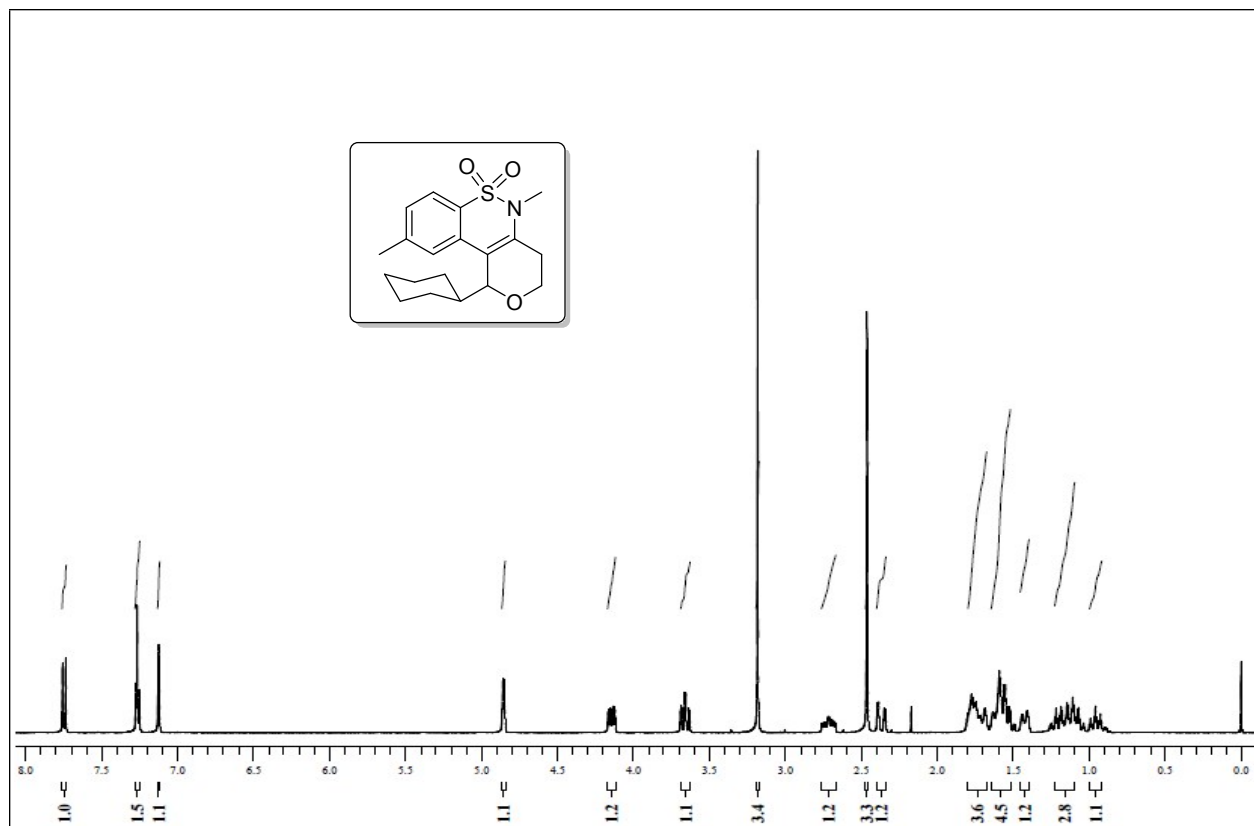

**<sup>1</sup>H NMR of Compound 4s**

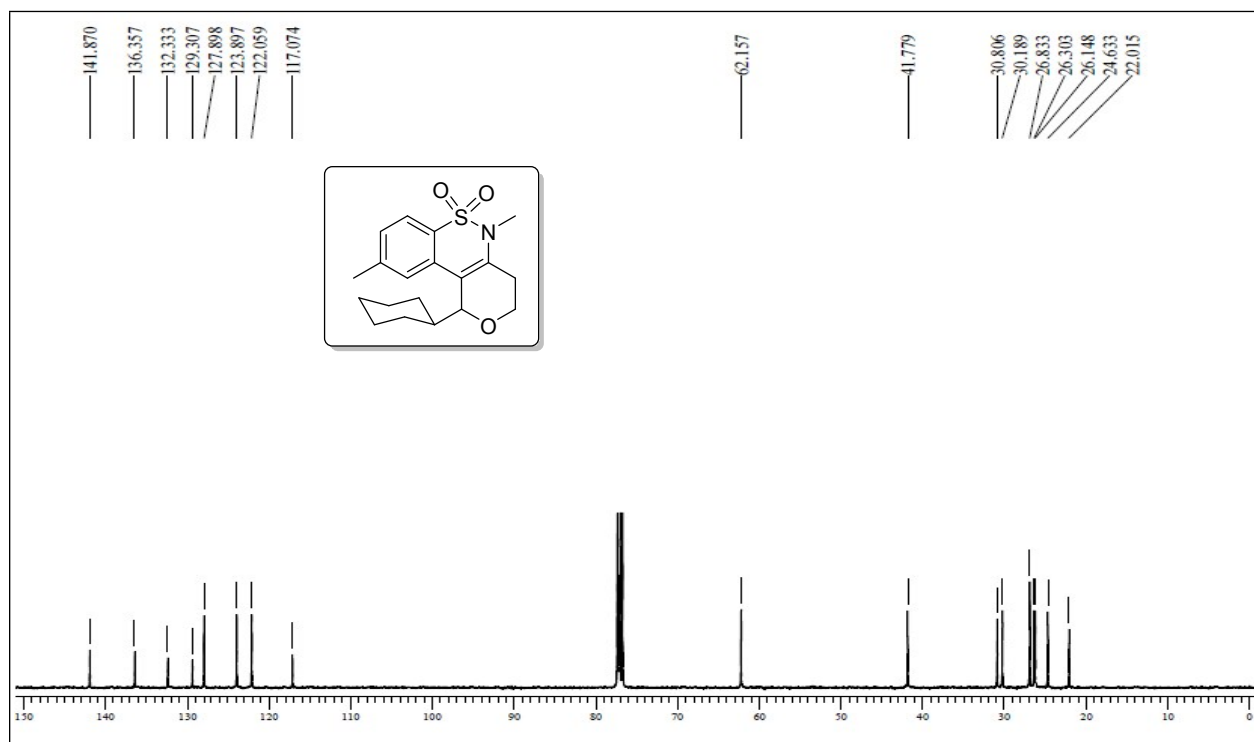

**<sup>13</sup>C NMR of Compound 4s**

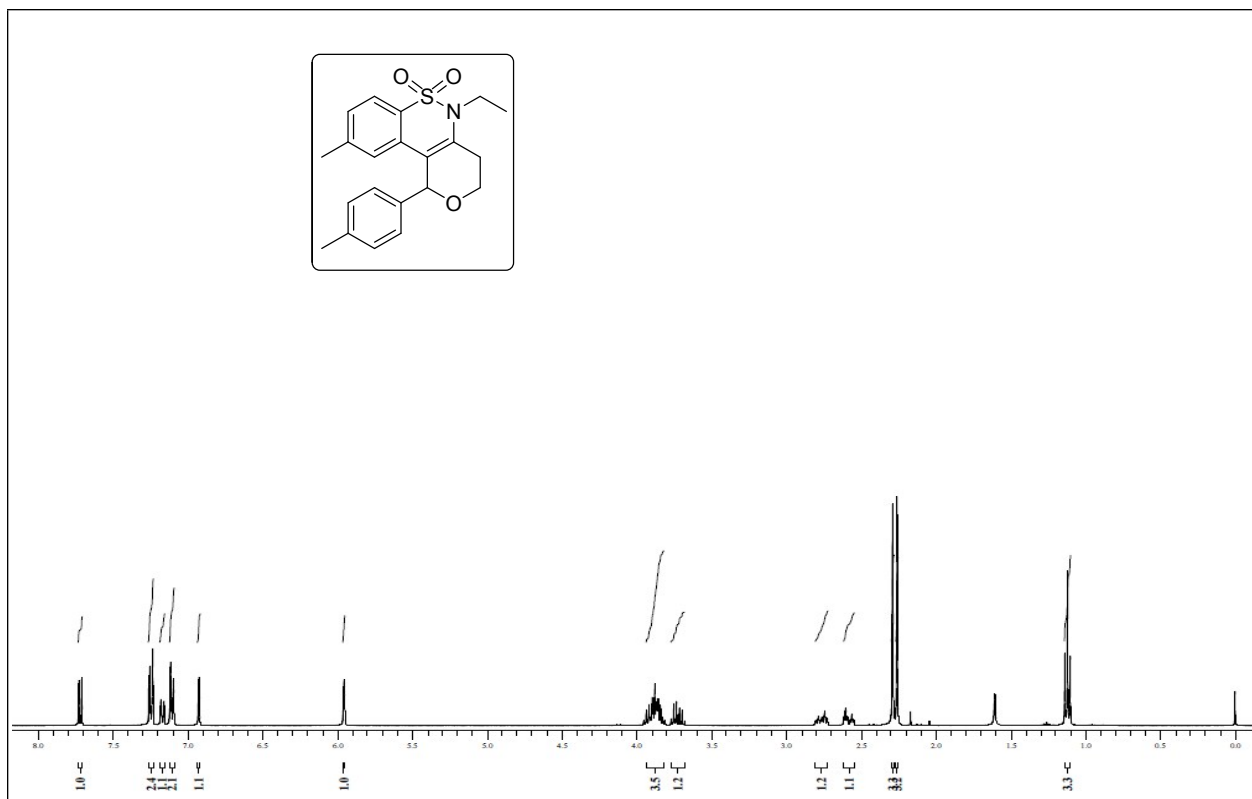

**<sup>1</sup>H NMR of Compound 4t**

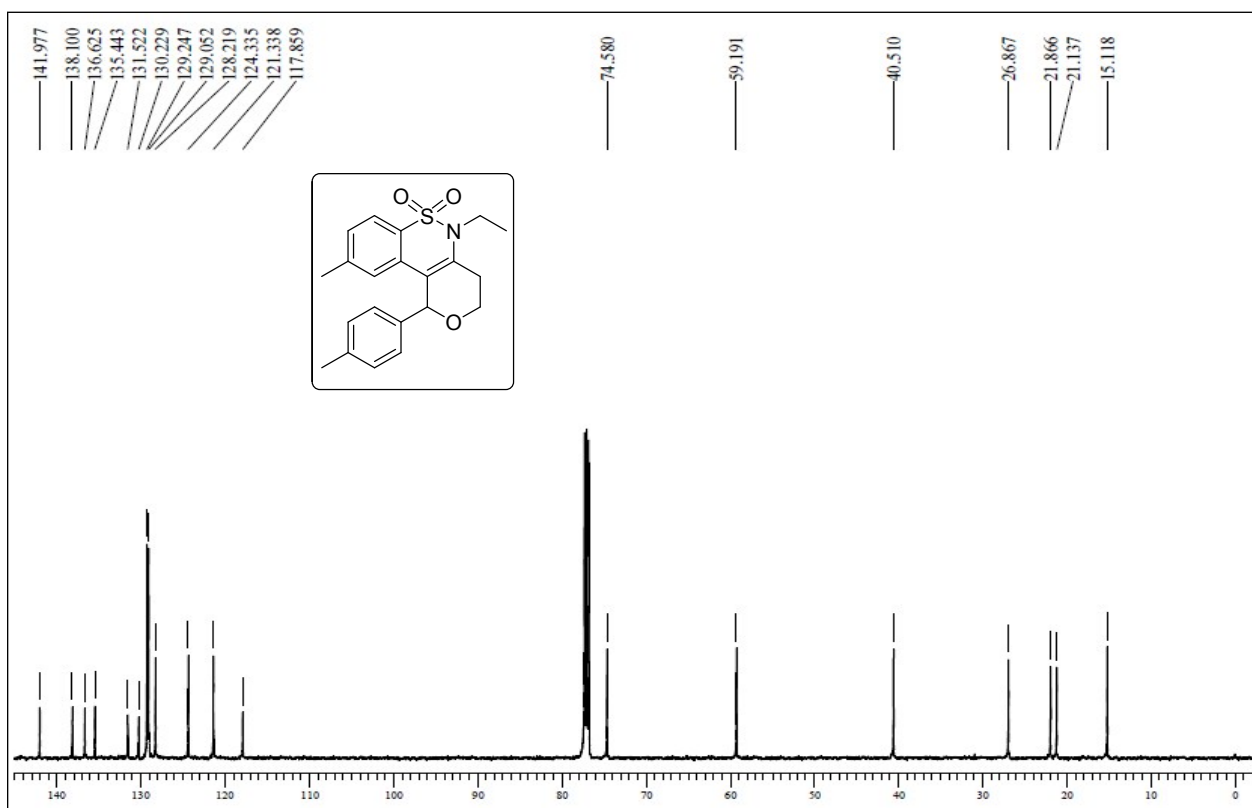

**<sup>13</sup>C NMR of Compound 4t**

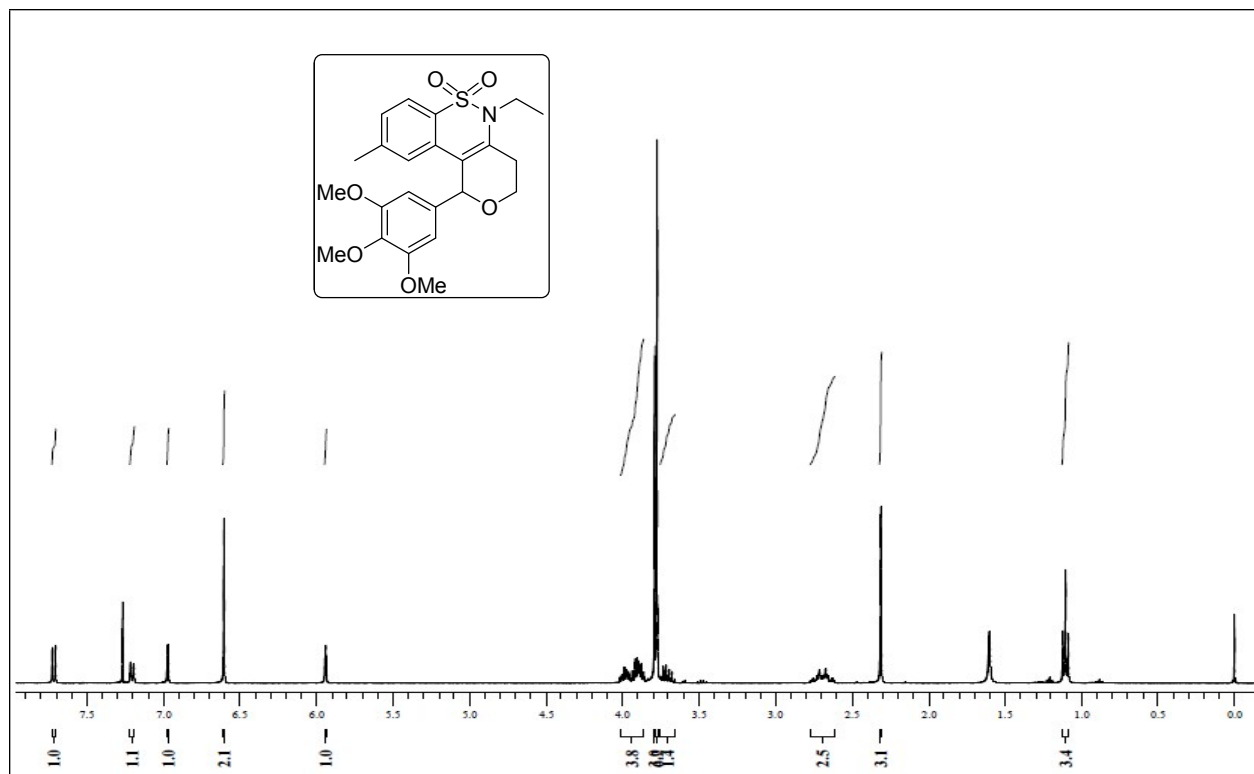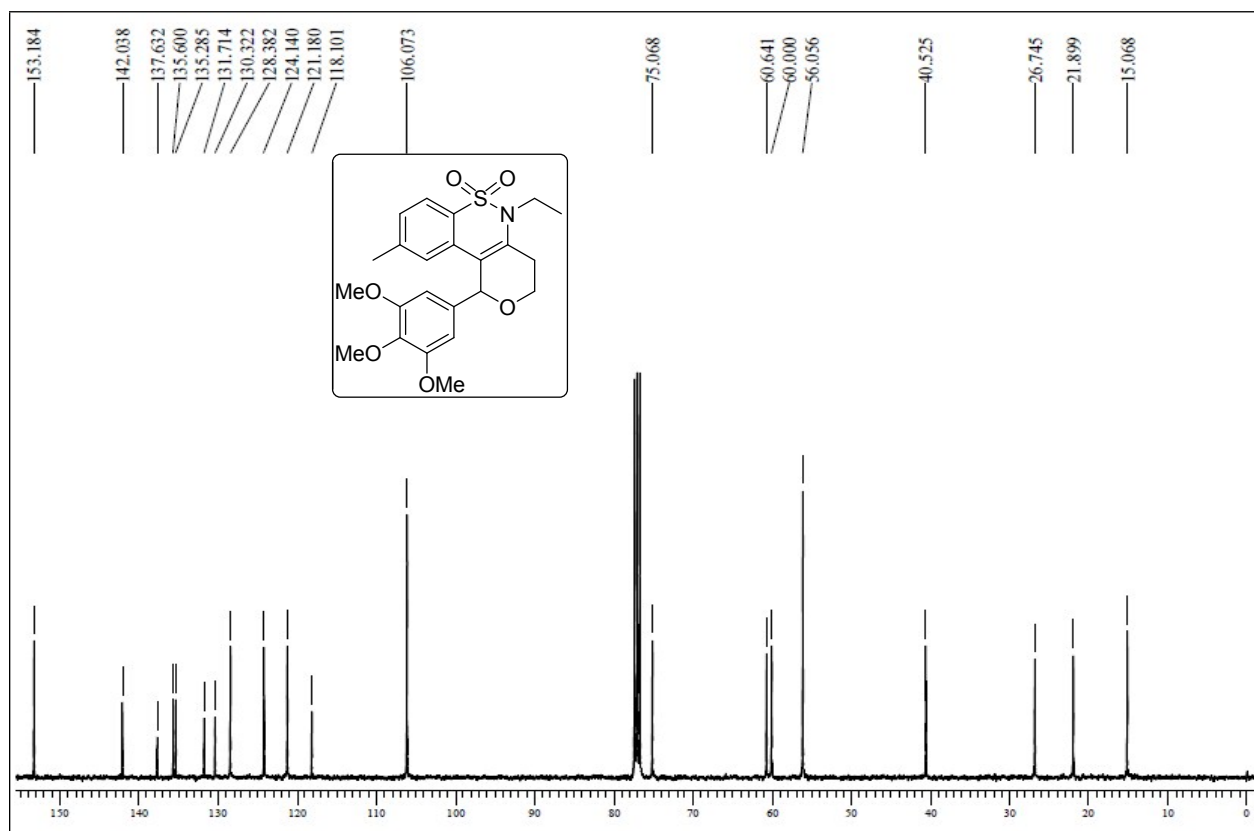

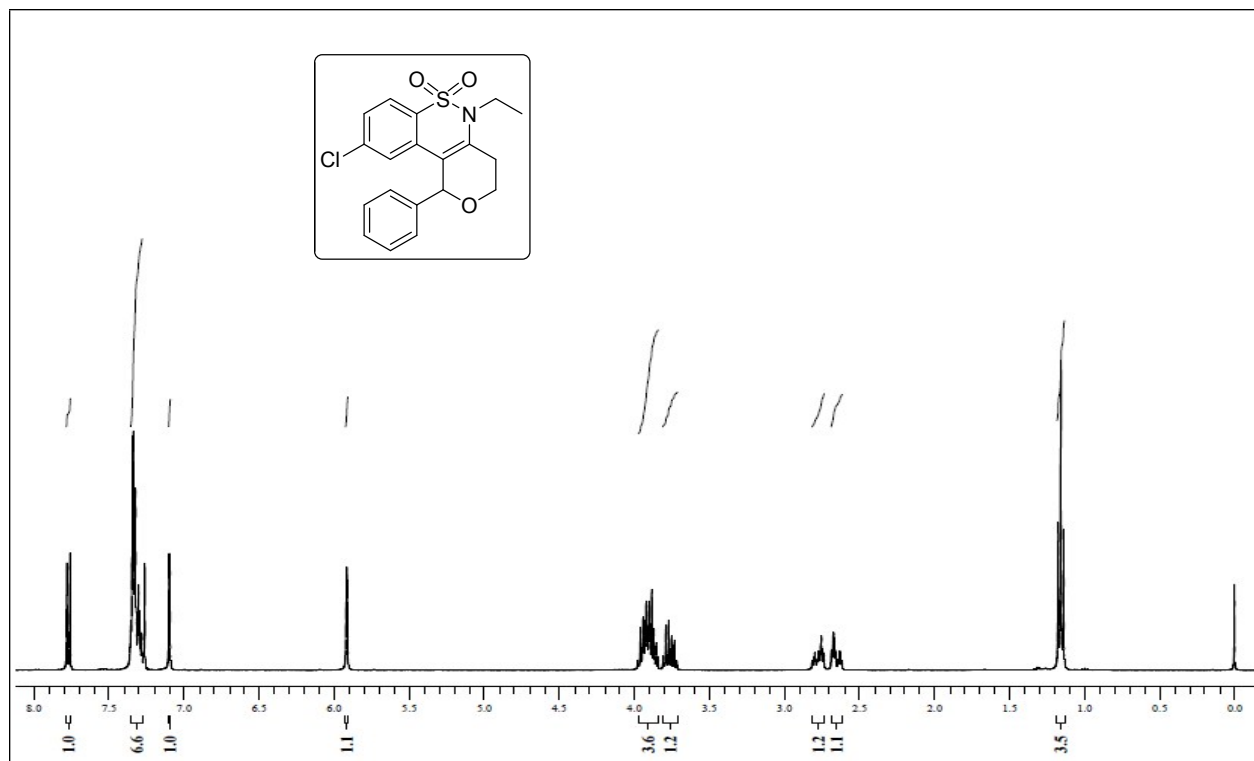

**<sup>1</sup>H NMR of Compound 4v**

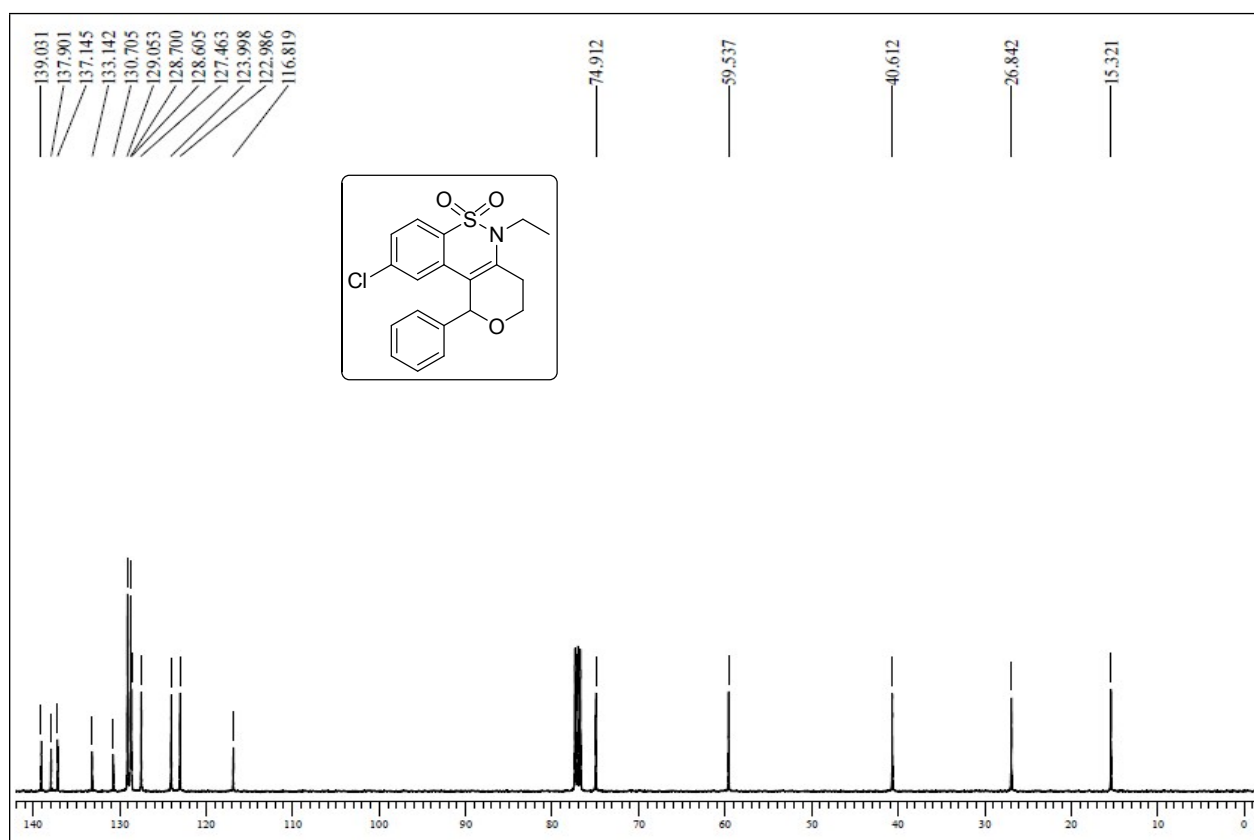

**<sup>13</sup>C NMR of Compound 4v**



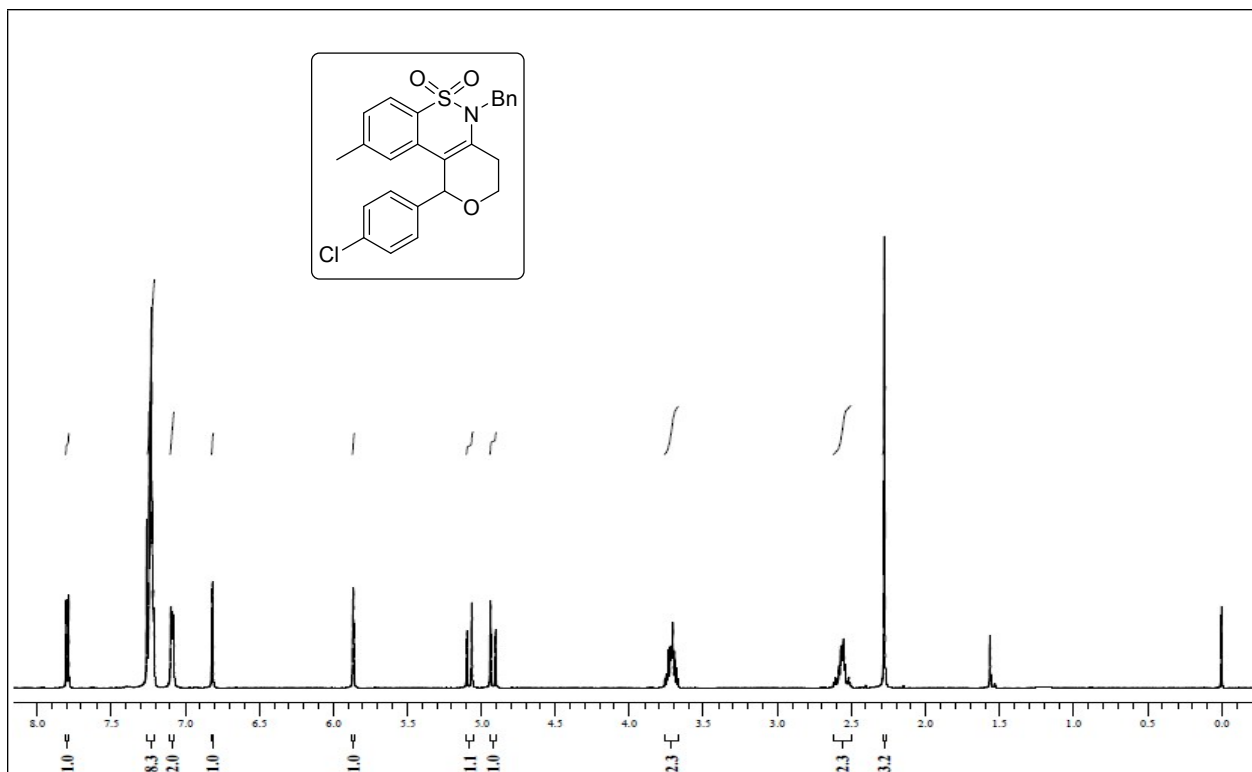

**<sup>1</sup>H NMR of Compound 4w**

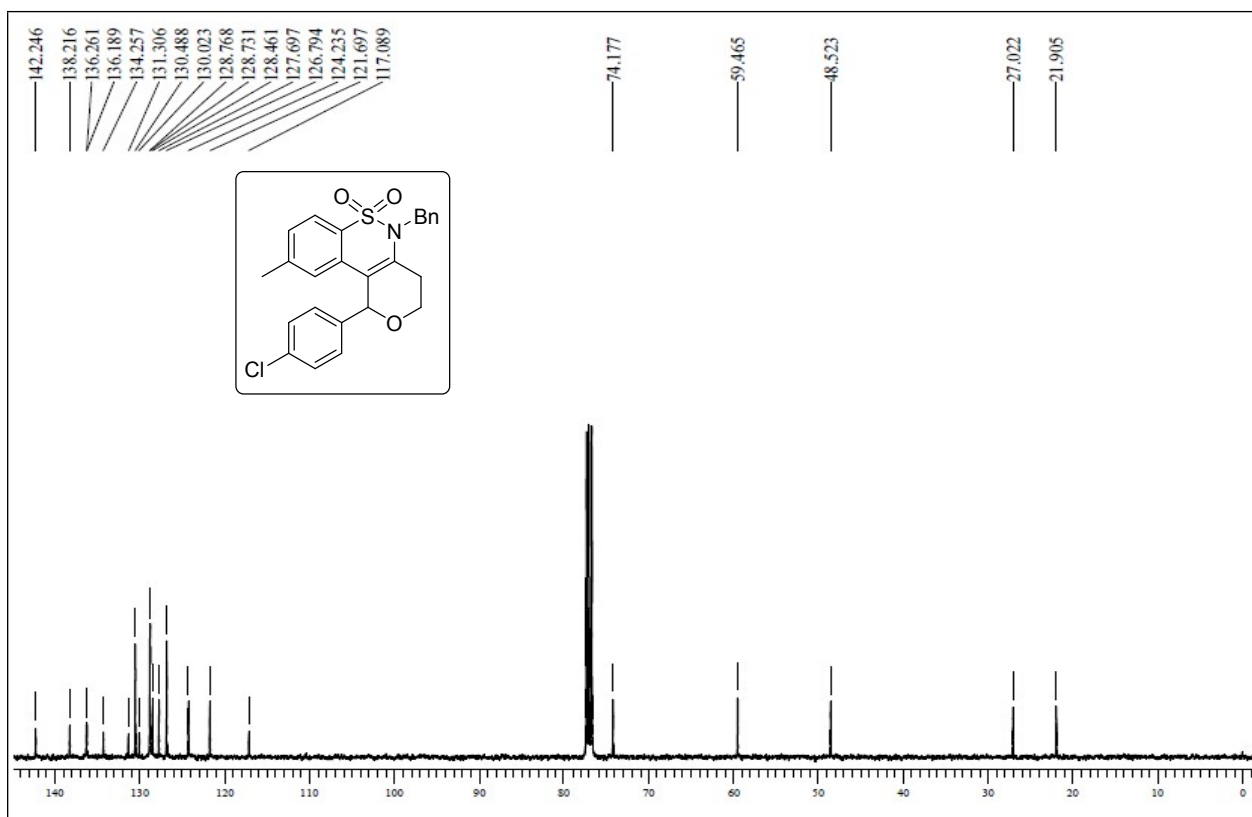

**<sup>13</sup>C NMR of Compound 4w**

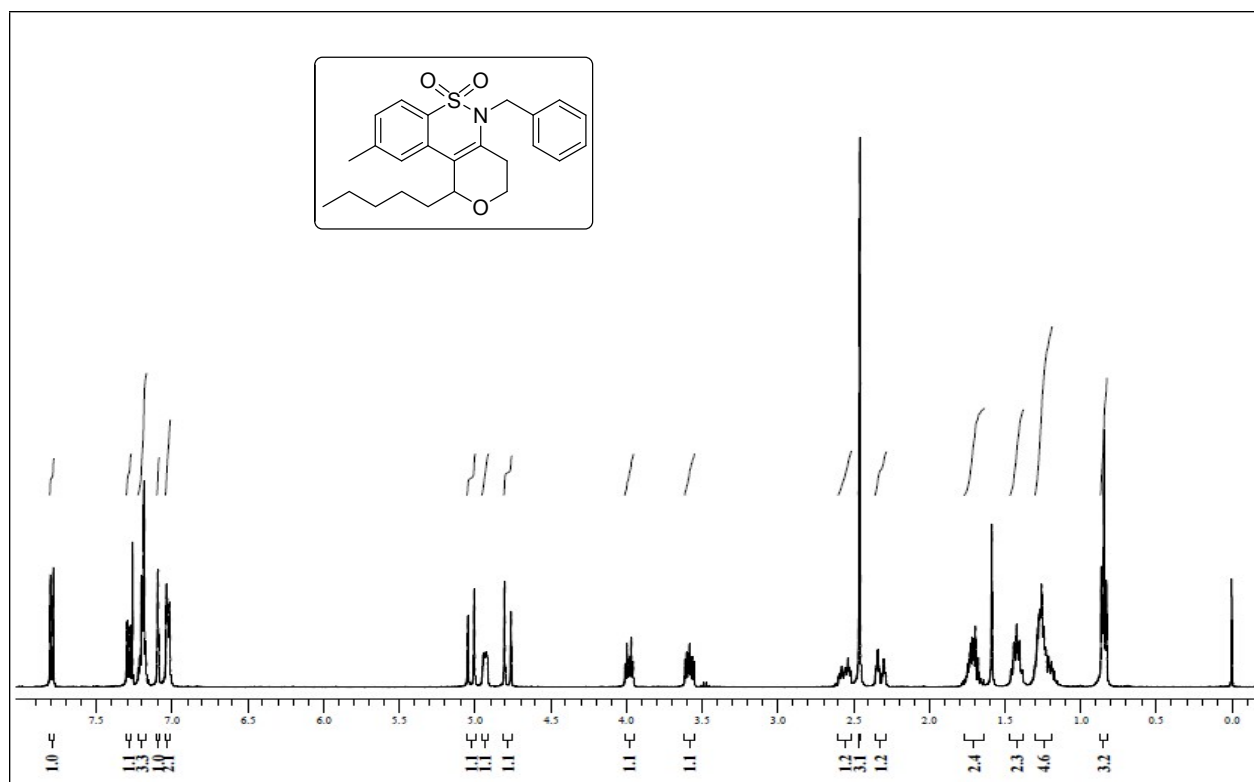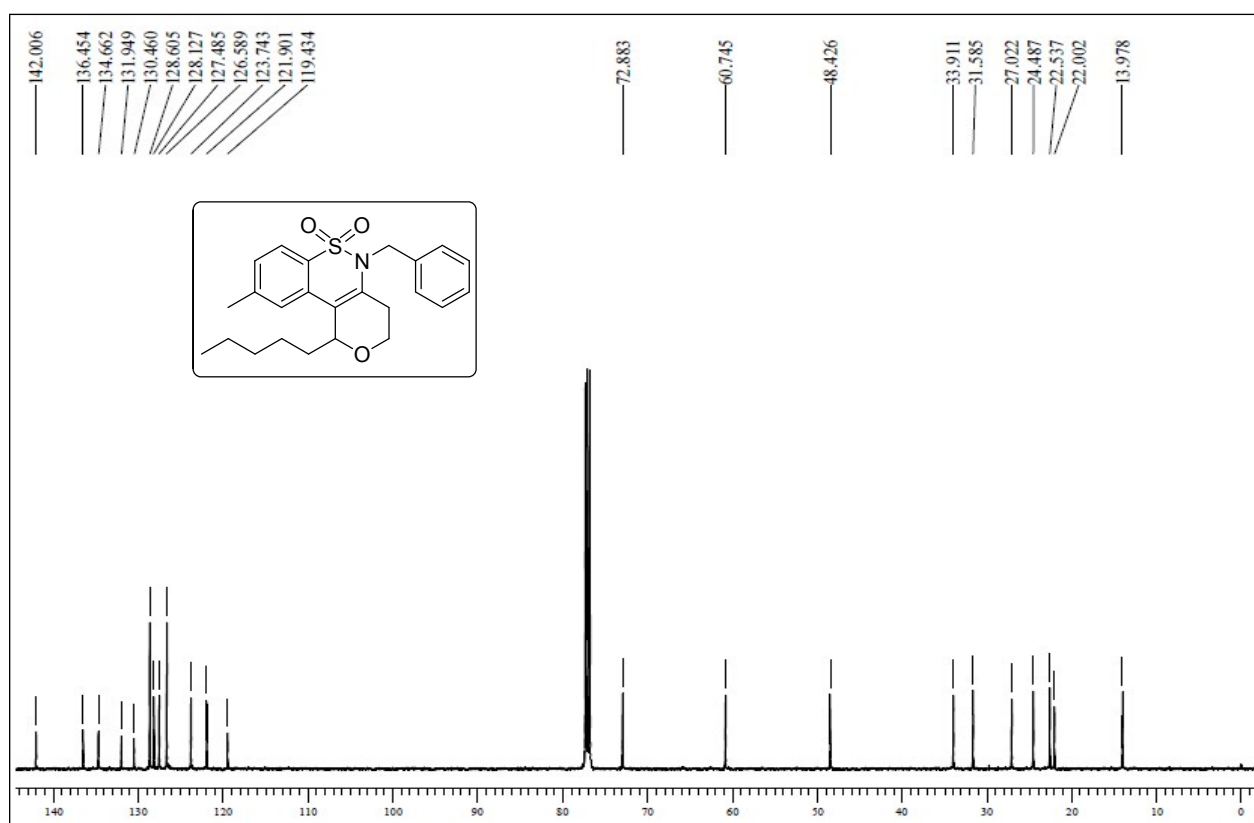

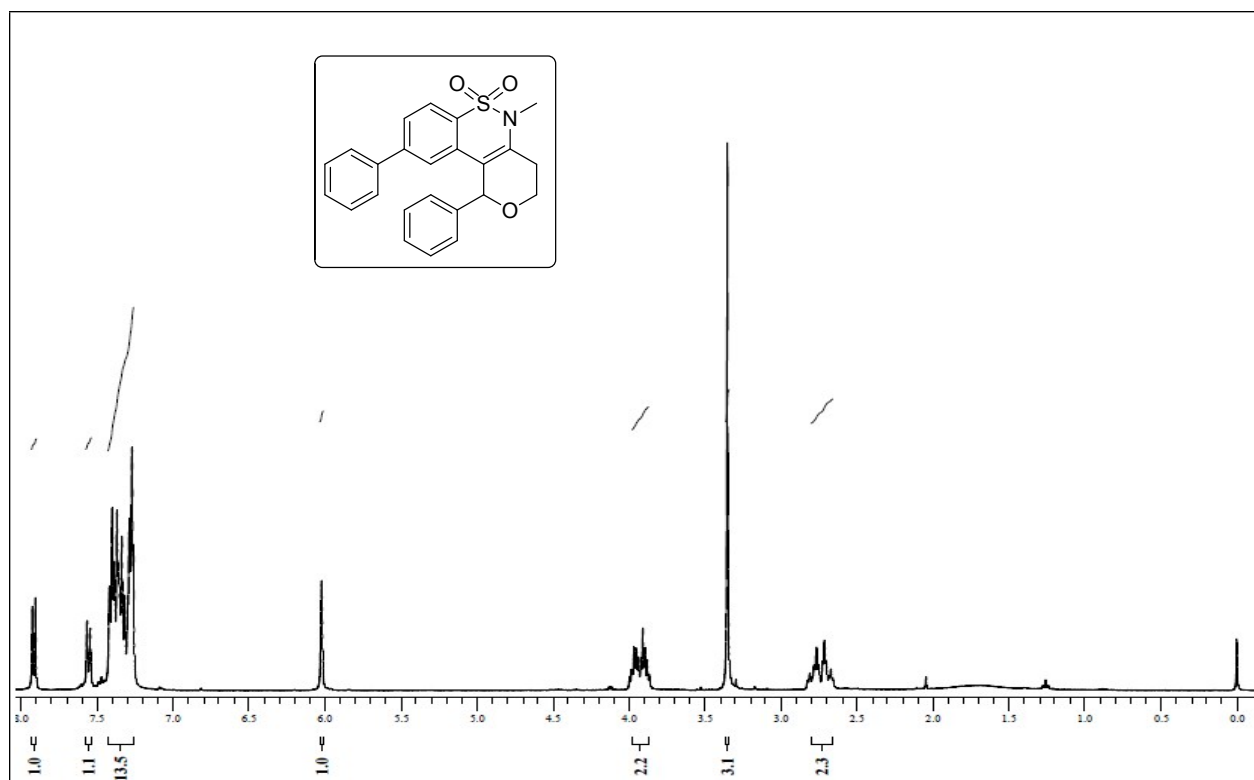

$^1\text{H NMR}$  of Compound 4y

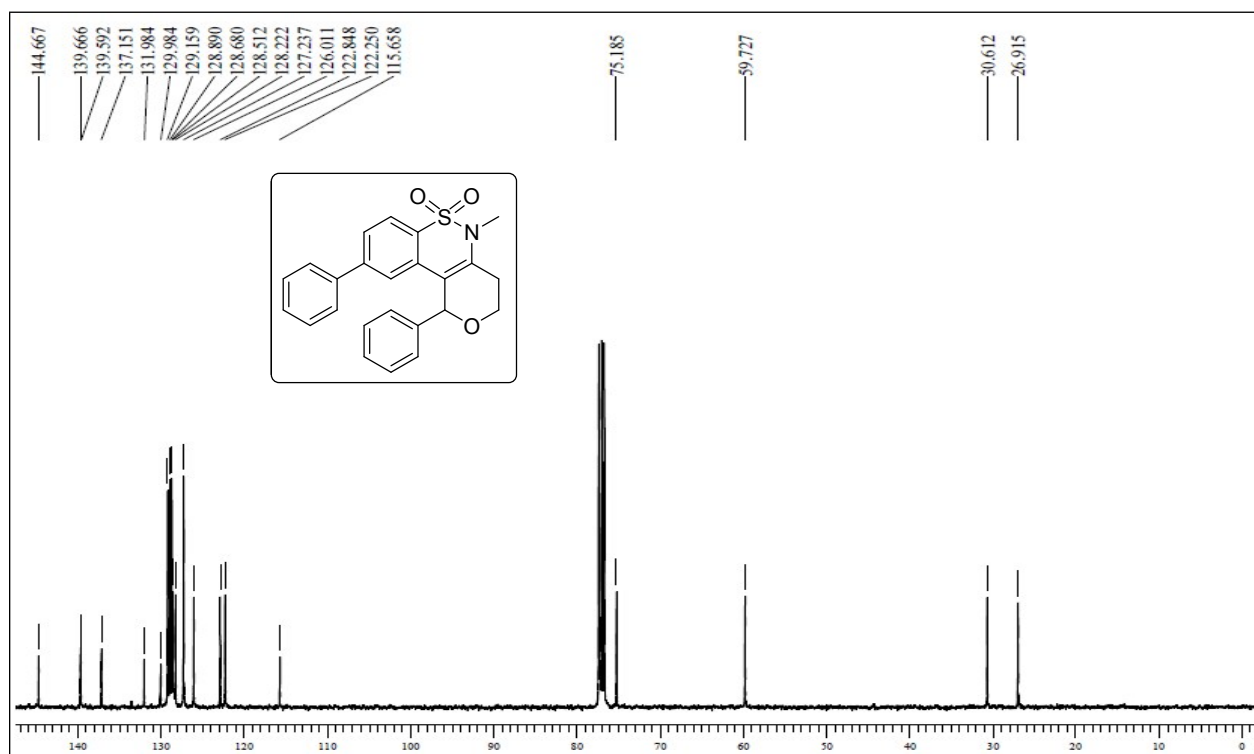

$^{13}\text{C NMR}$  of Compound 4y

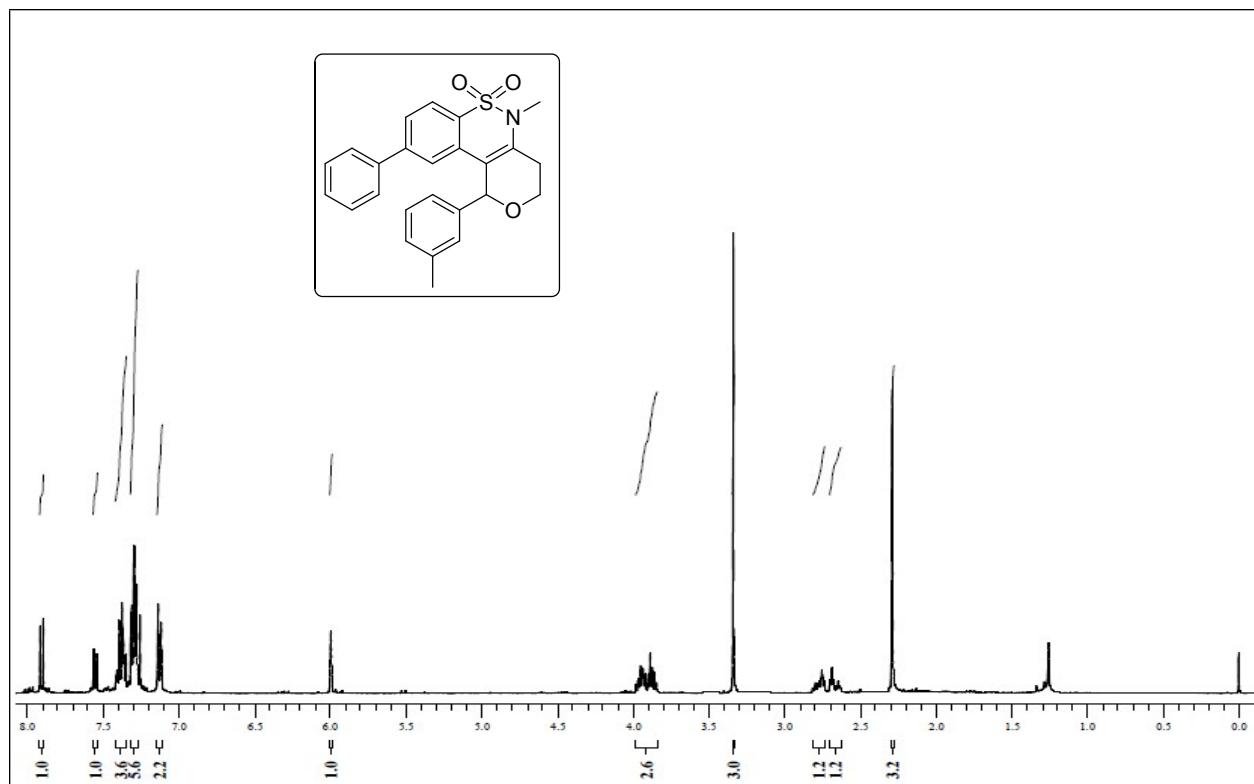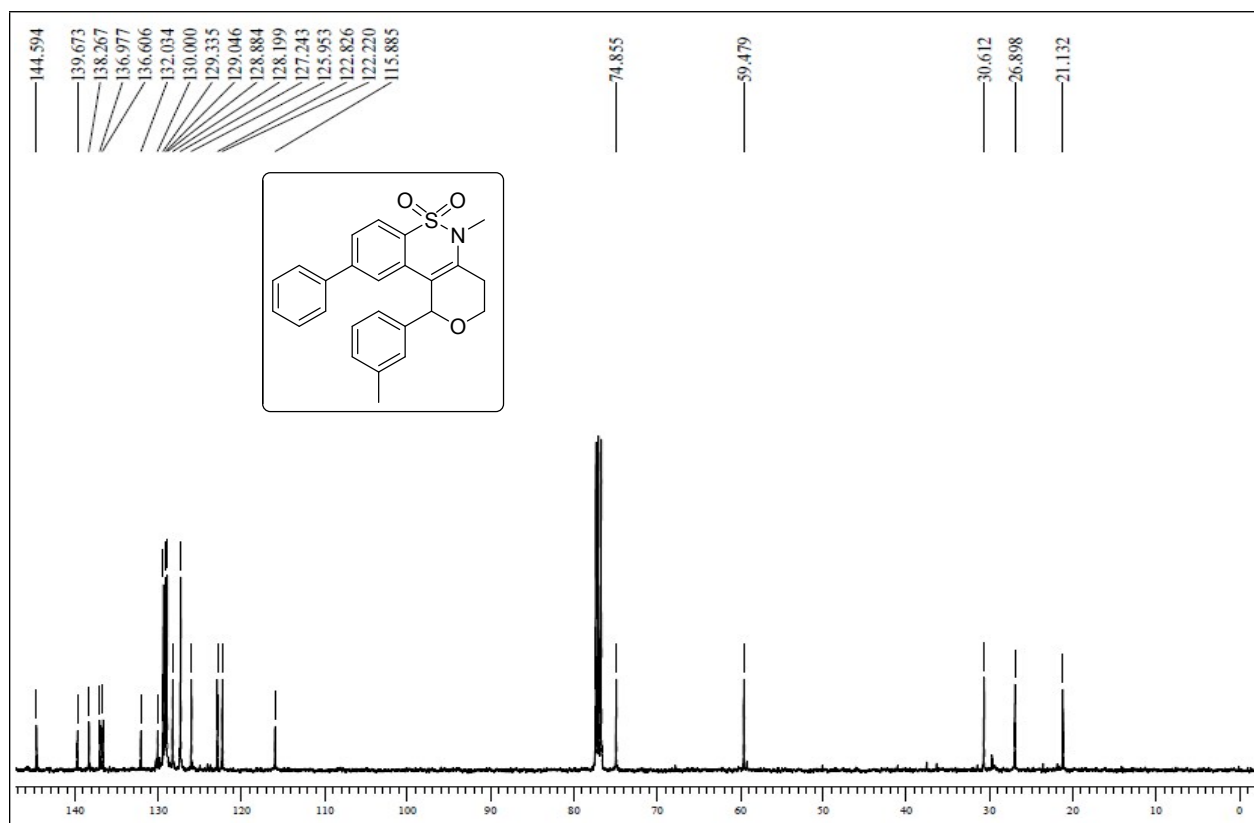

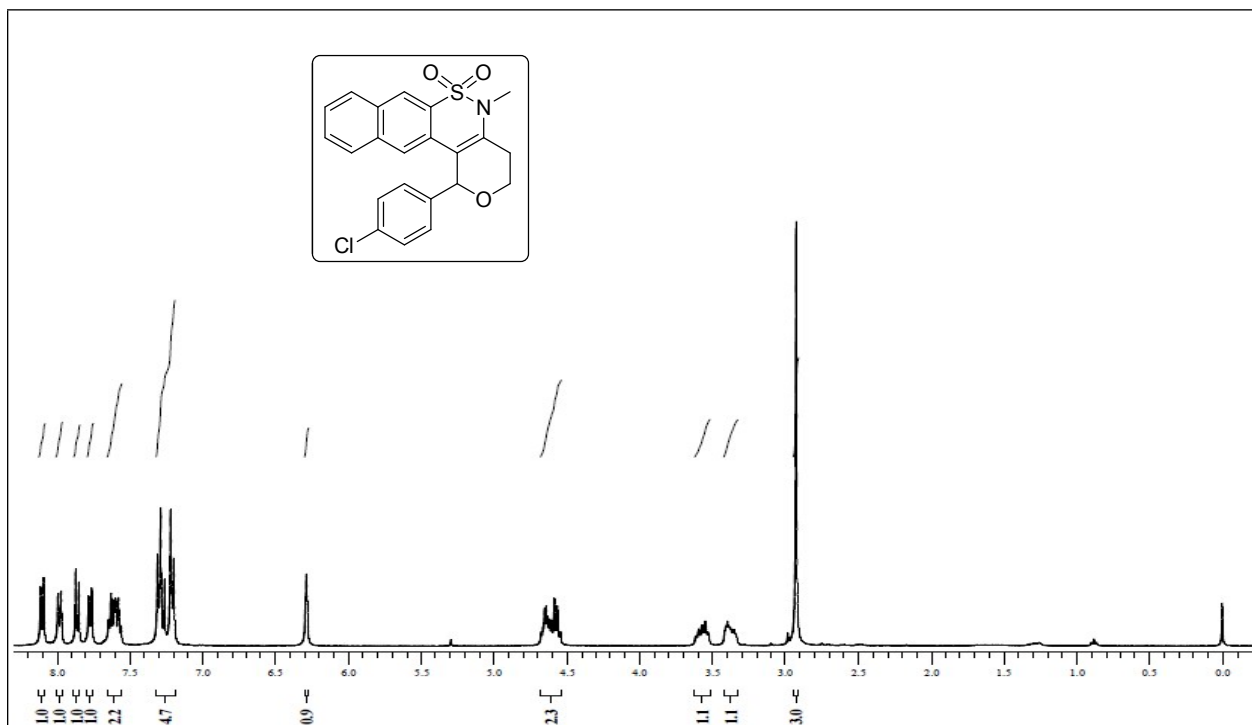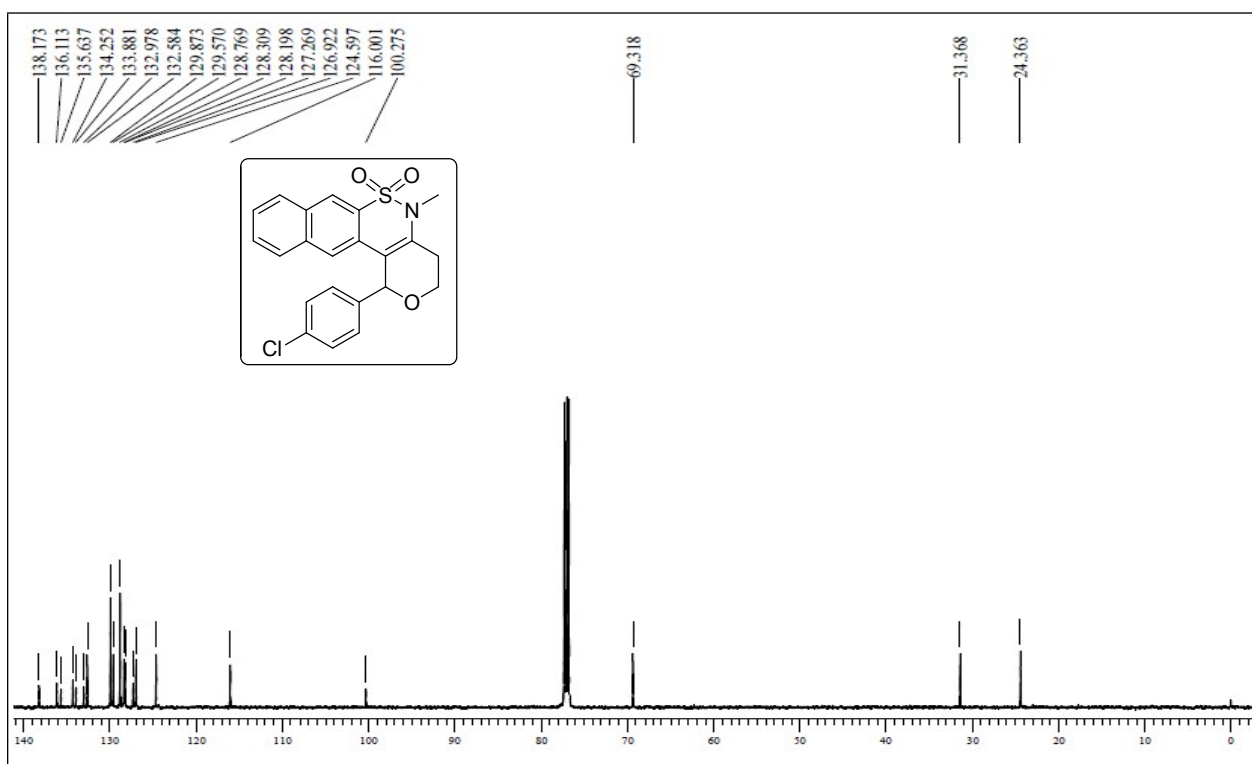

#### 4. X-ray Crystallography of 4d

X-ray data for the compounds were collected at room temperature using a Bruker Smart Apex CCD diffractometer with graphite monochromated MoK $\alpha$  radiation ( $\lambda=0.71073\text{\AA}$ ) with  $\omega$ -scan method [1]. Preliminary lattice parameters and orientation matrices were obtained from four sets of frames.

Integration and scaling of intensity data was accomplished using SAINT program [1]. The structure was solved by direct methods using SHELXS [2] and refinement was carried out by full-matrix least-squares technique using SHELXL [2]. Anisotropic displacement parameters were included for all non-hydrogen atoms. All other H atoms were positioned geometrically and treated as riding on their parent C atoms [C-H = 0.93-0.97  $\text{\AA}$  and  $U_{\text{iso}}(\text{H}) = 1.5U_{\text{eq}}(\text{C})$  for methyl H or  $1.2U_{\text{eq}}(\text{C})$  for other H atoms]. The methyl groups were allowed to rotate but not to tip.

**Crystal Data for 4d:** C<sub>17</sub>H<sub>15</sub>NO<sub>3</sub> ( $M=281.31$  g/mol): monoclinic, space group P2<sub>1</sub>/n (no. 14),  $a = 6.0088(1)$   $\text{\AA}$ ,  $b = 21.3777(5)$   $\text{\AA}$ ,  $c = 10.8832(2)$   $\text{\AA}$ ,  $\beta = 93.6225(7)^\circ$ ,  $V = 1395.20(5)$   $\text{\AA}^3$ ,  $Z = 4$ ,  $T = 294.15$  K,  $\mu(\text{Mo K}\alpha) = 0.092$  mm<sup>-1</sup>,  $D_{\text{calc}} = 1.3391$  g/cm<sup>3</sup>, 50265 reflections measured ( $5.34^\circ \leq 2\Theta \leq 61.42^\circ$ ), 4330 unique ( $R_{\text{int}} = 0.0856$ ,  $R_{\text{sigma}} = 0.0516$ ) which were used in all calculations. The final  $R_1$  was 0.0686 ( $I > 2\sigma(I)$ ) and  $wR_2$  was 0.1577 (all data). CCDC 1834668 contains supplementary Crystallographic data for the structure. These data can be obtained free of charge at [www.ccdc.cam.ac.uk/conts/retrieving.html](http://www.ccdc.cam.ac.uk/conts/retrieving.html) [or from the Cambridge Crystallographic Data Centre (CCDC), 12 Union Road, Cambridge CB2 1EZ, UK; fax: +44(0) 1223 336 033; email: [deposit@ccdc.cam.ac.uk](mailto:deposit@ccdc.cam.ac.uk)].

1. Bruker (2001). SAINT (Version 6.28a) & SMART (Version 5.625). Bruker AXS Inc., Madison, Wisconsin, USA.
2. Sheldrick G. M. (2015) Acta Crystallogr C71: 3-8.
